# Supplementary material for: Synthesis and In Vitro Anticancer Activity of Novel Dehydroabietic Acid-Based Acylhydrazones
Source: PubMed Central journal article supplement (PMC6152134; doi:10.3390/molecules22071087), 2017-06-29
Supplement: molecules-22-01087-s001.pdf [file molecules-22-01087-s001.pdf]

# Synthesis and in Vitro Anticancer Activity of Novel Dehydroabietic Acid-Based Acylhydrazones

Fang-Yao Li , Xiu Wang, Wen-Gui Duan , Gui-Shan Lin

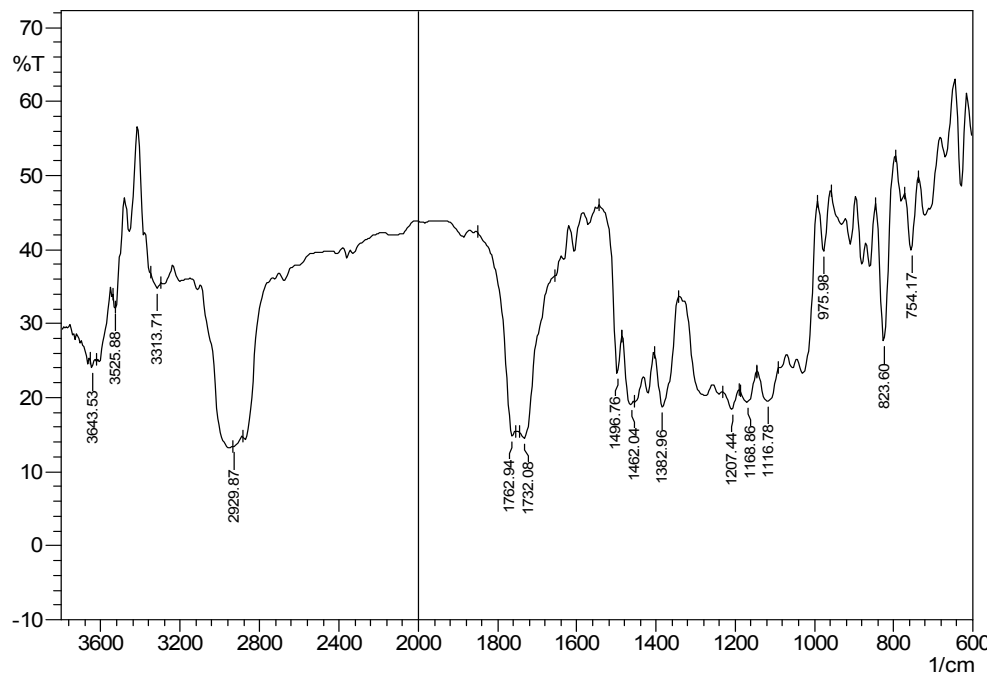

Figure S1. FTIR spectrum of dehydroabietic acid-based ethyl acetate (2)

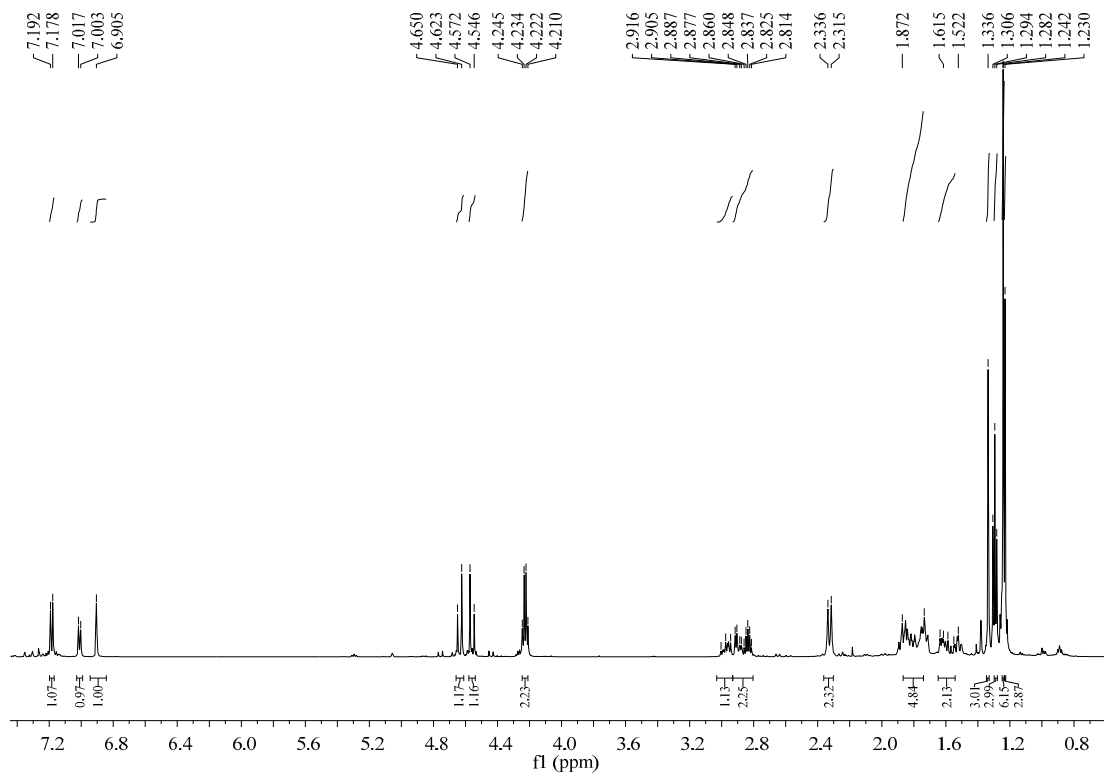

Figure S2. <sup>1</sup>H-NMR spectrum of dehydroabietic acid-based ethyl acetate (2) in CDCl<sub>3</sub>

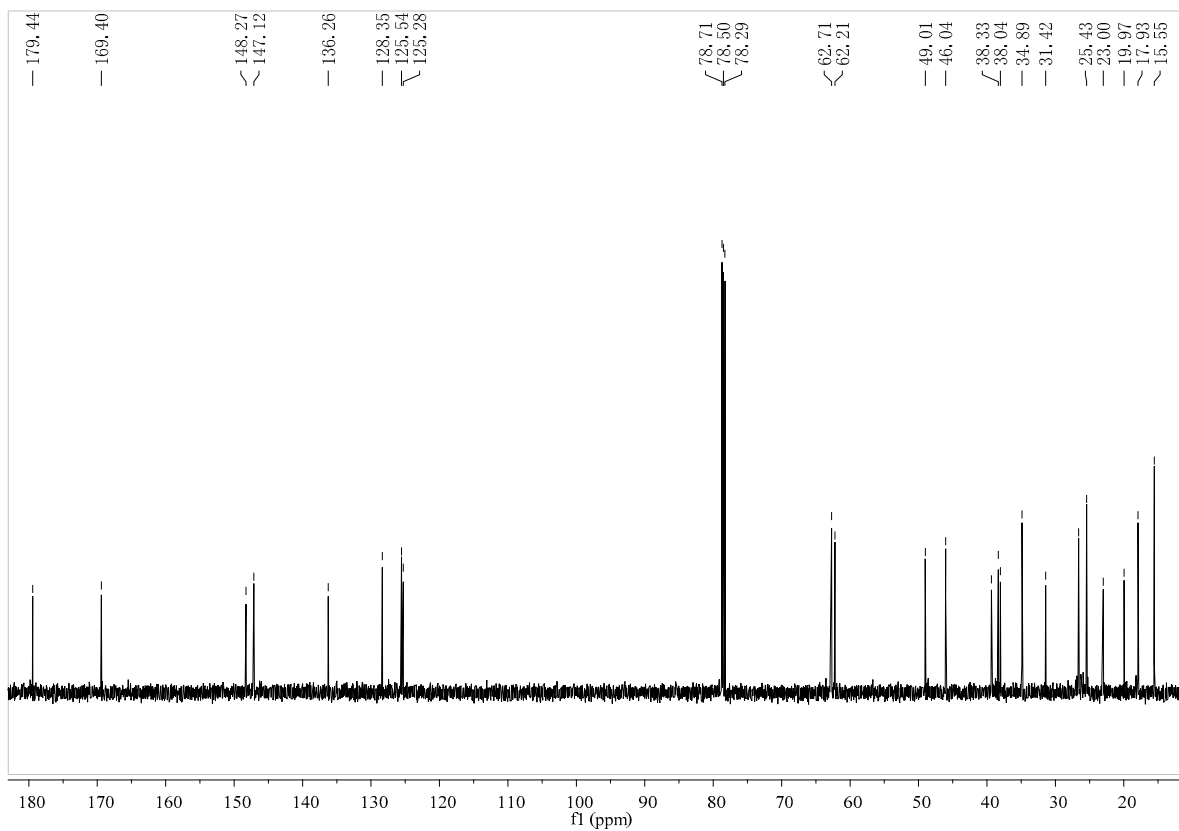

**Figure S3.**  $^{13}\text{C}$ -NMR spectrum of dehydroabietic acid-based ethyl acetate (**2**) in  $\text{CDCl}_3$

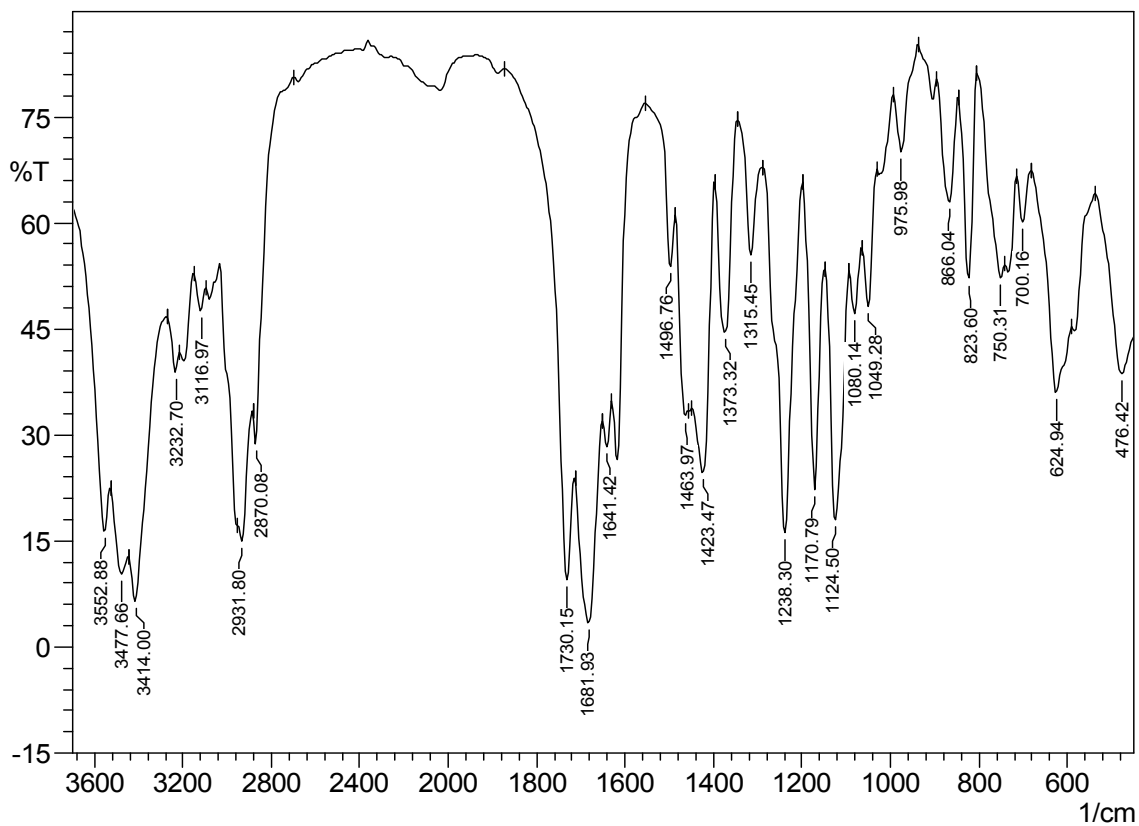

**Figure S4.** FTIR spectrum of dehydroabietic acid-based hydrazide (**3**)

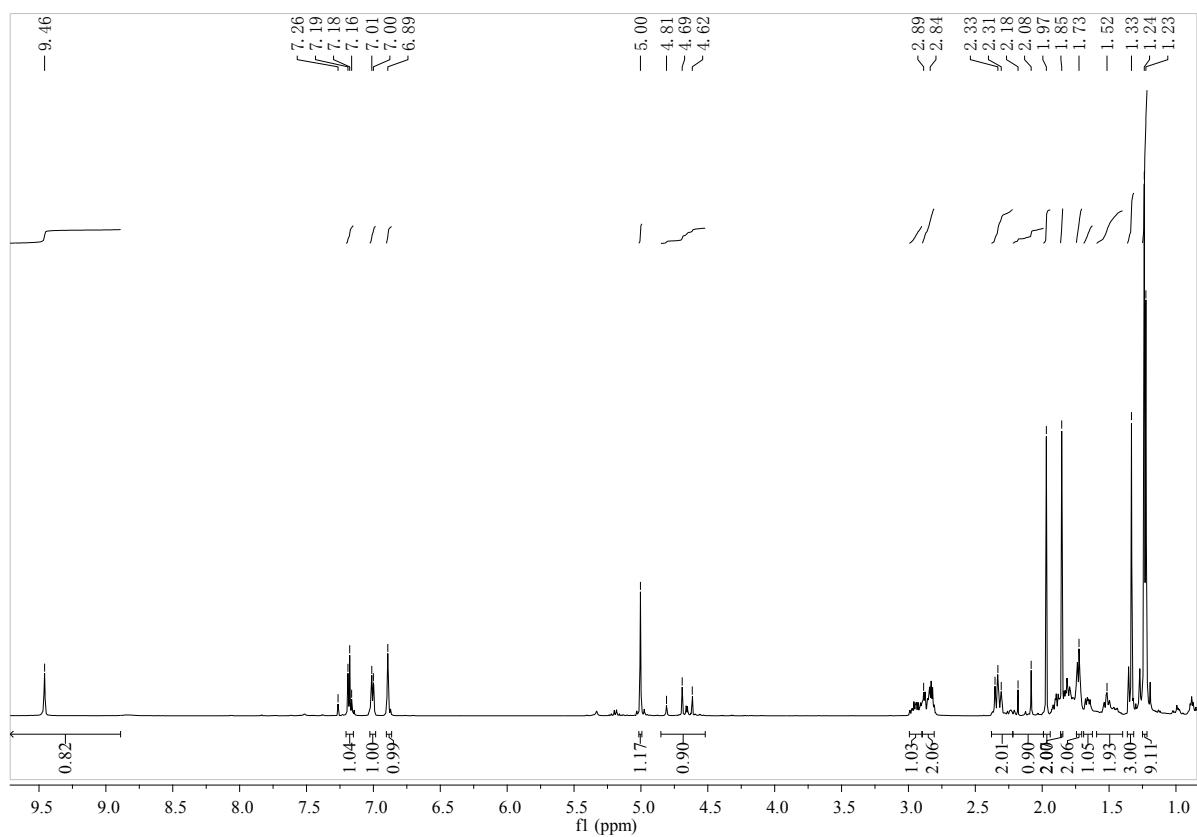

Figure S5.  $^1\text{H}$ -NMR spectrum of dehydroabietic acid-based hydrazide (**3**) in  $\text{CDCl}_3$

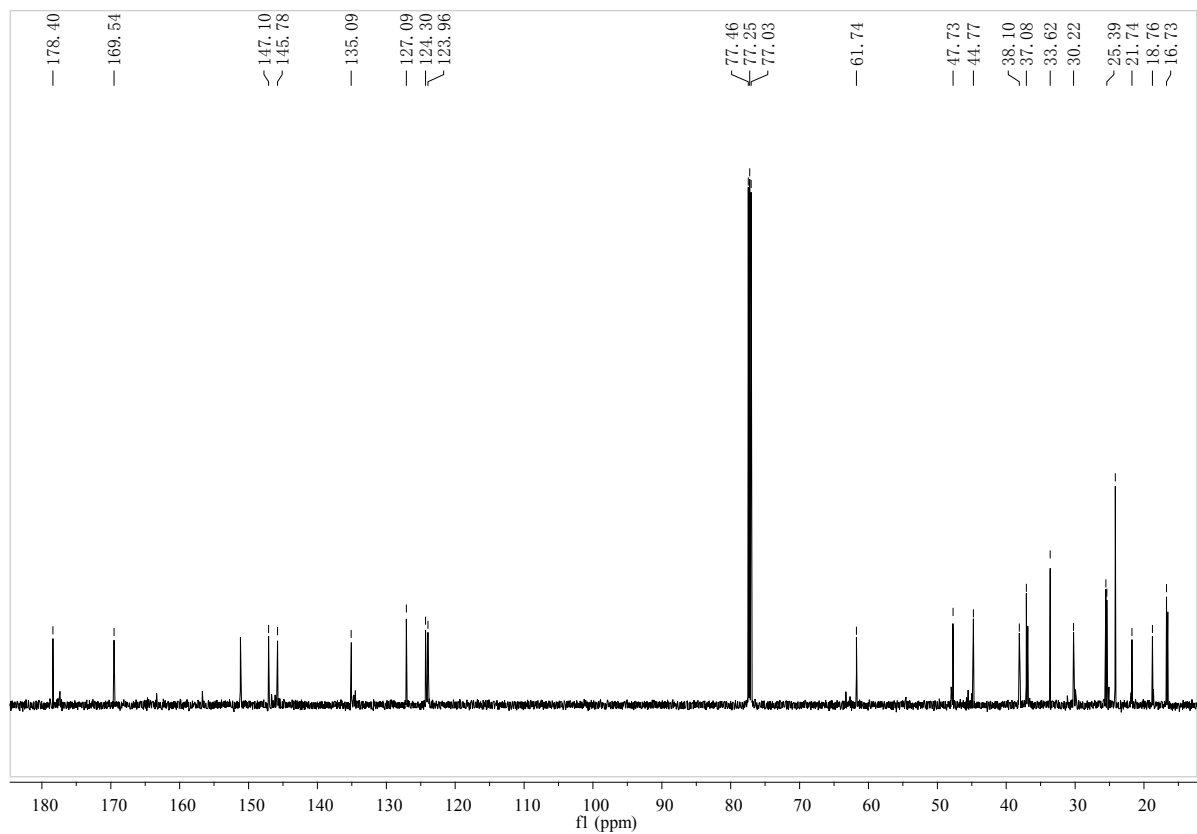

Figure S6.  $^{13}\text{C}$ -NMR spectrum of dehydroabietic acid-based hydrazide (**3**) in  $\text{CDCl}_3$

JN #44 RT: 0.39 AV: 1 SB: 37 0.01-0.25 , 0.87-0.94 NL: 2.08E6  
T: -c ESI Q1MS [100.000-1000.000]

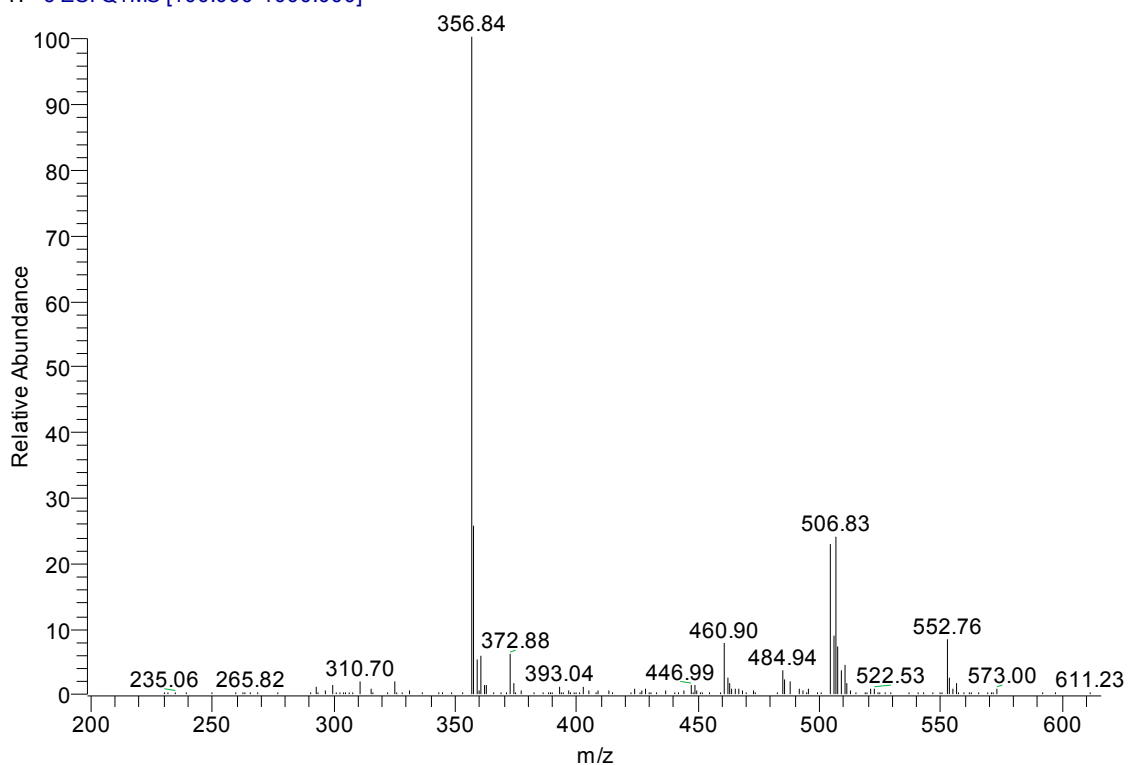

Figure S7. ESI-MS spectrum of dehydroabietic acid-based hydrazide (**3**)

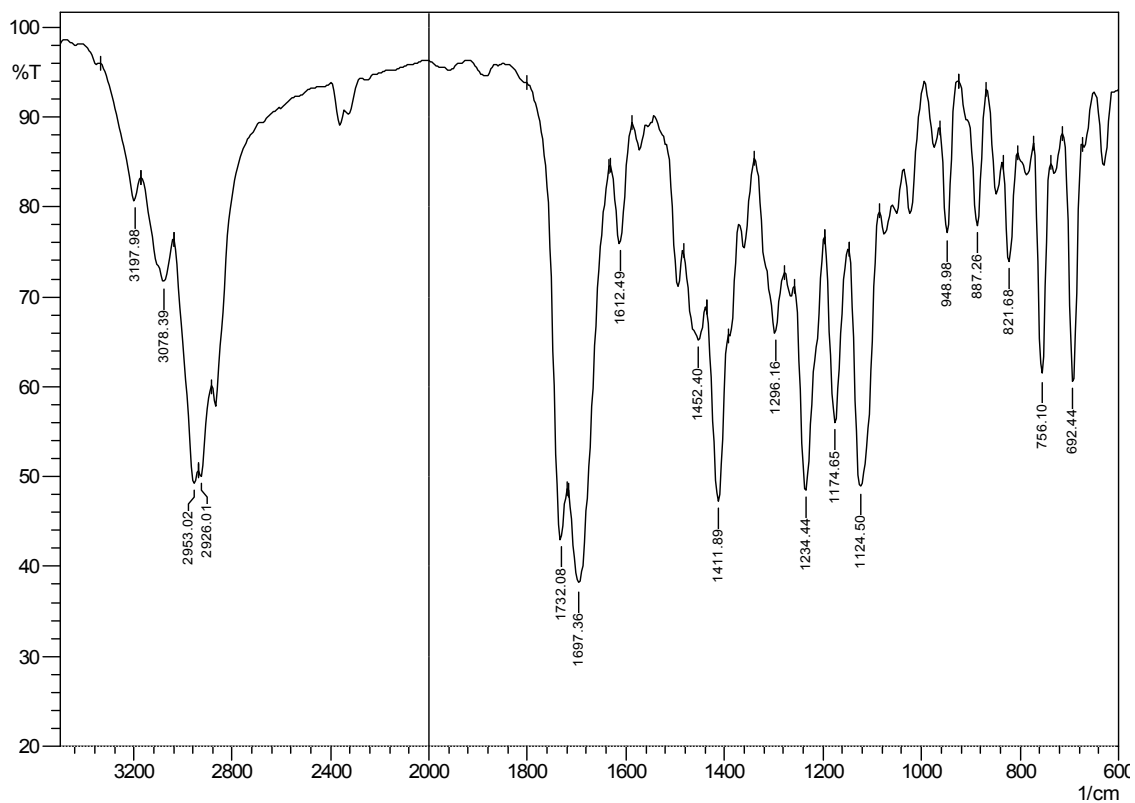

Figure S8. FTIR spectrum of the target compound (**4a**)

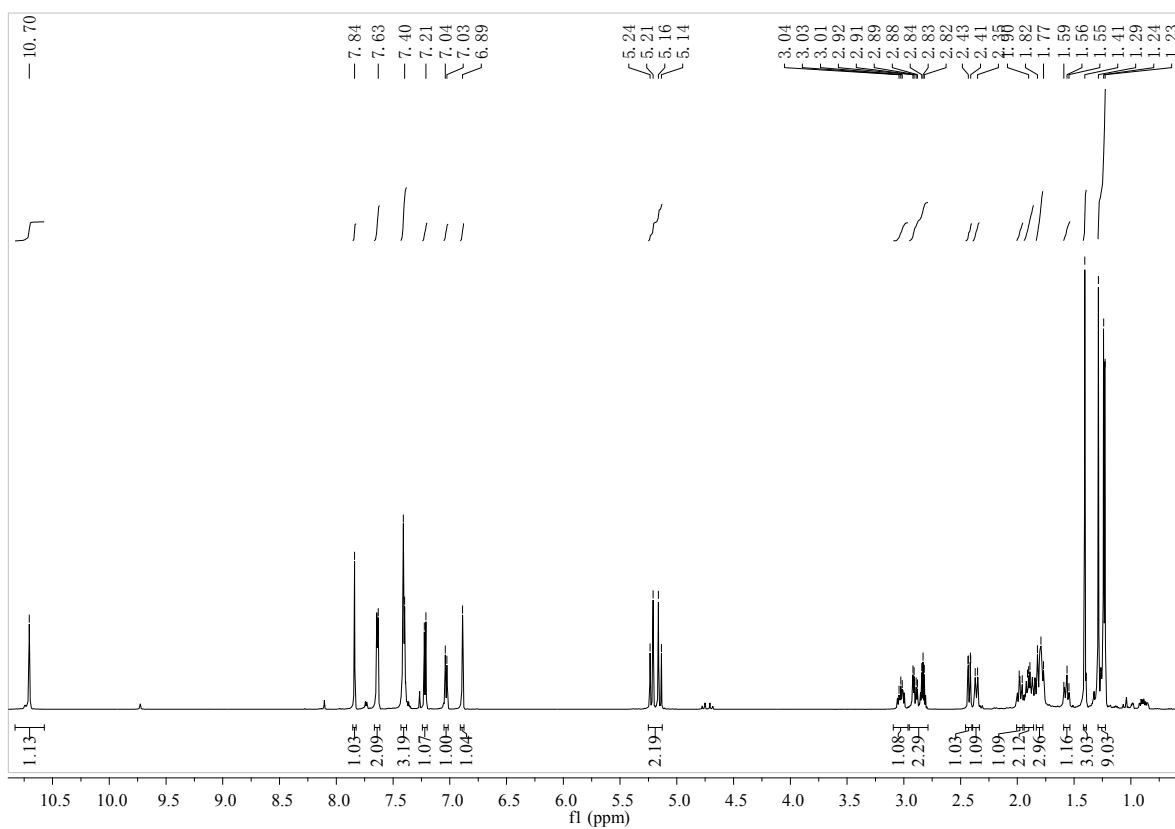

**Figure S9.**  $^1\text{H-NMR}$  spectrum of the target compound (**4a**) in  $\text{CDCl}_3$

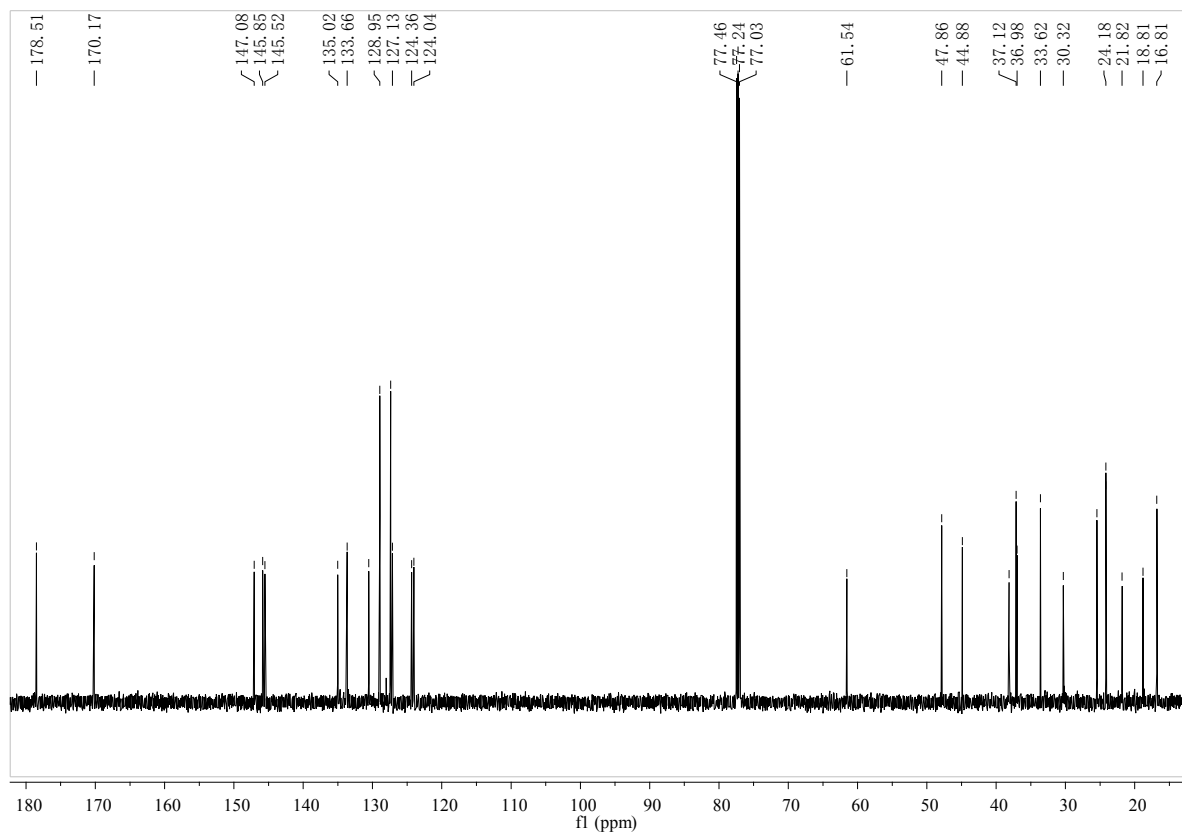

**Figure S10.**  $^{13}\text{C-NMR}$  spectrum of the target compound (**4a**) in  $\text{CDCl}_3$

JN-BJQ #102 RT: 0.90 AV: 1 NL: 6.10E6  
T: -c ESI Q1MS [100.000-1000.000]

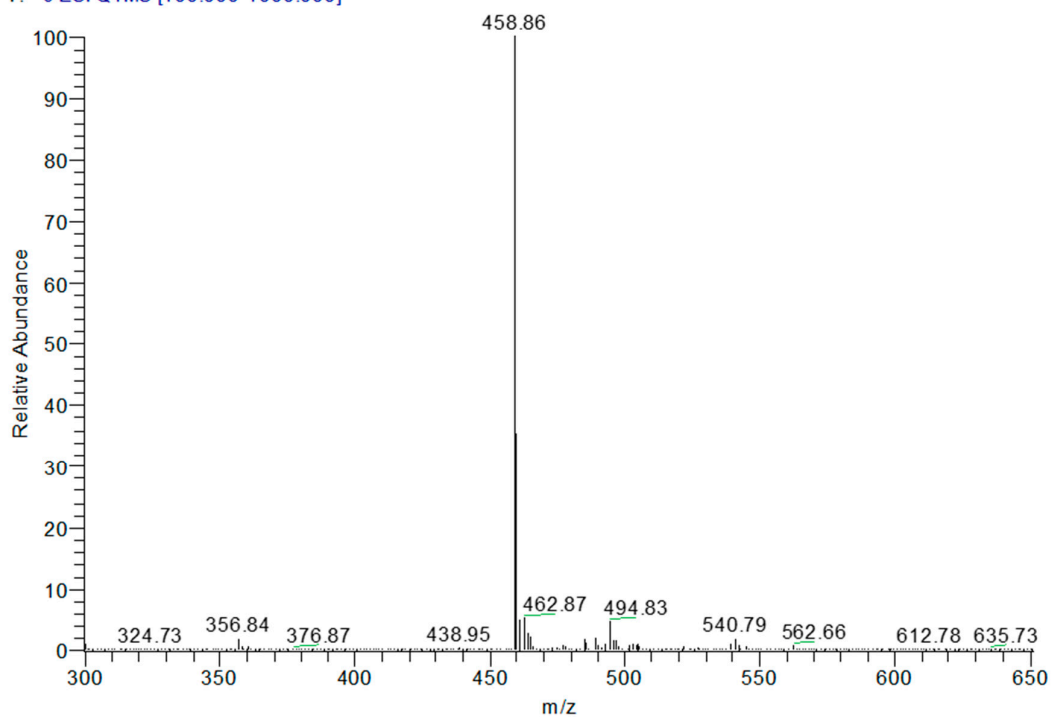

Figure S11. ESI-MS spectrum of the target compound (4a)

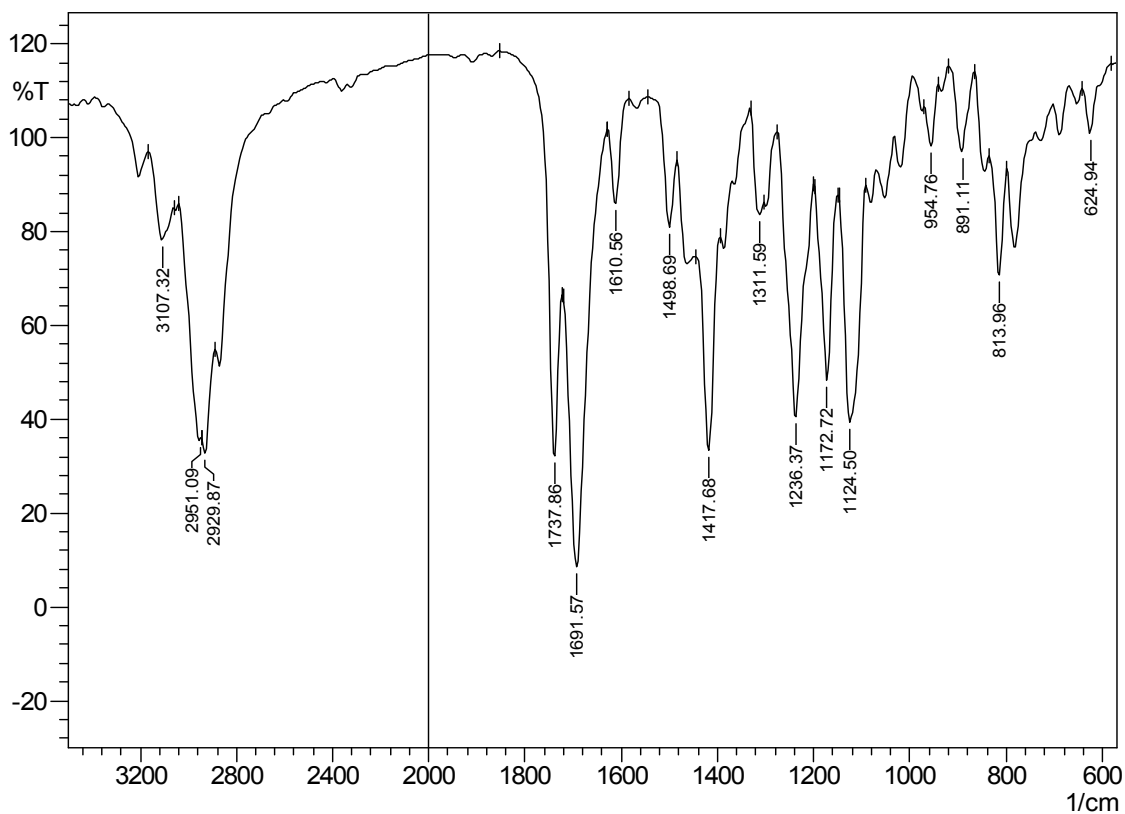

Figure S12. FTIR spectrum of the target compound (4b)

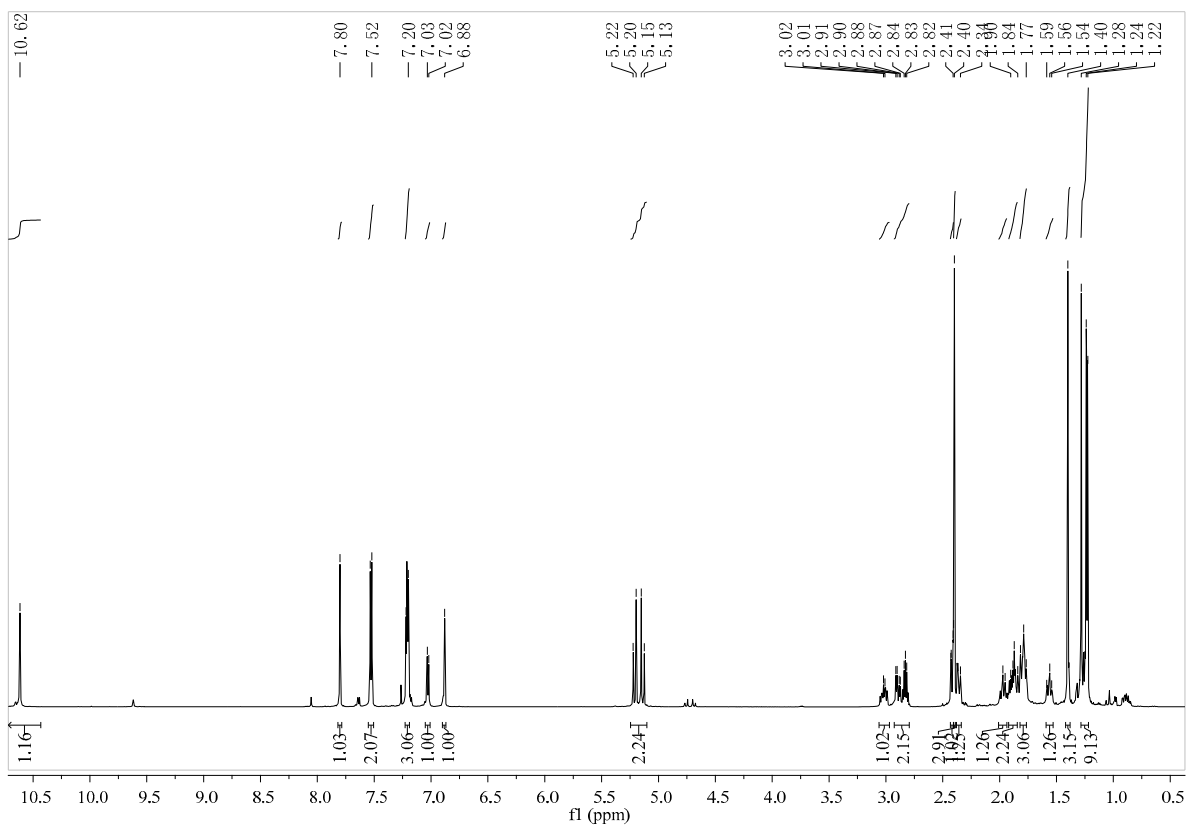

Figure S13.  $^1\text{H-NMR}$  spectrum of the target compound (**4b**) in  $\text{CDCl}_3$

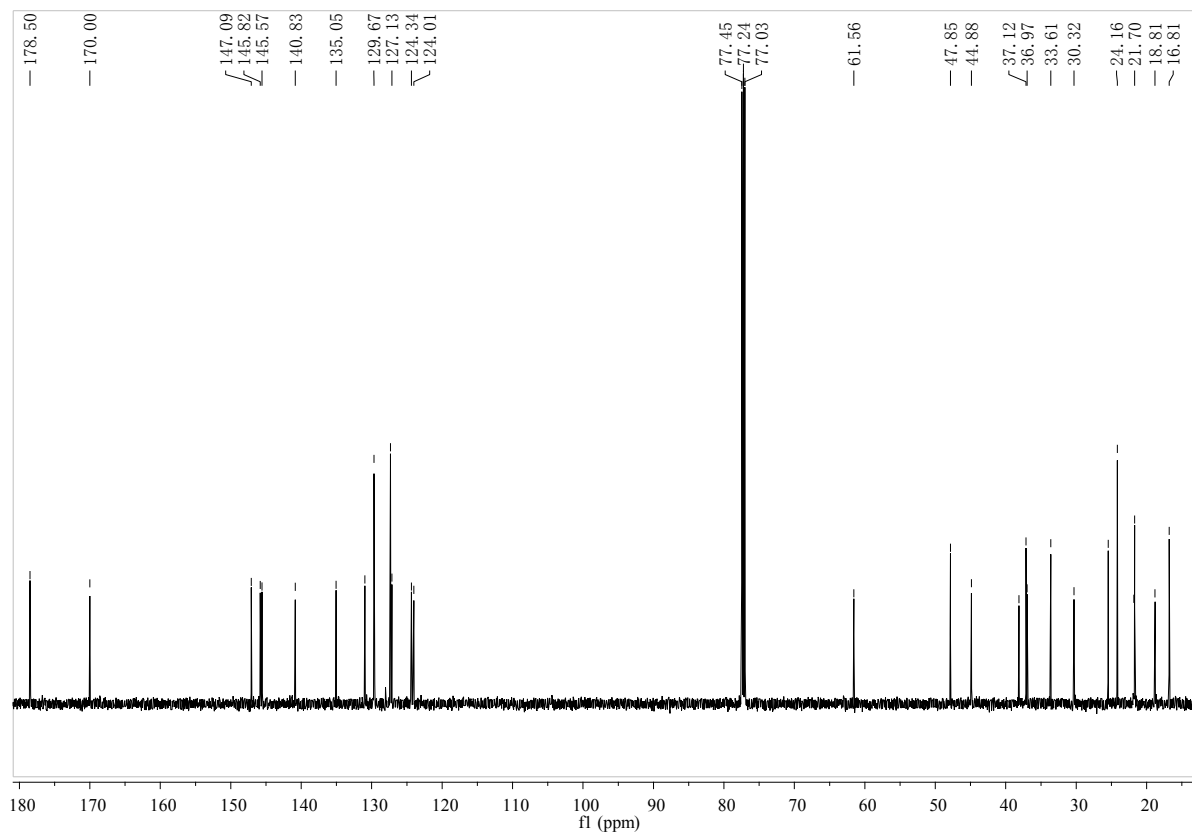

Figure S14.  $^{13}\text{C-NMR}$  spectrum of the target compound (**4b**) in  $\text{CDCl}_3$

JN-DM #73 RT: 0.64 AV: 1 NL: 6.09E6  
T: -c ESI Q1MS [100.000-1000.000]

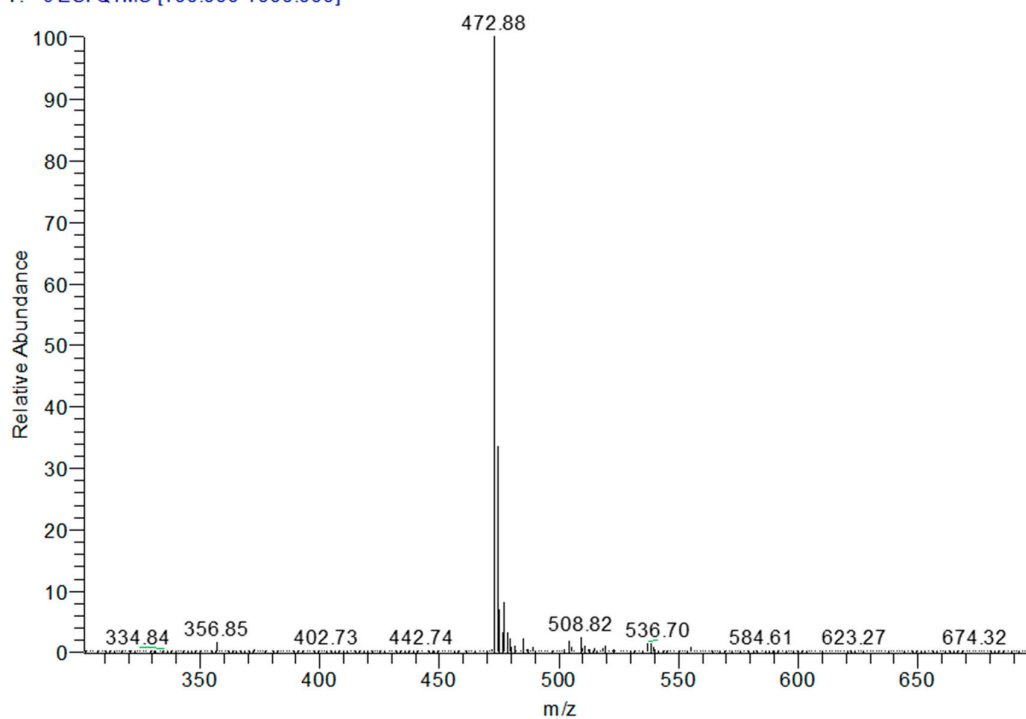

Figure S15. ESI-MS spectrum of the target compound (4b)

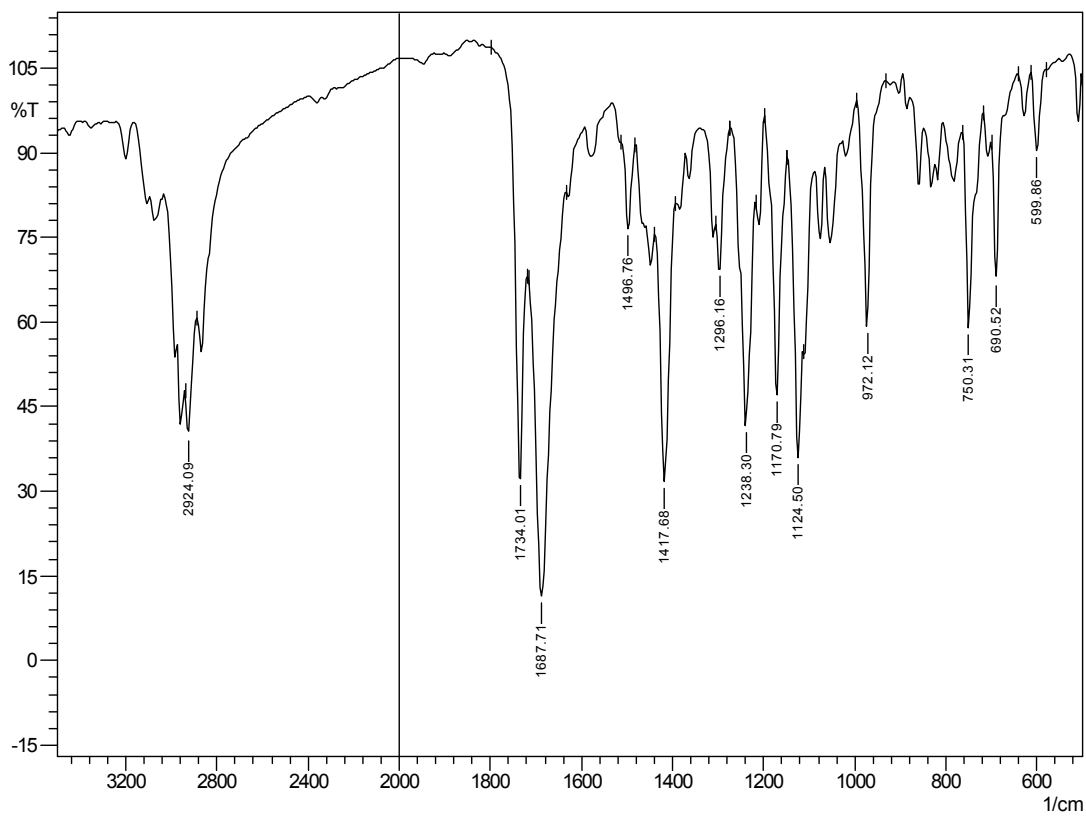

Figure S16. FTIR spectrum of the target compound (4c)



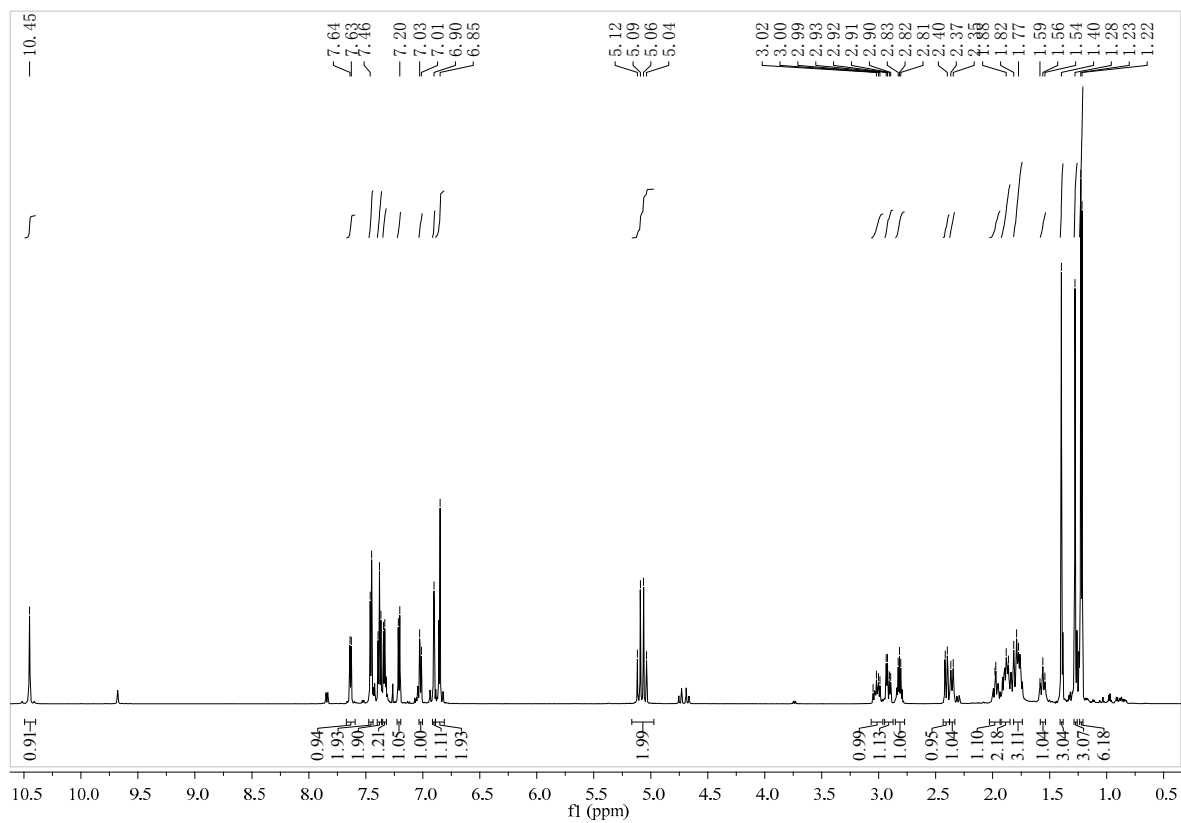

Figure S17.  $^1\text{H-NMR}$  spectrum of the target compound (**4c**) in  $\text{CDCl}_3$

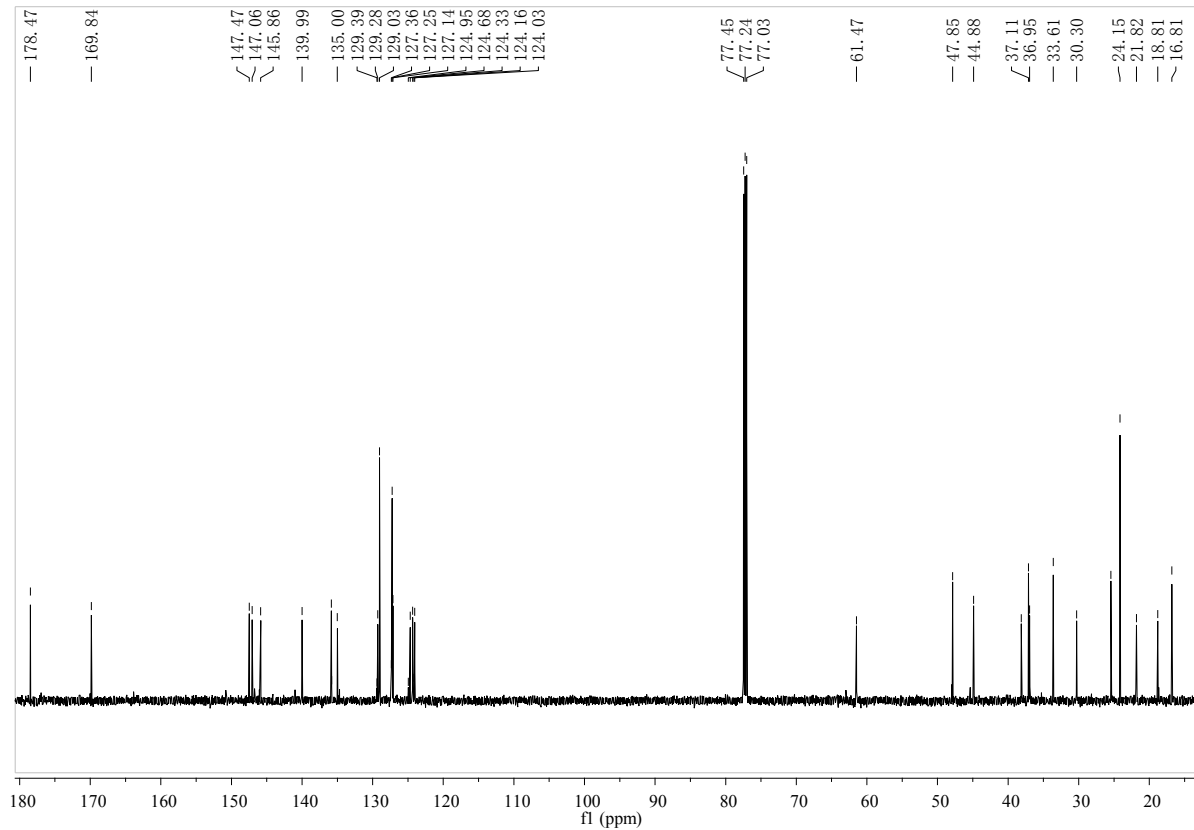

Figure S18.  $^{13}\text{C-NMR}$  spectrum of the target compound (**4c**) in  $\text{CDCl}_3$

JN-CMA #68 RT: 0.60 AV: 1 NL: 6.25E6  
T: - c ESI Q1MS [100.000-1000.000]

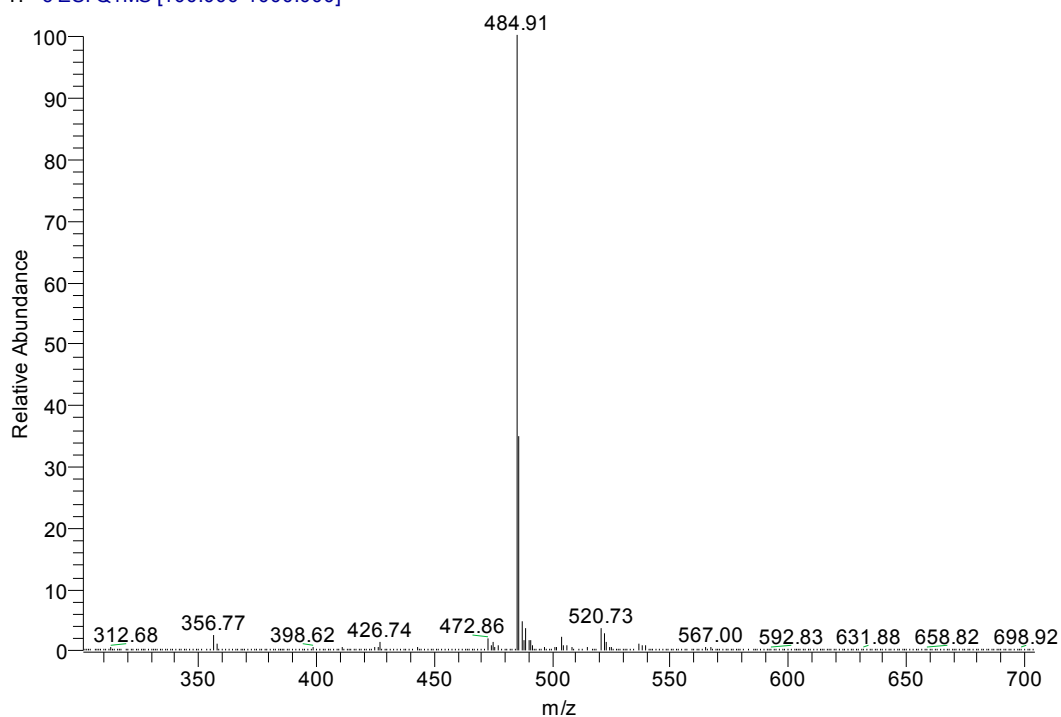

Figure S19. ESI-MS spectrum of the target compound (4c)

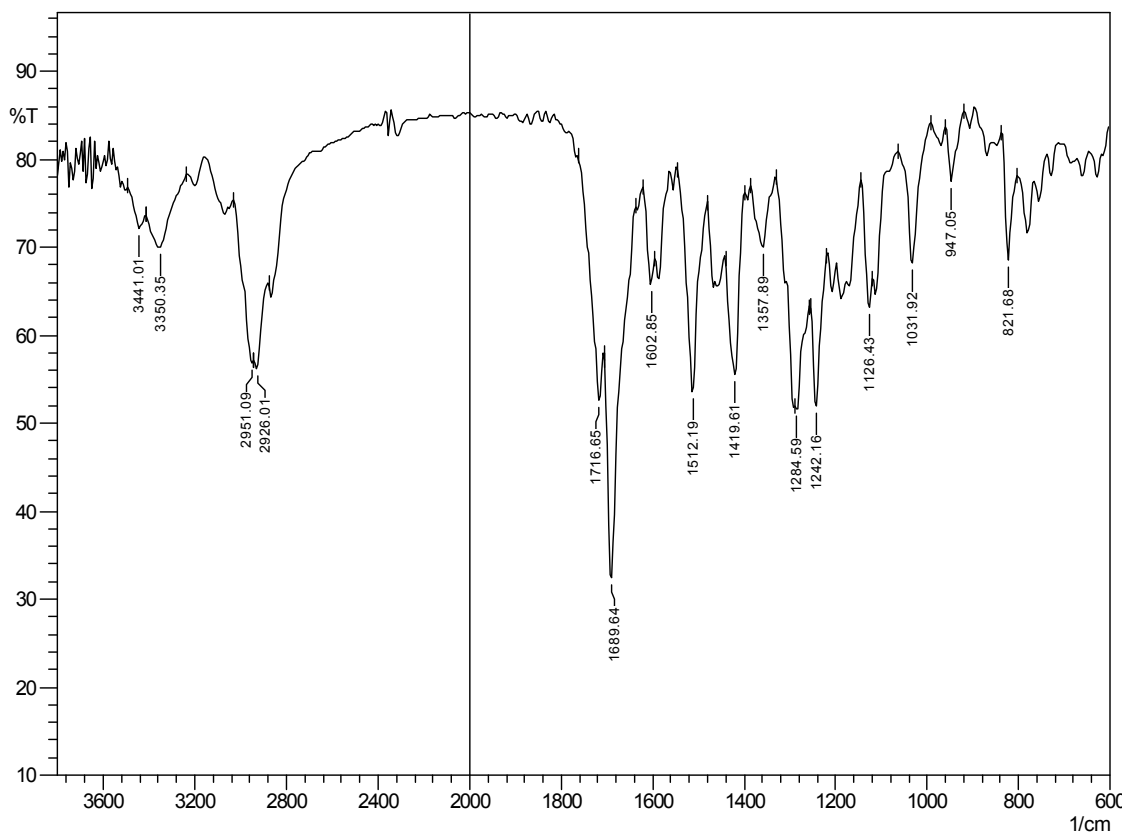

Figure S20. FTIR spectrum of the target compound (4d)

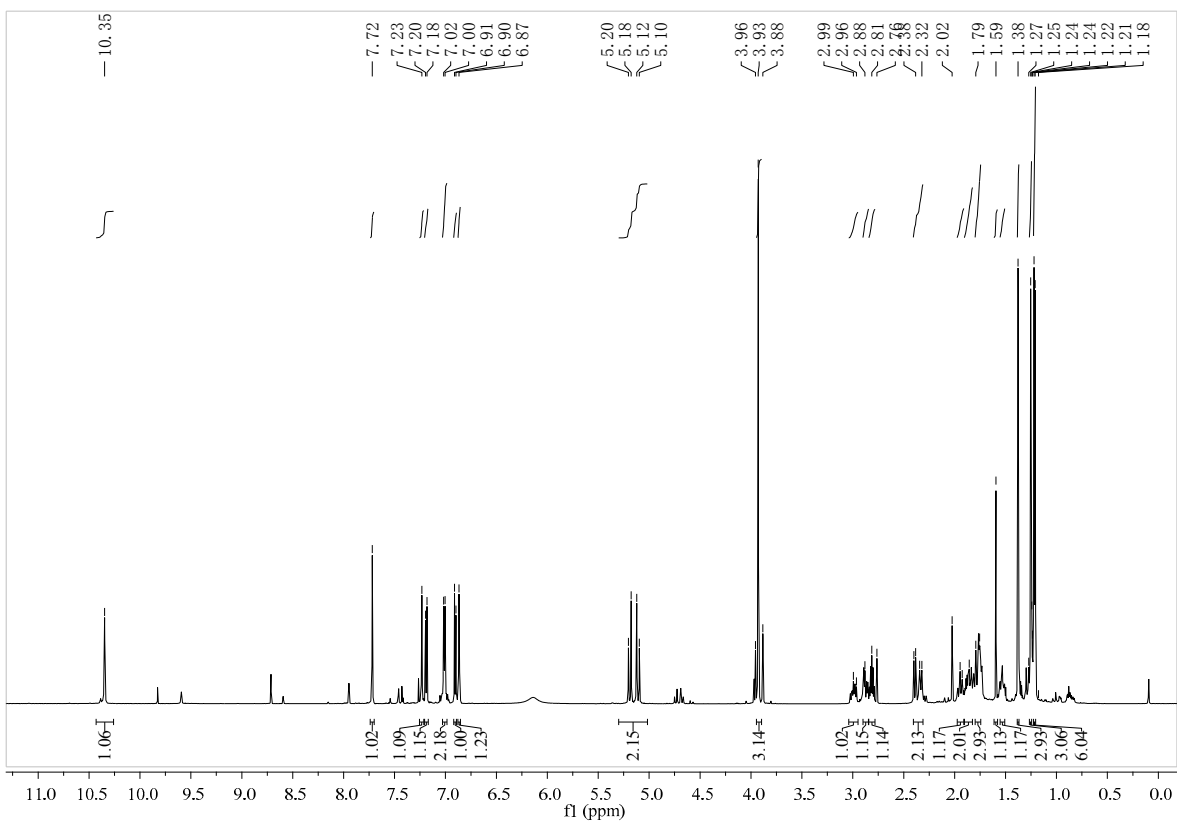

Figure S21.  $^1\text{H-NMR}$  spectrum of the target compound (**4d**) in  $\text{CDCl}_3$

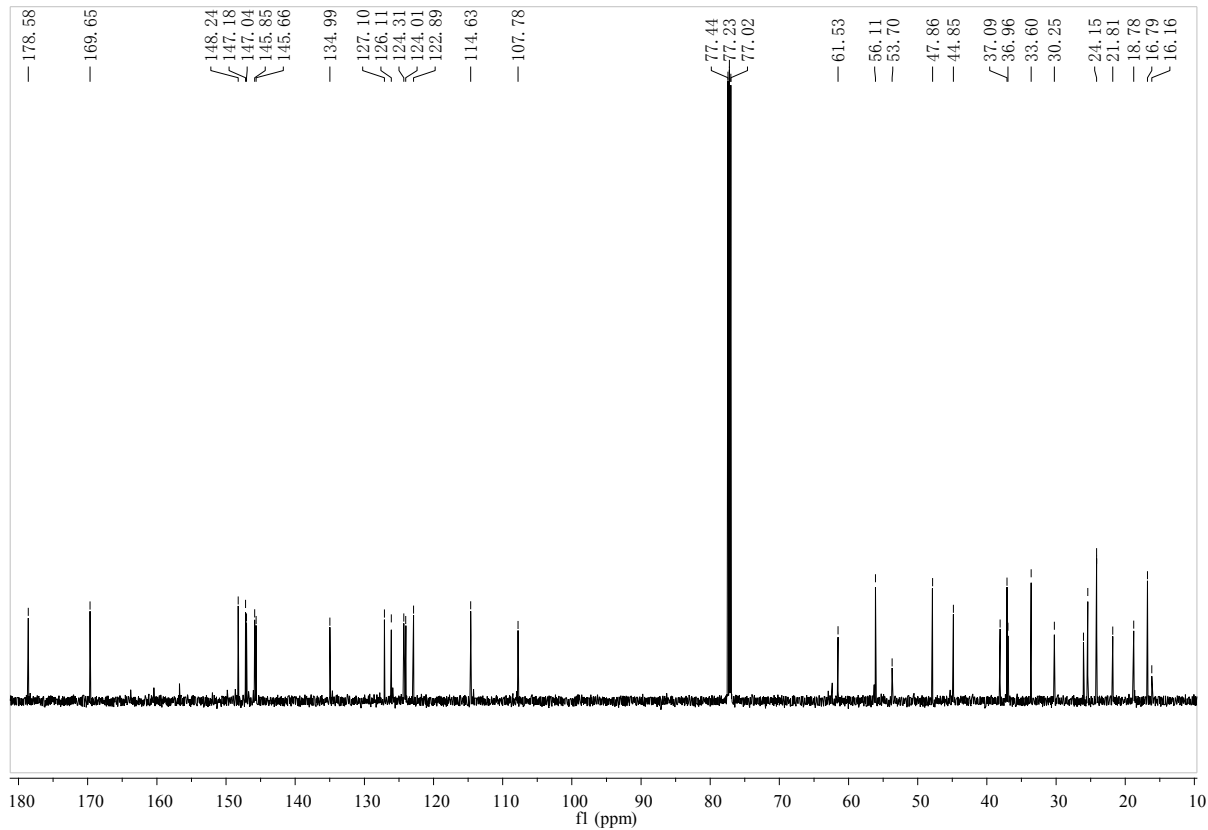

Figure S22.  $^{13}\text{C-NMR}$  spectrum of the target compound (**4d**) in  $\text{CDCl}_3$

JN-XCQ #81 RT: 0.71 AV: 1 SB: 48 0.04-0.45 NL: 4.88E6  
T: - c ESI Q1MS [100.000-1000.000]

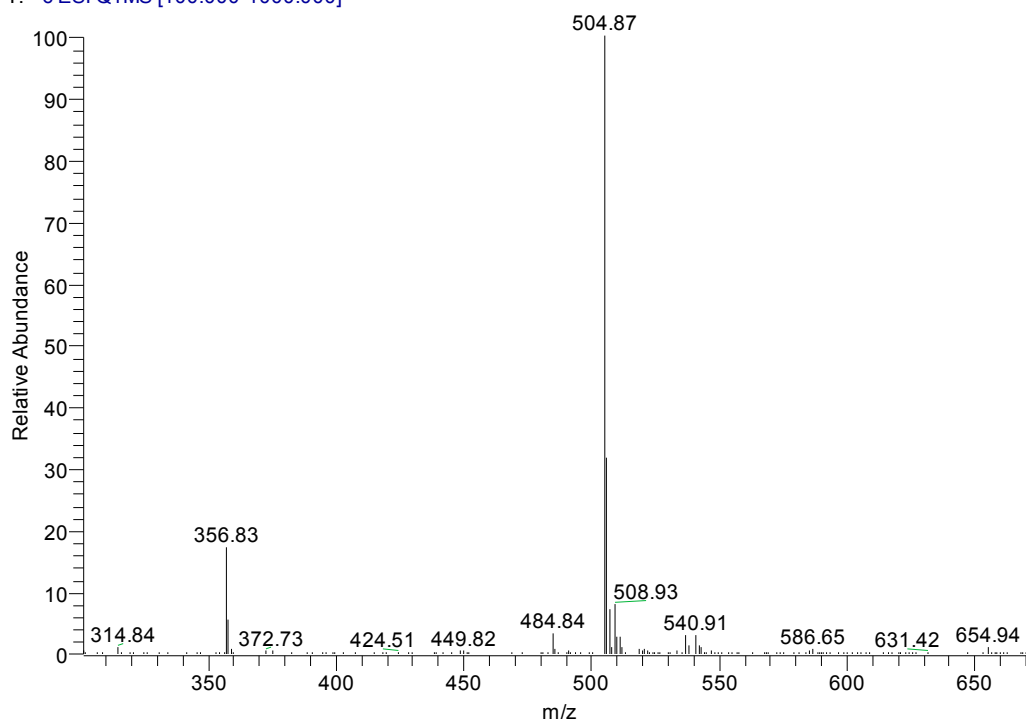

Figure S23. ESI-MS spectrum of the target compound (4d)

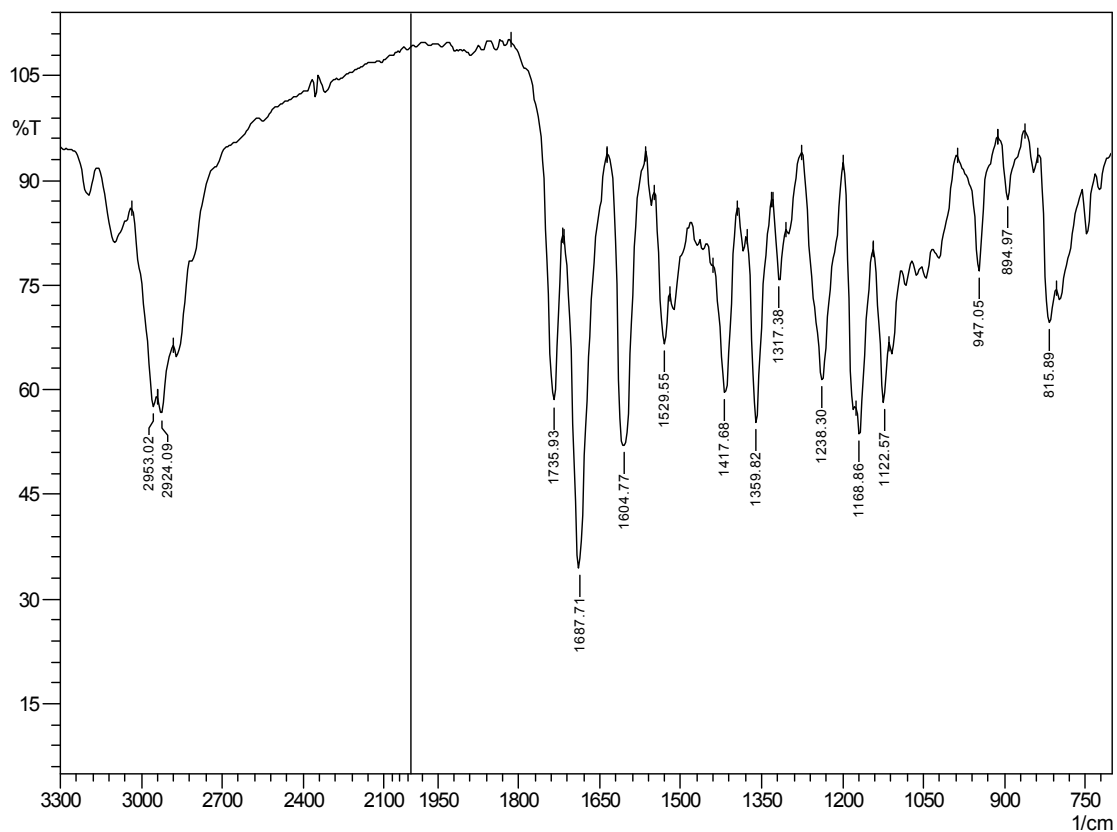

Figure S24. FTIR spectrum of the target compound (4e)

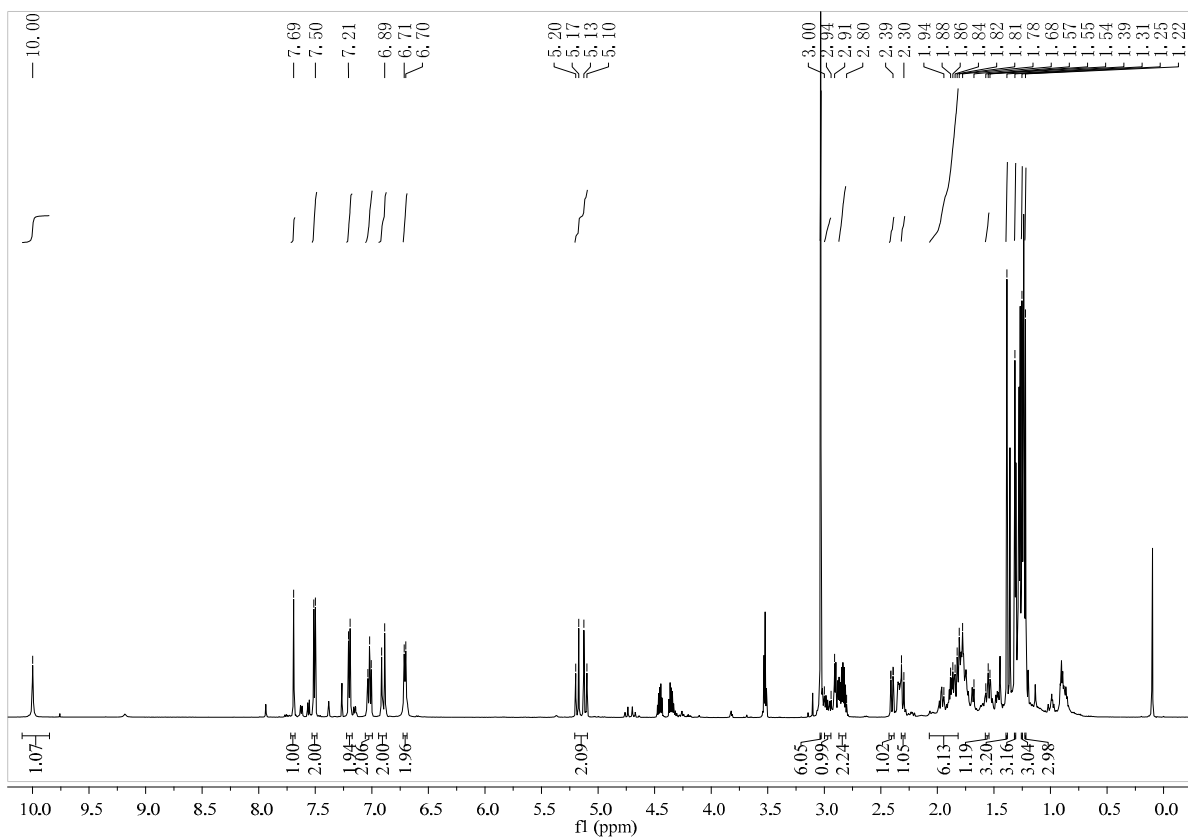

Figure S25.  $^1\text{H-NMR}$  spectrum of the target compound (**4e**) in  $\text{CDCl}_3$

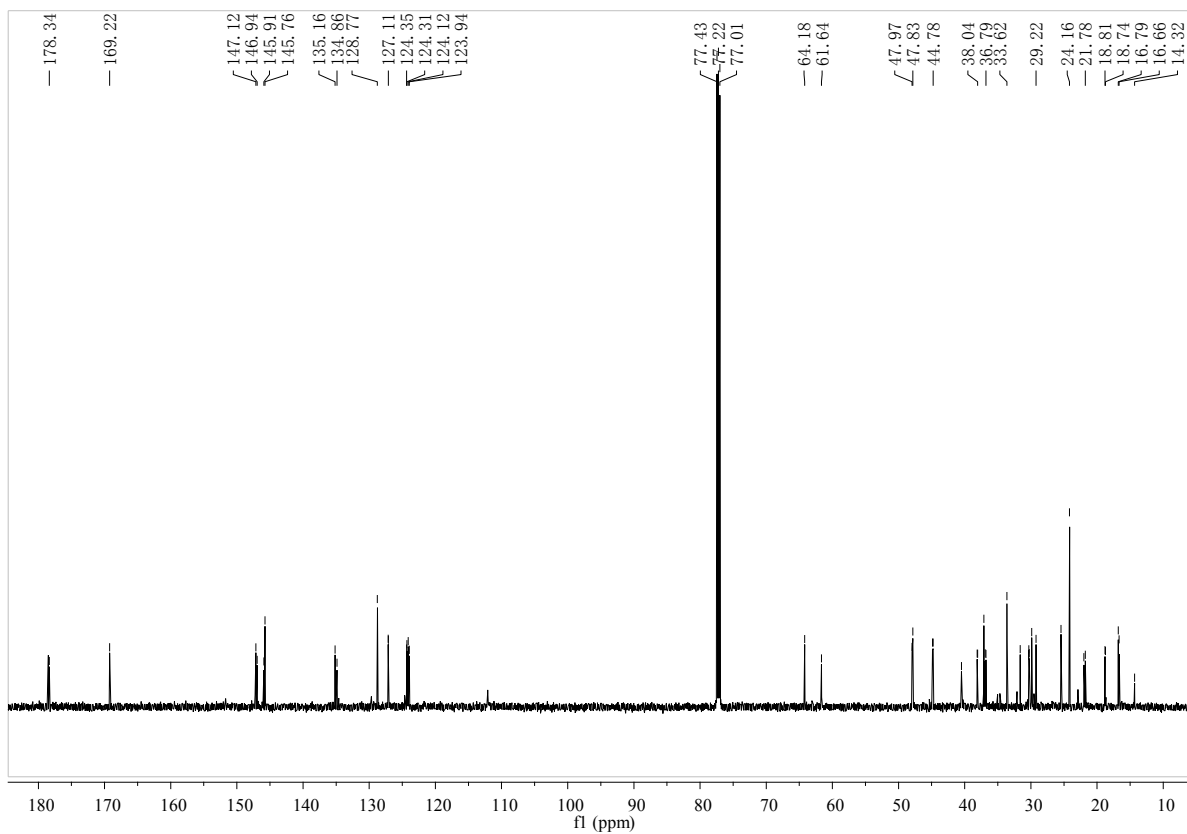

Figure S26.  $^{13}\text{C-NMR}$  spectrum of the target compound (**4e**) in  $\text{CDCl}_3$

JN-NN #388 RT: 3.44 AV: 1 SB: 58 0.07-0.58 NL: 2.50E5  
T: - c ESI Q1MS [100.000-1000.000]

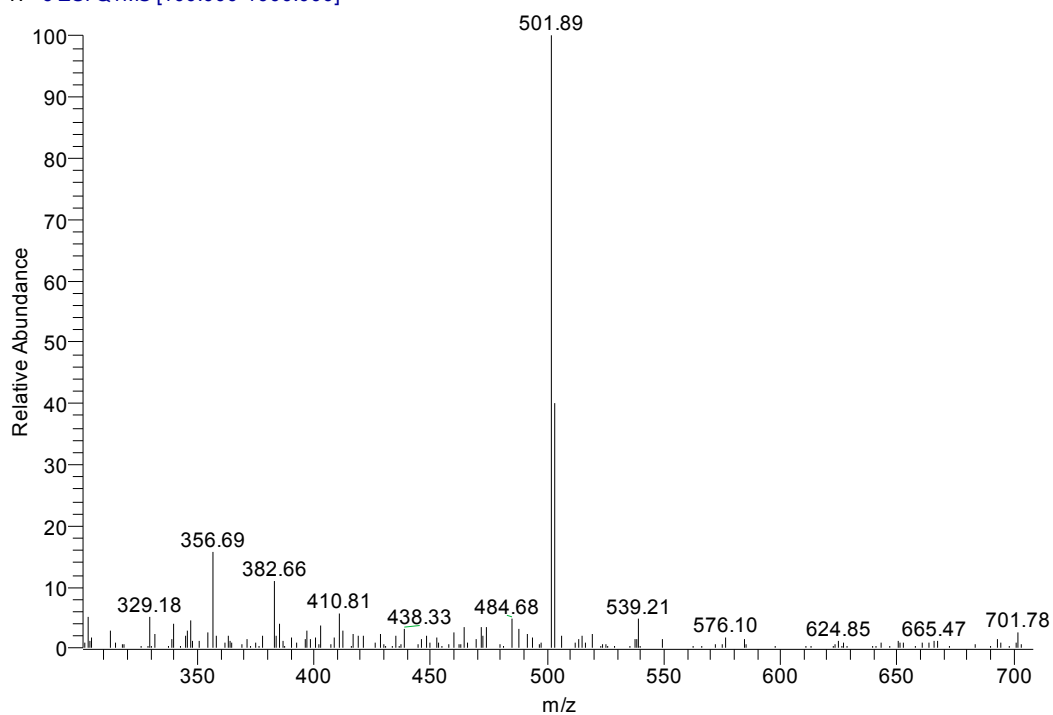

Figure S27. ESI-MS spectrum of the target compound (4e)

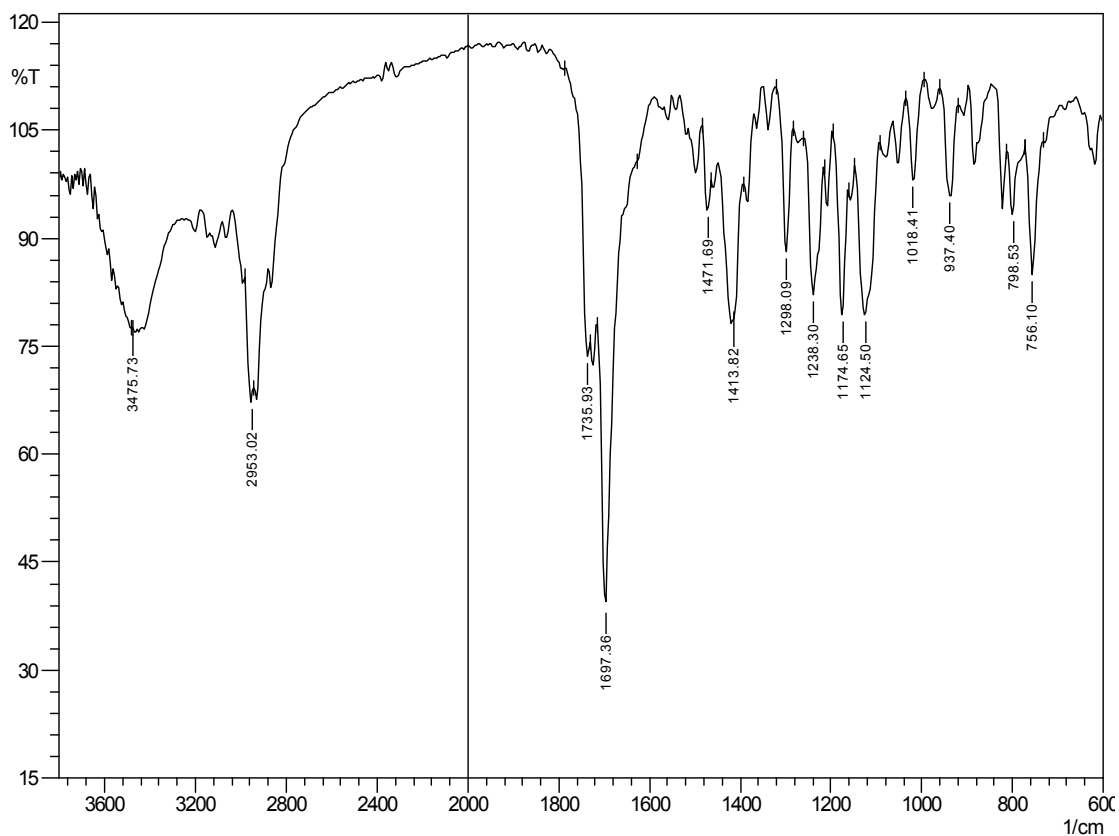

Figure S28. FTIR spectrum of the target compound (4f)

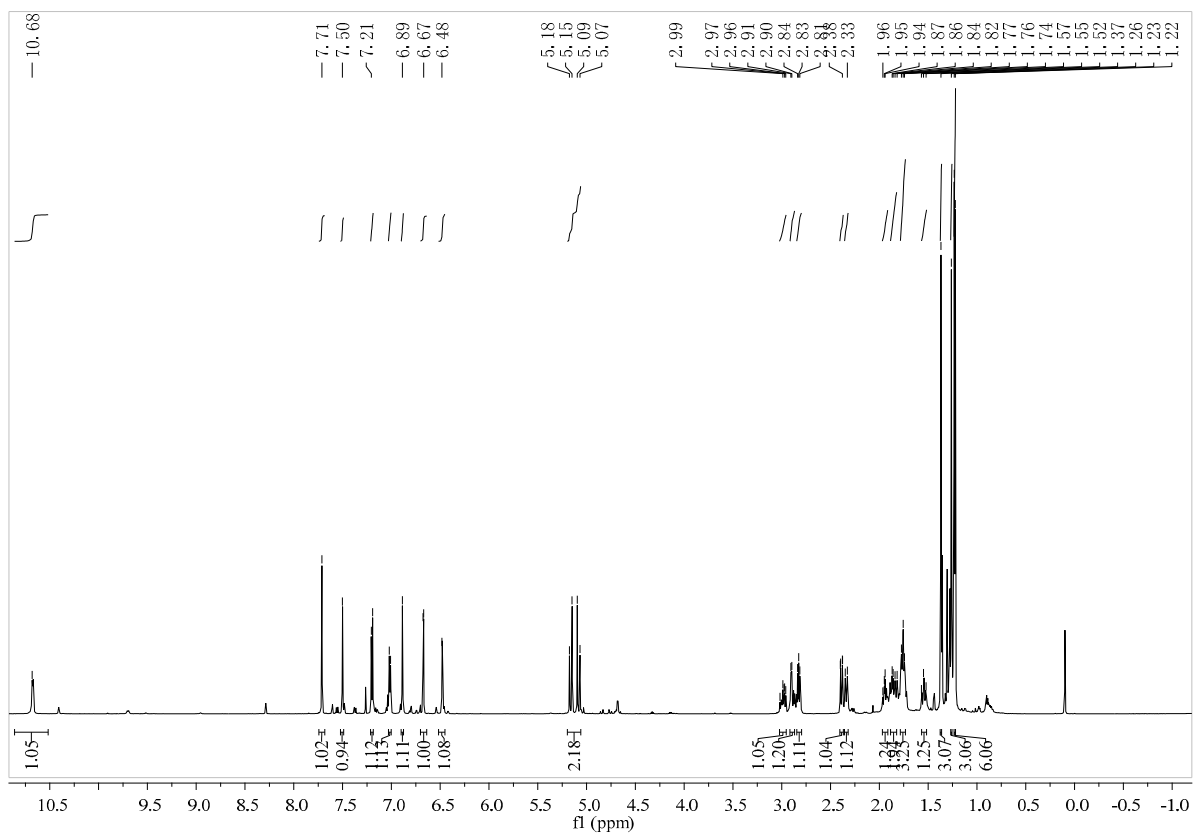

Figure S29.  $^1\text{H-NMR}$  spectrum of the target compound (**4f**) in  $\text{CDCl}_3$

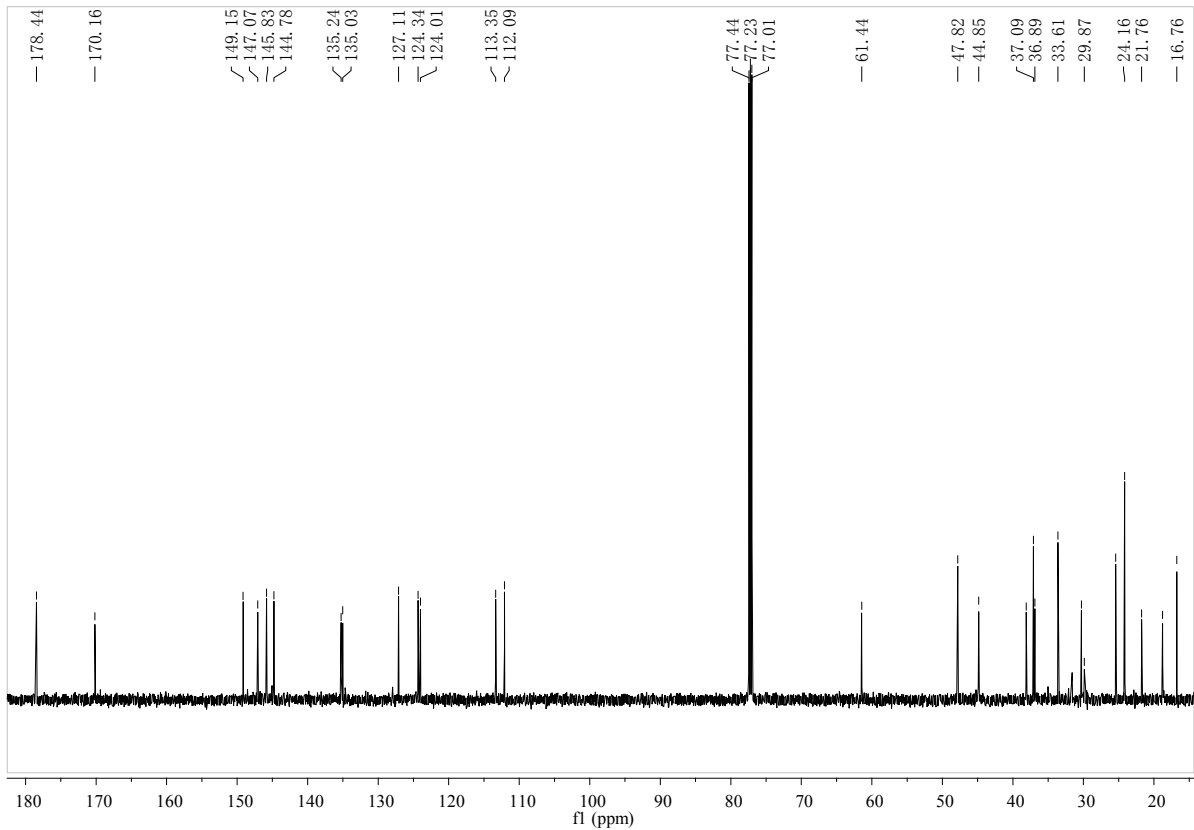

Figure S30.  $^{13}\text{C-NMR}$  spectrum of the target compound (**4f**) in  $\text{CDCl}_3$

JN-THF #54 RT: 0.48 AV: 1 SB: 28 0.02-0.26 NL: 6.73E6  
T: -c ESI Q1MS [100.000-1000.000]

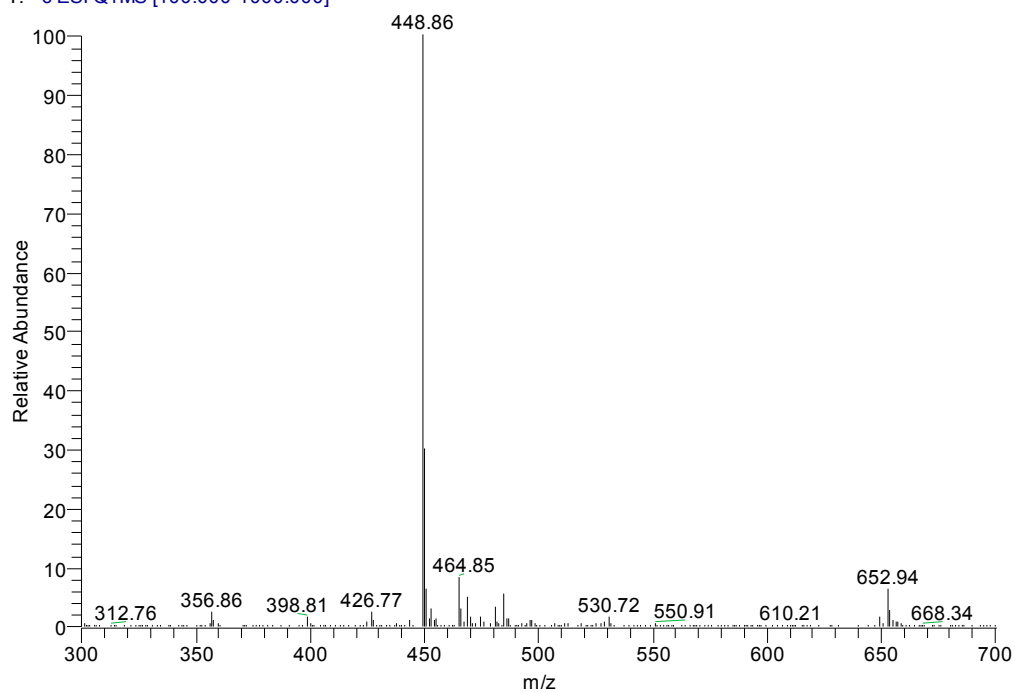

Figure S31. ESI-MS spectrum of the target compound (4f)

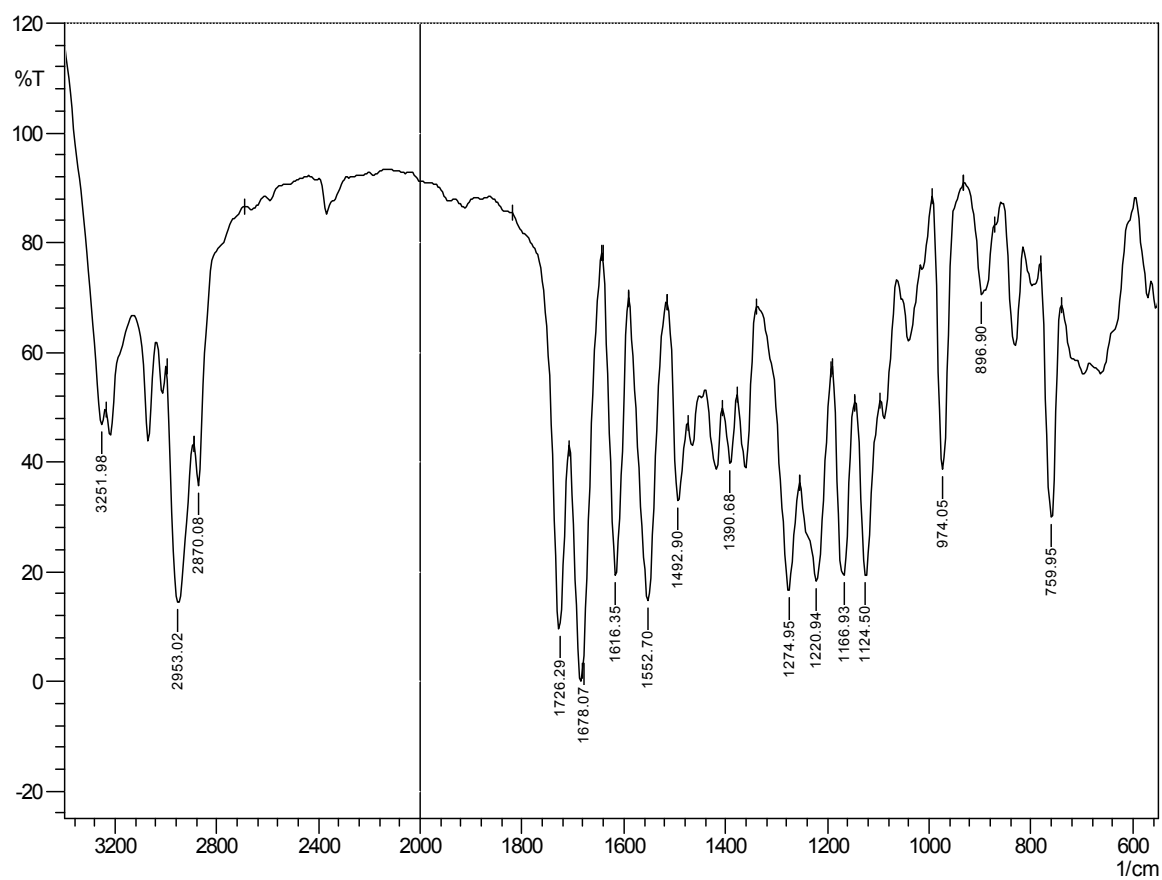

Figure S32. FTIR spectrum of the target compound (4g)



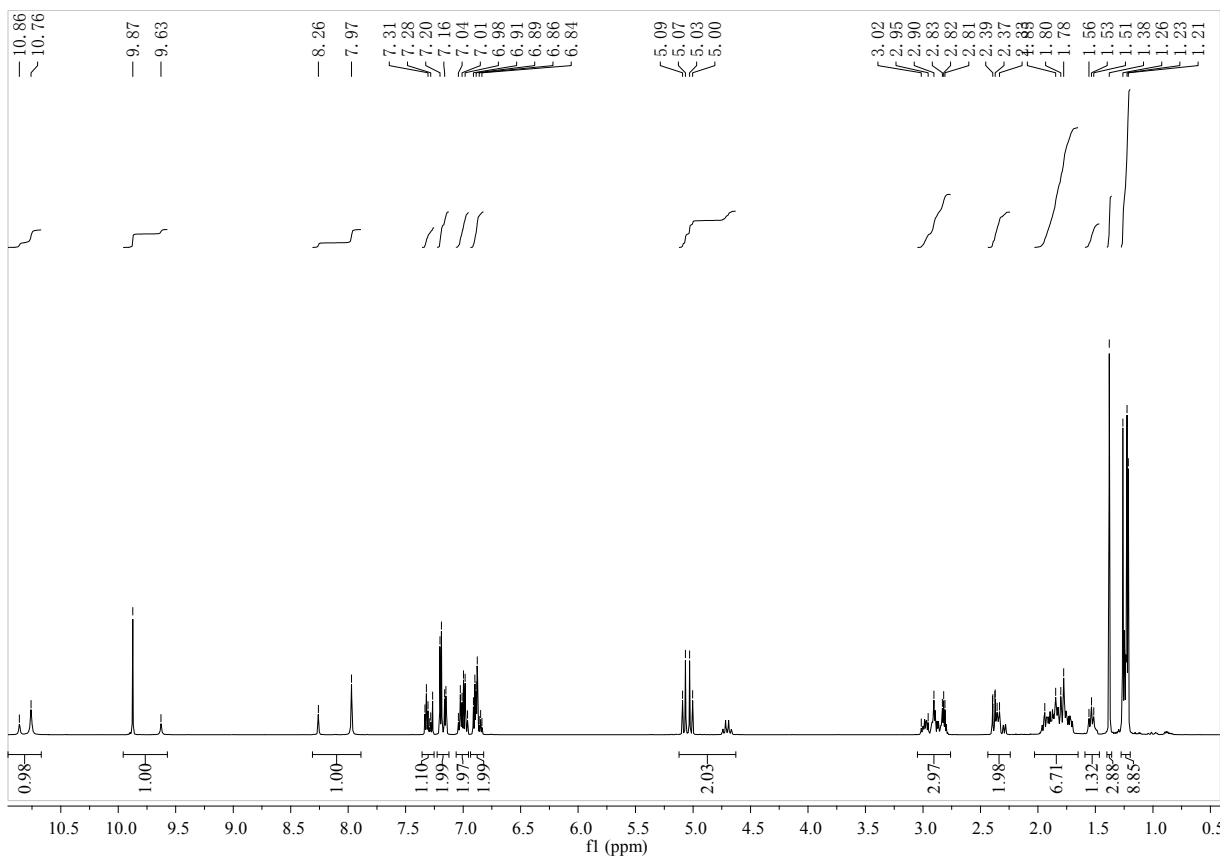

Figure S33.  $^1\text{H-NMR}$  spectrum of the target compound (**4g**) in  $\text{CDCl}_3$

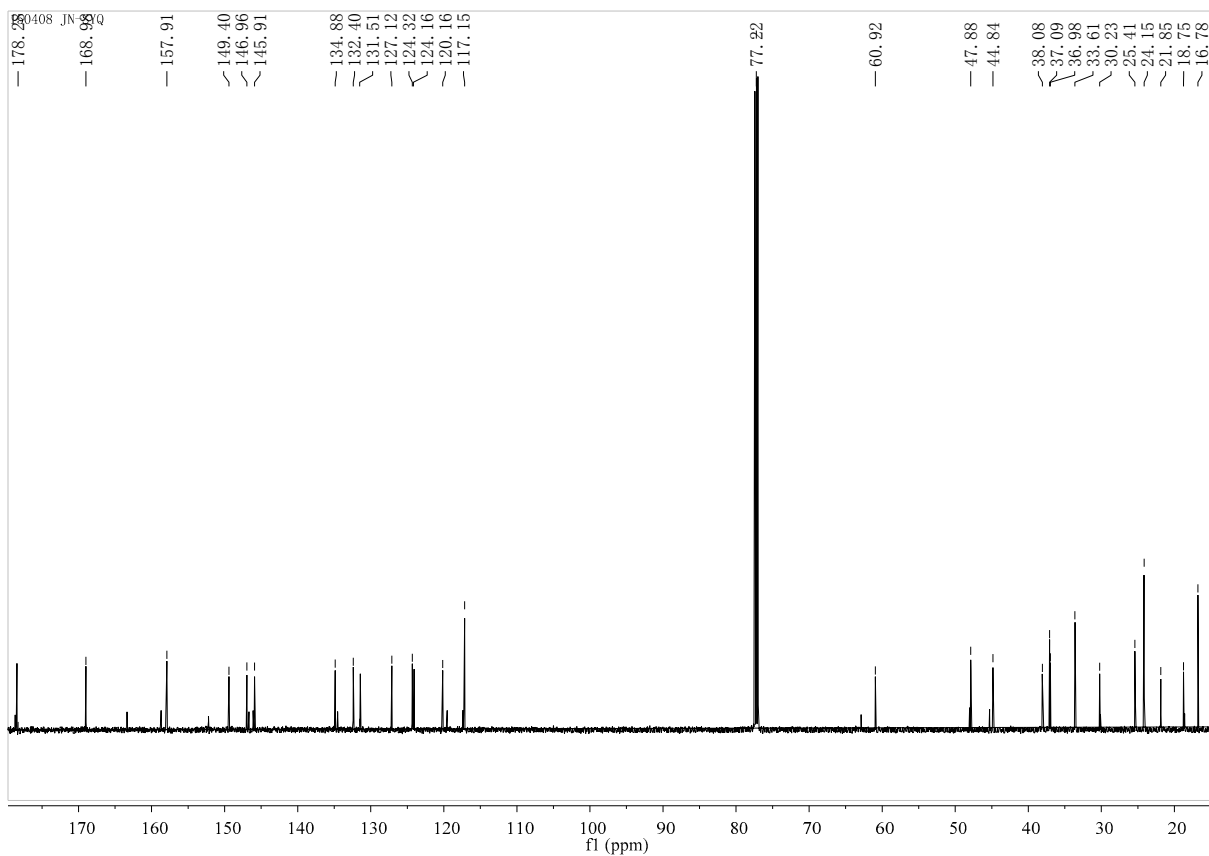

Figure S34.  $^{13}\text{C-NMR}$  spectrum of the target compound (**4g**) in  $\text{CDCl}_3$

JN-SYQ #77 RT: 0.68 AV: 1 NL: 7.07E6  
T: - c ESI Q1MS [100.000-1000.000]

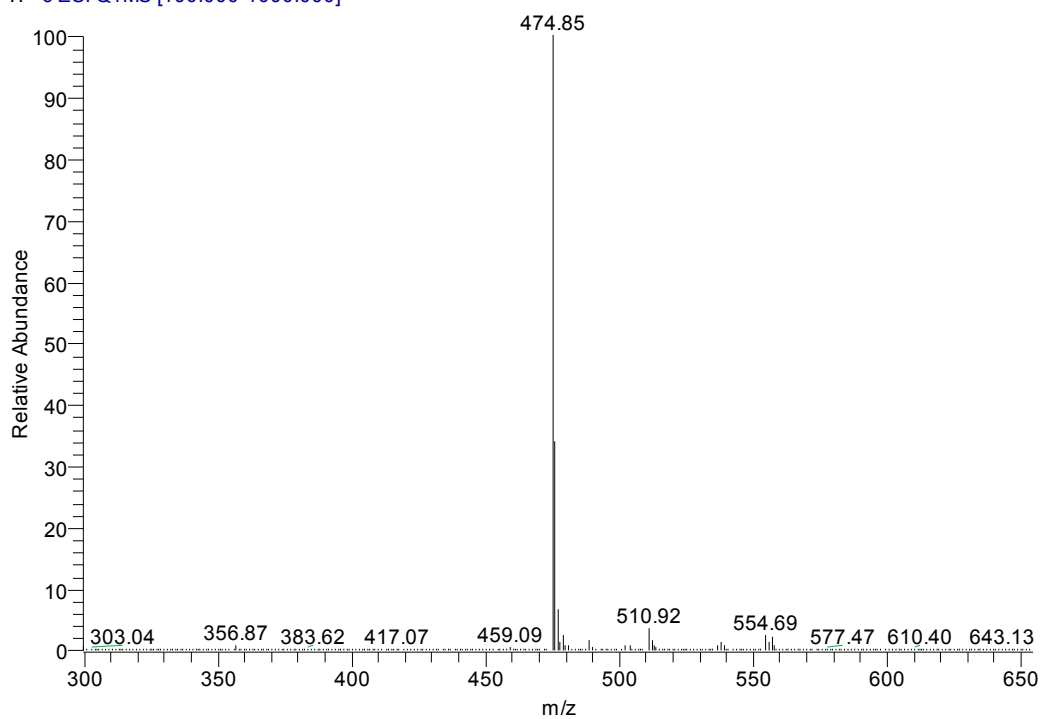

Figure S35. ESI-MS spectrum of the target compound (4g)

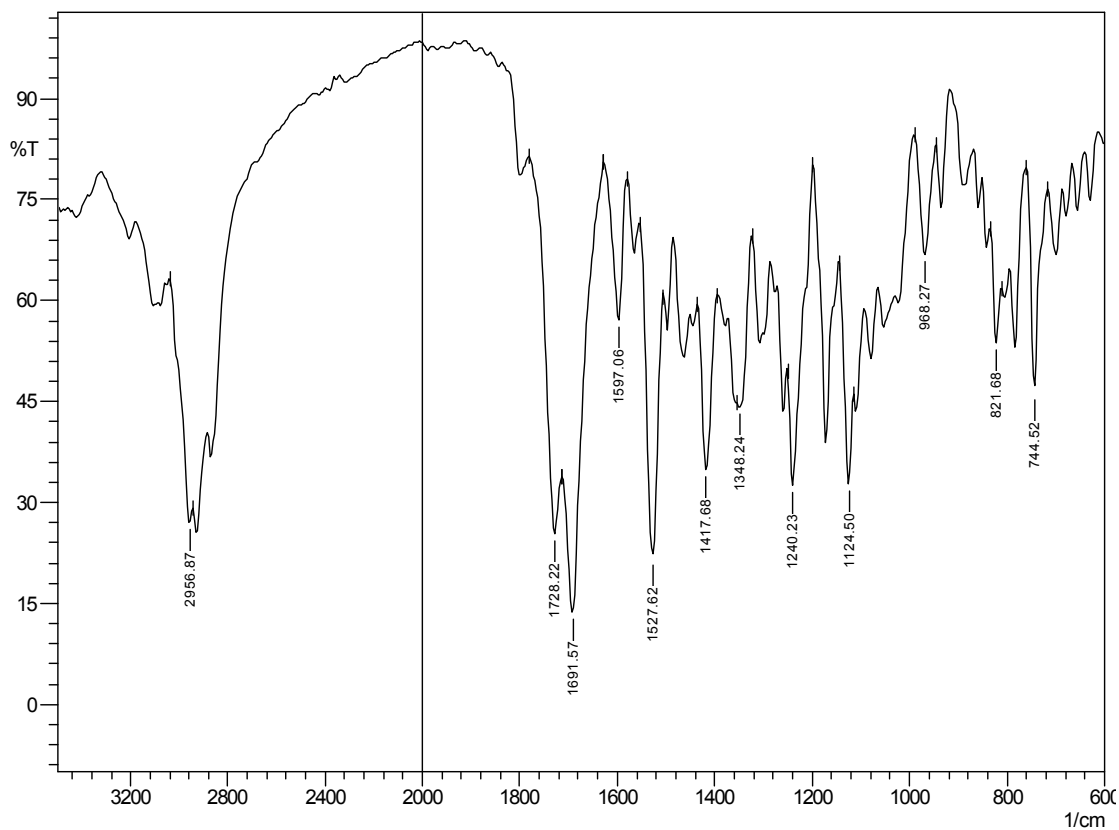

Figure S36. FTIR spectrum of the target compound (4h)

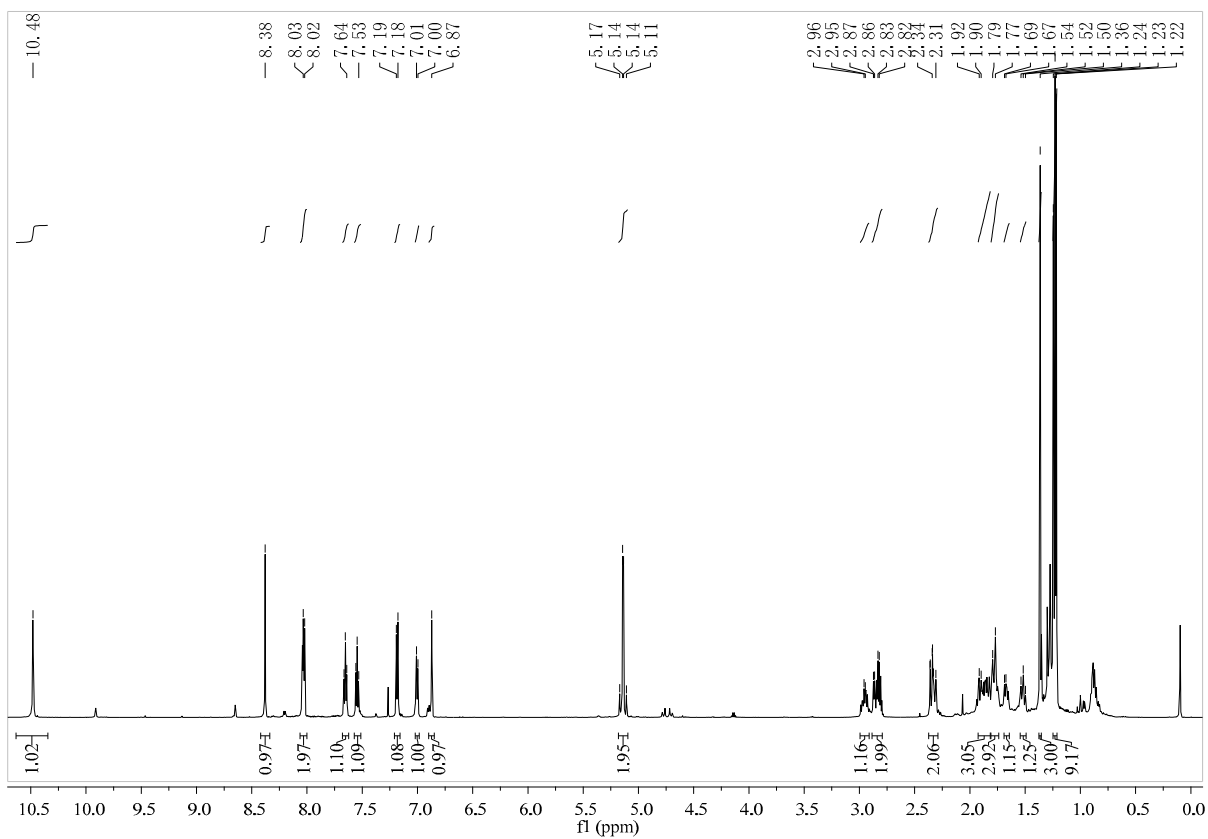

Figure S37.  $^1\text{H-NMR}$  spectrum of the target compound (**4h**) in  $\text{CDCl}_3$

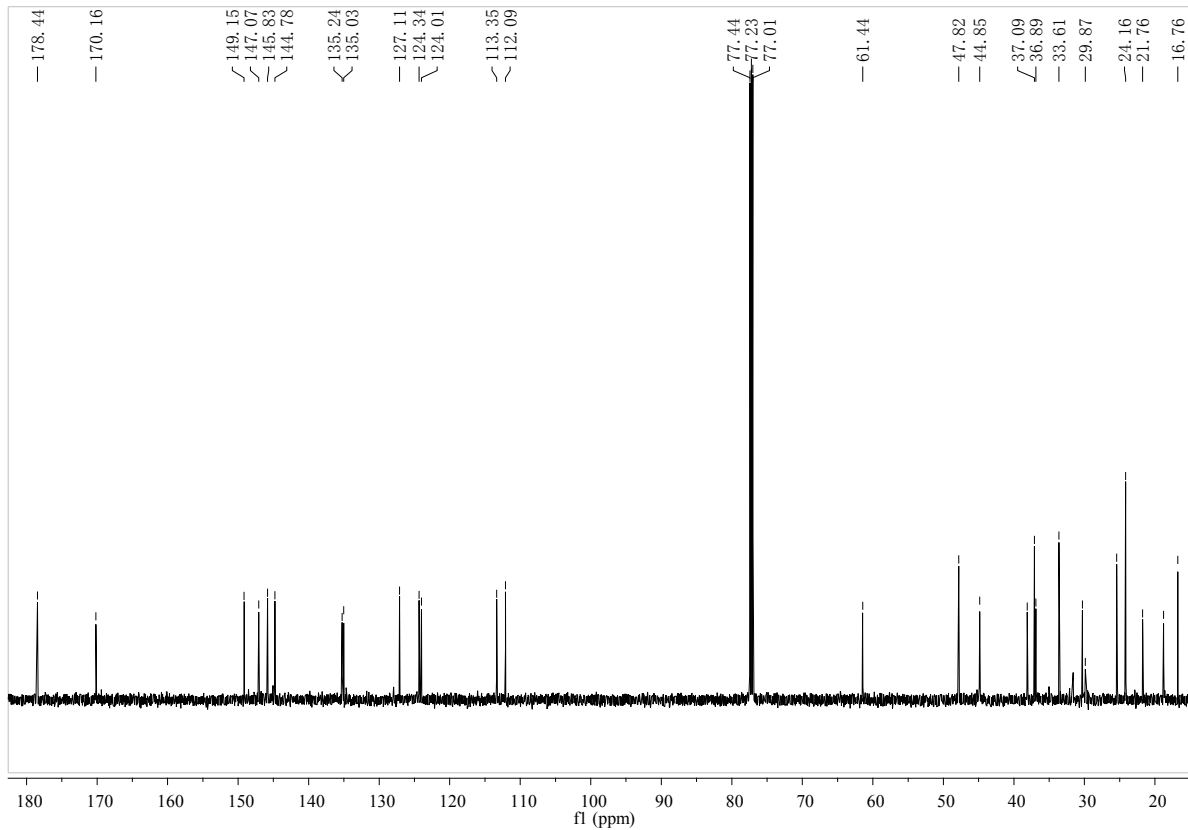

Figure S38.  $^{13}\text{C-NMR}$  spectrum of the target compound (**4h**) in  $\text{CDCl}_3$

JN-2-NO #88 RT: 0.78 AV: 1 NL: 6.94E6  
T: - c ESI Q1MS [100.000-1000.000]

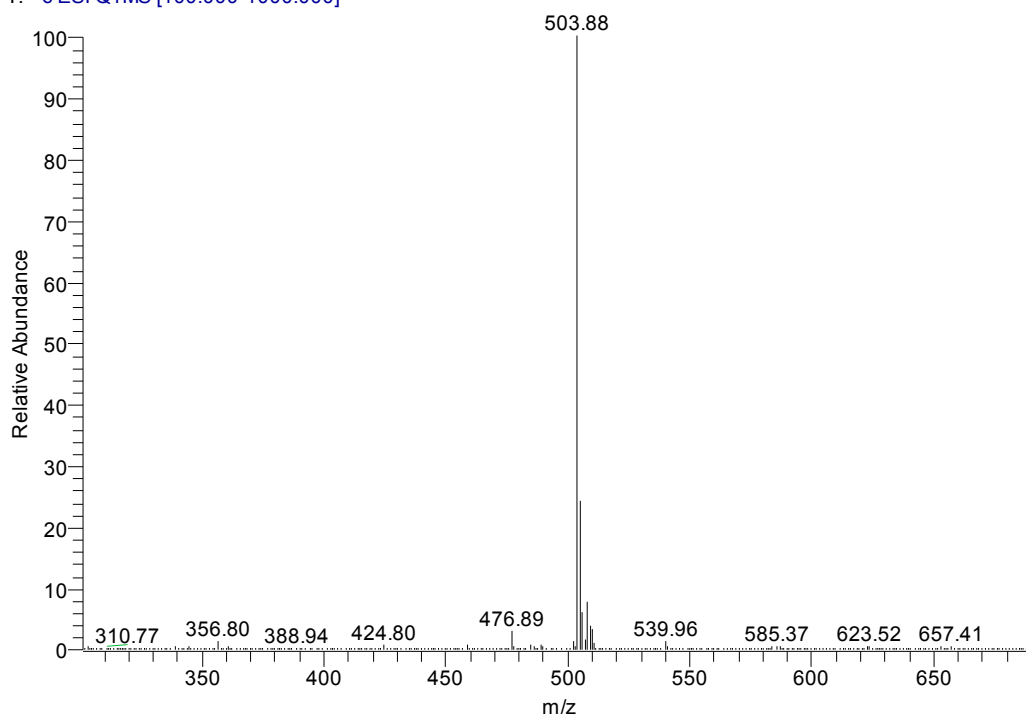

Figure S39. ESI-MS spectrum of the target compound (4h)

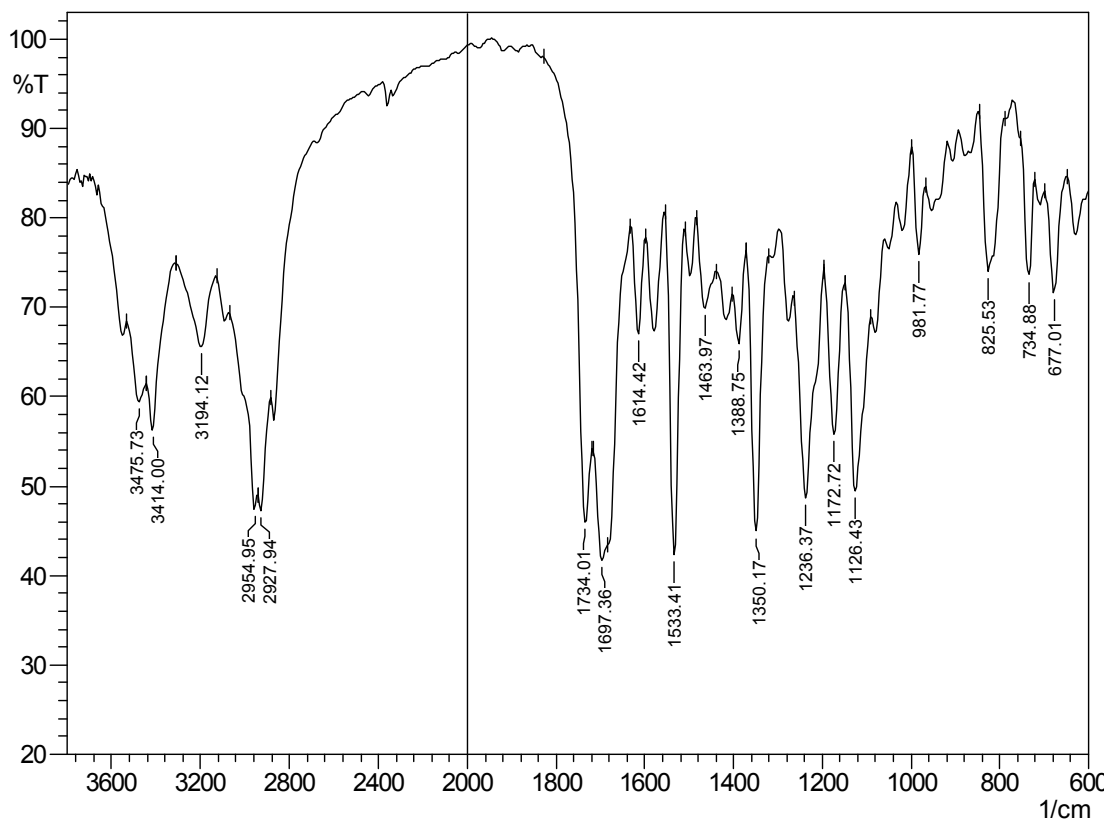

Figure S40. FTIR spectrum of the target compound (4i)

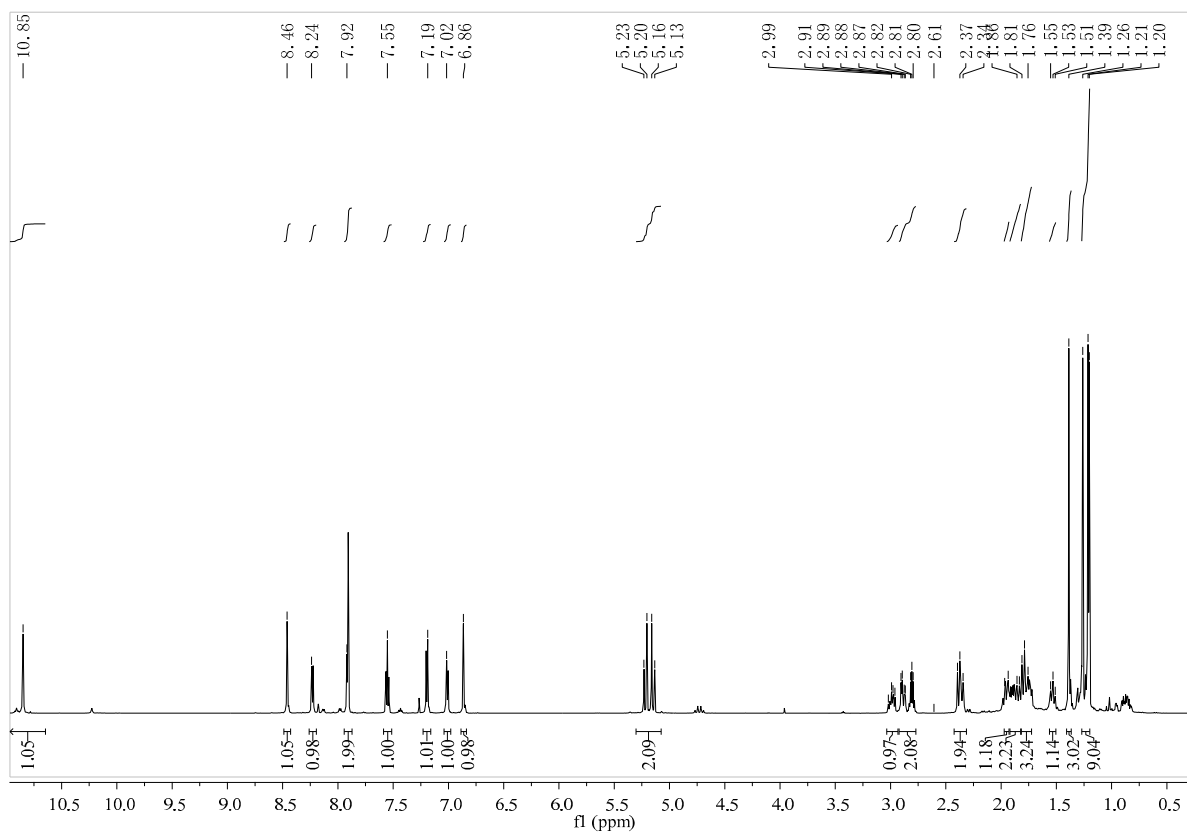

Figure S41.  $^1\text{H-NMR}$  spectrum of the target compound (**4i**) in  $\text{CDCl}_3$

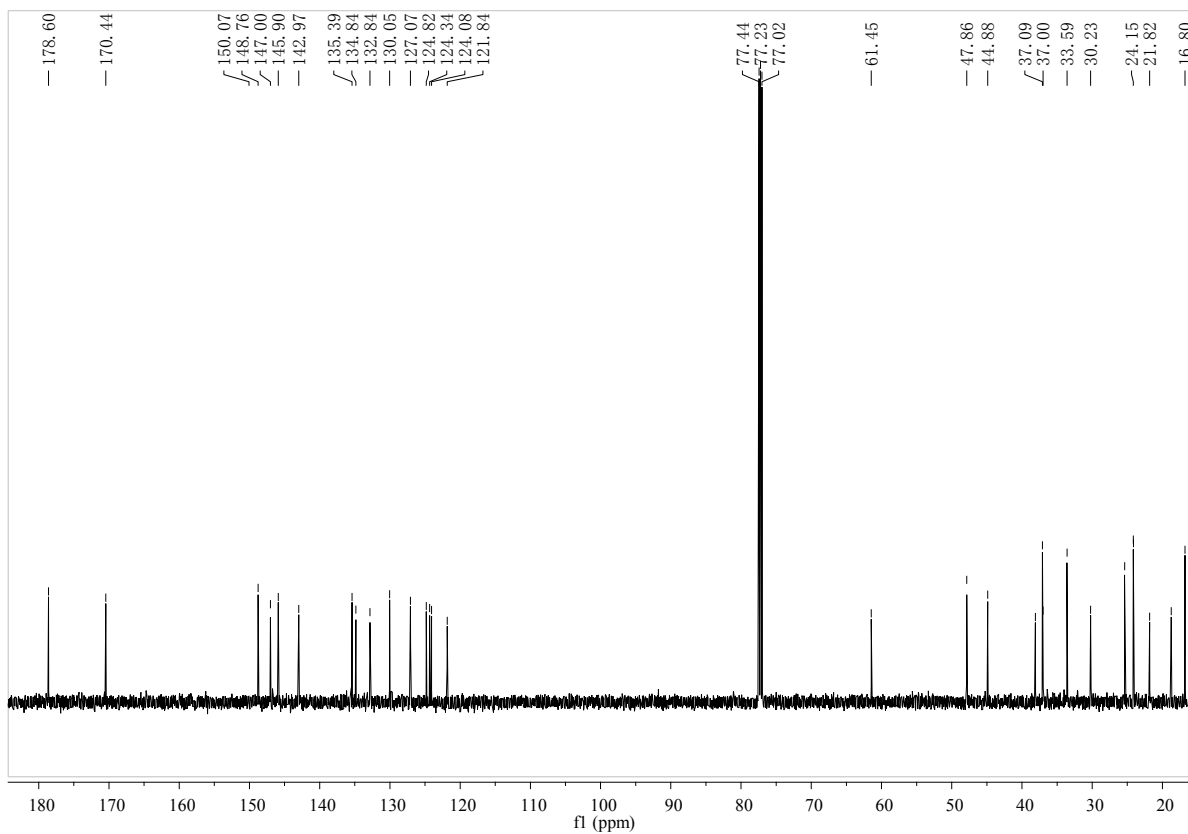

Figure S42.  $^{13}\text{C-NMR}$  spectrum of the target compound (**4i**) in  $\text{CDCl}_3$

JN-JXJ #95 RT: 0.84 AV: 1 SB: 123 1.64-2.25, 0.00-0.46 NL: 8.31E5  
T: - c ESI Q1MS [100.000-1000.000]

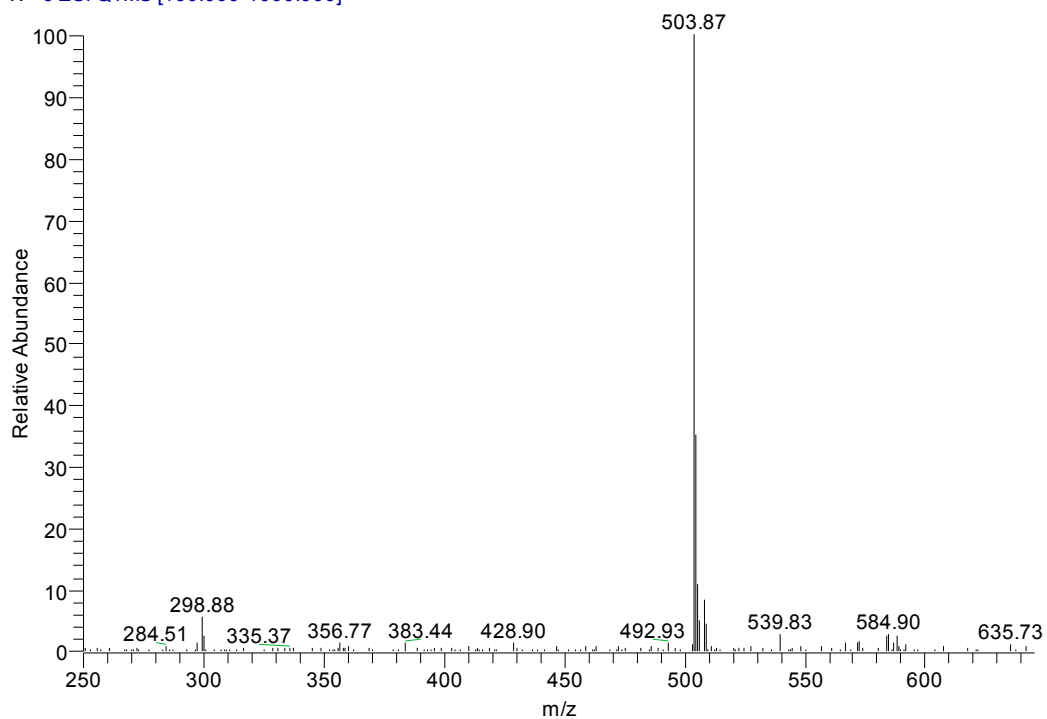

Figure S43. ESI-MS spectrum of the target compound (4i)

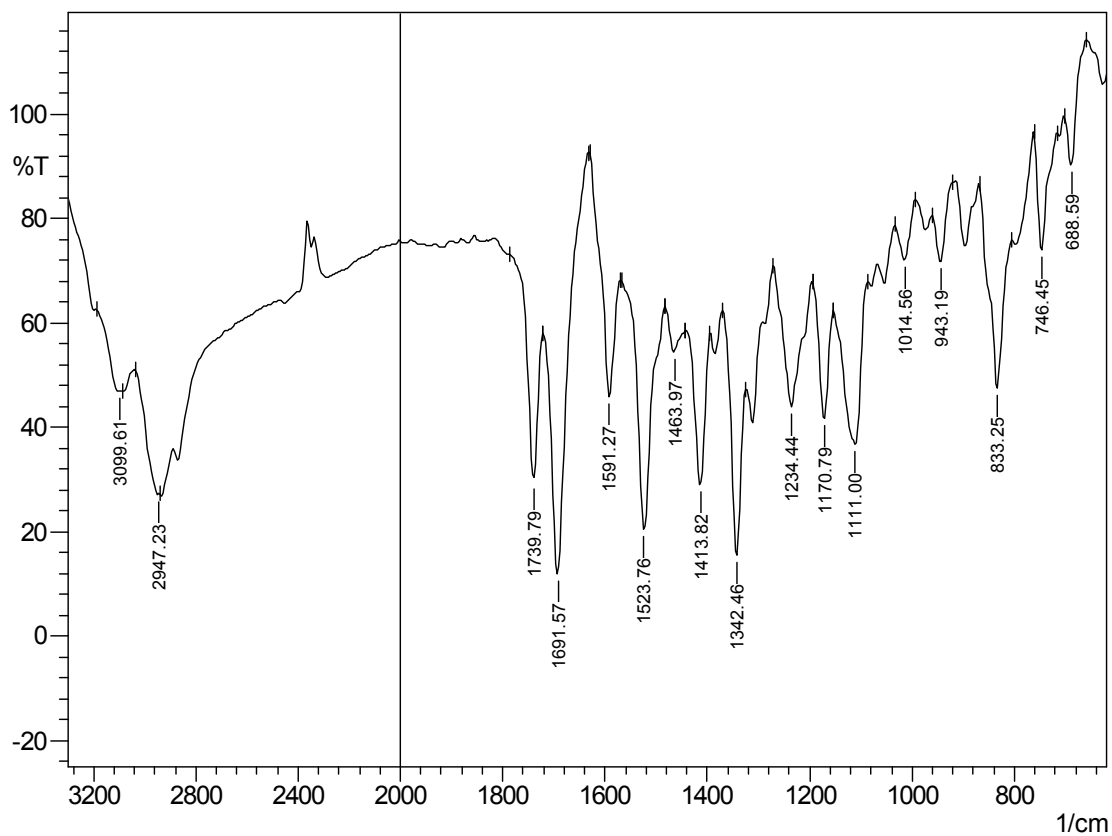

Figure S44. FTIR spectrum of the target compound (4j)

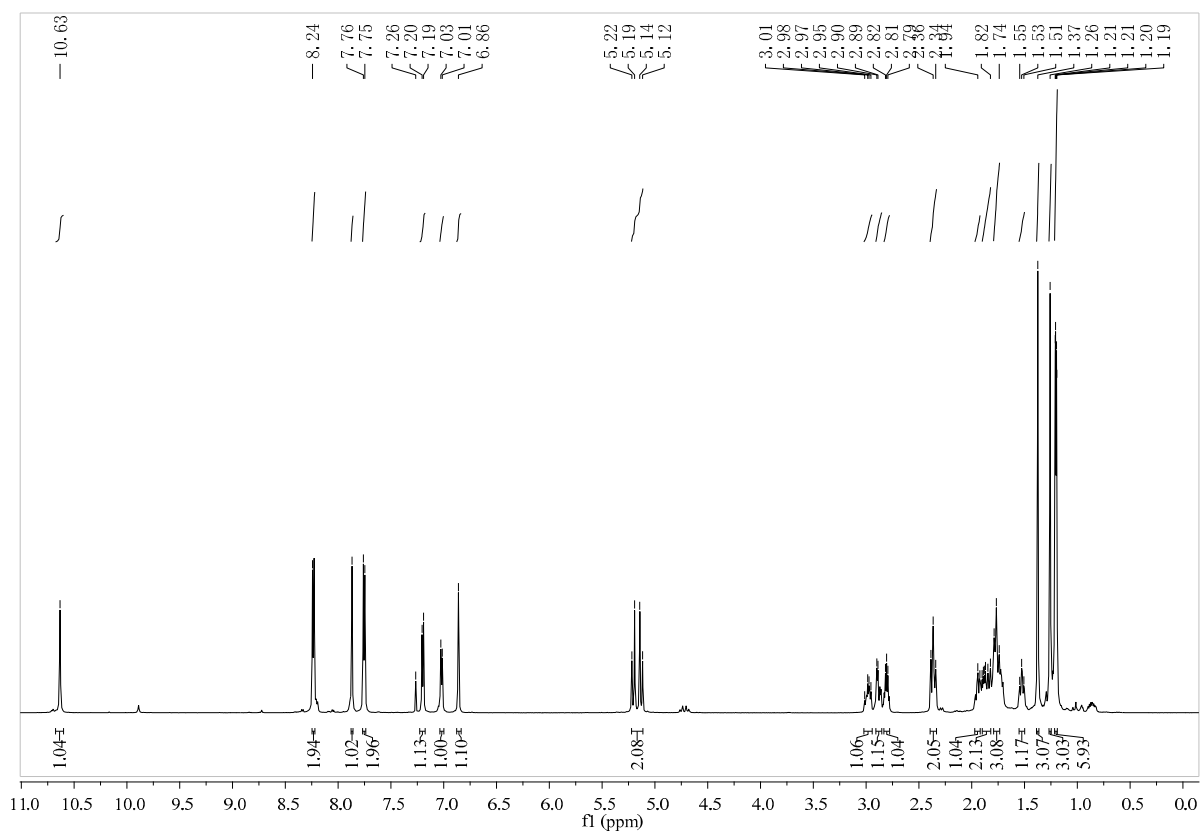

Figure S45.  $^1\text{H-NMR}$  spectrum of the target compound (**4j**) in  $\text{CDCl}_3$

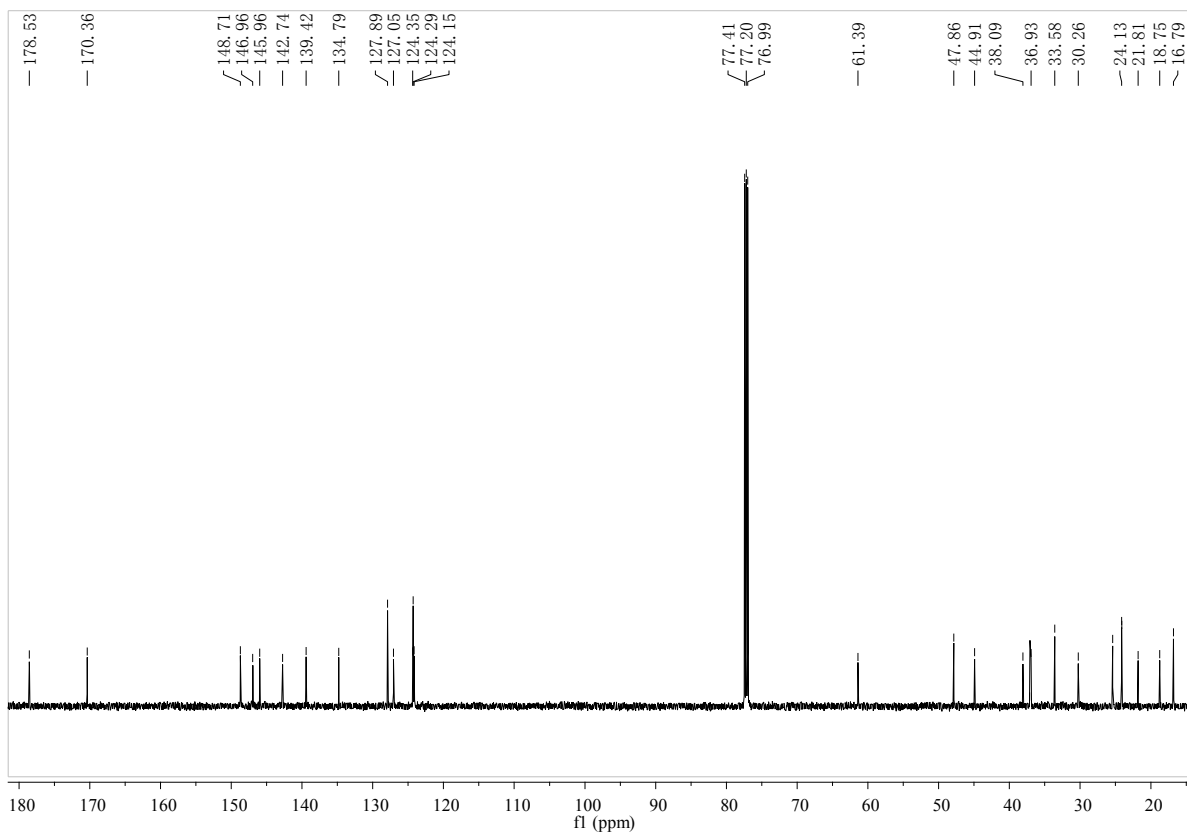

Figure S46.  $^{13}\text{C-NMR}$  spectrum of the target compound (**4j**) in  $\text{CDCl}_3$

JN-DXJ #131 RT: 1.16 AV: 1 SB: 75 0.05-0.71 NL: 1.62E6  
T: - c ESI Q1MS [100.000-1000.000]

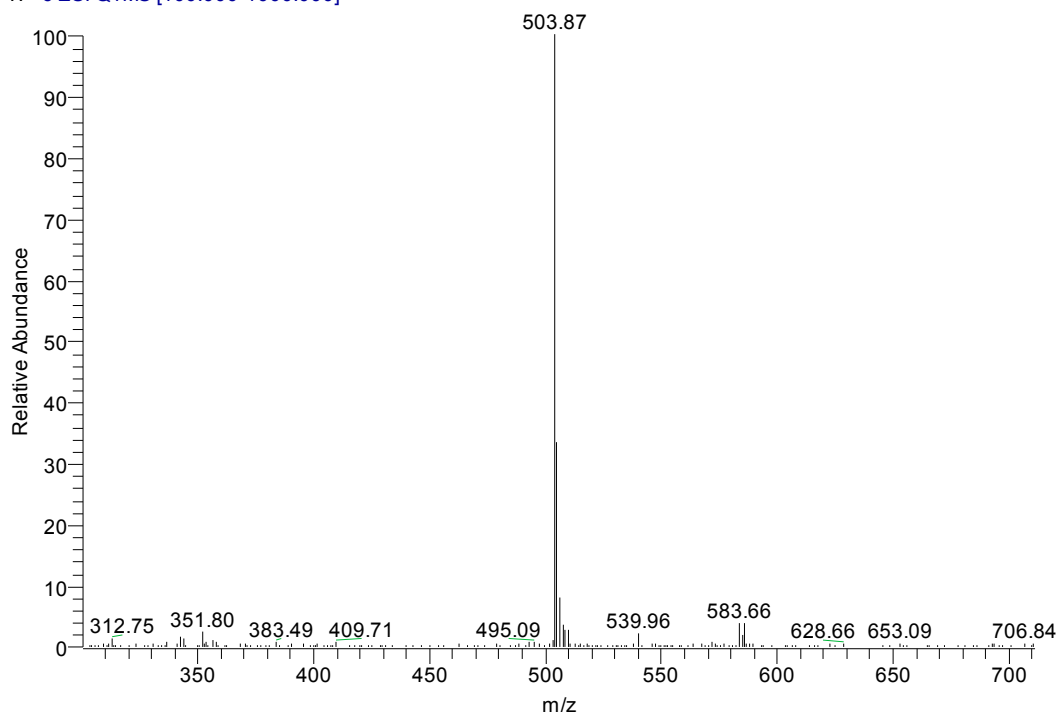

Figure S47. ESI-MS spectrum of the target compound (4j)

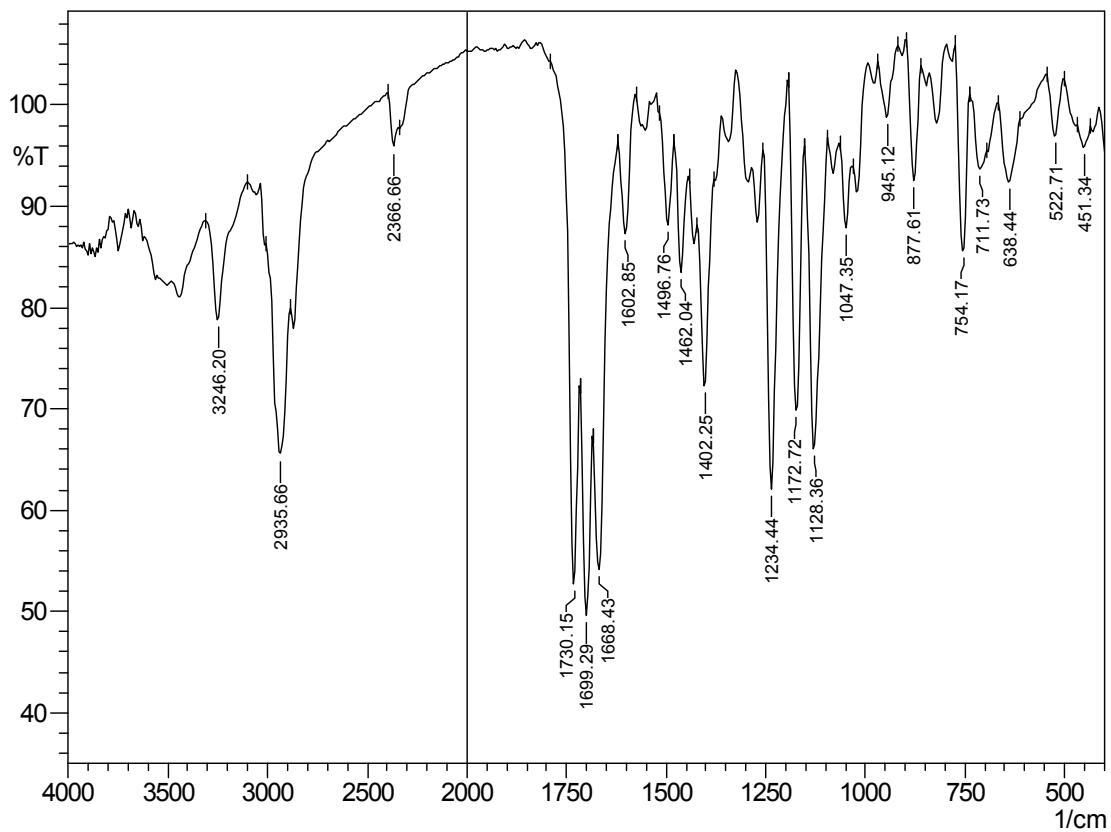

Figure S48. FTIR spectrum of the target compound (4k)



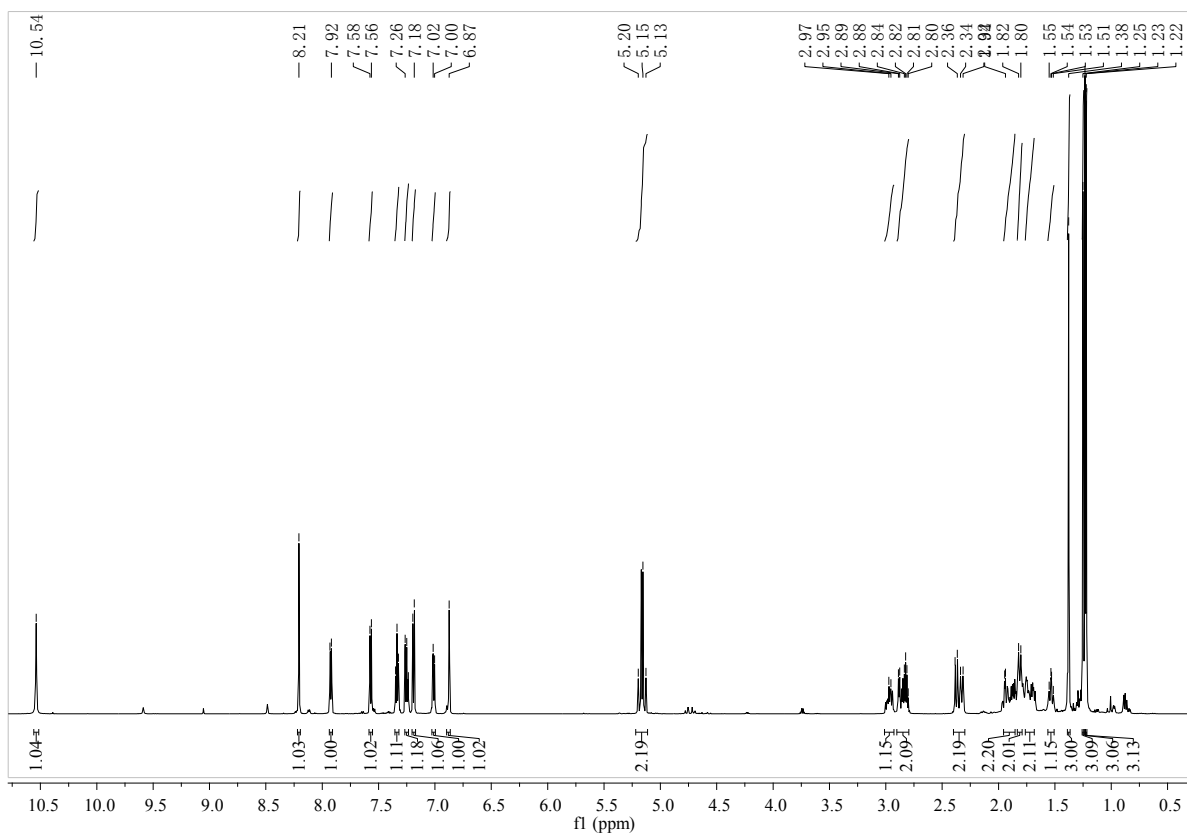

Figure S49.  $^1\text{H-NMR}$  spectrum of the target compound (**4k**) in  $\text{CDCl}_3$

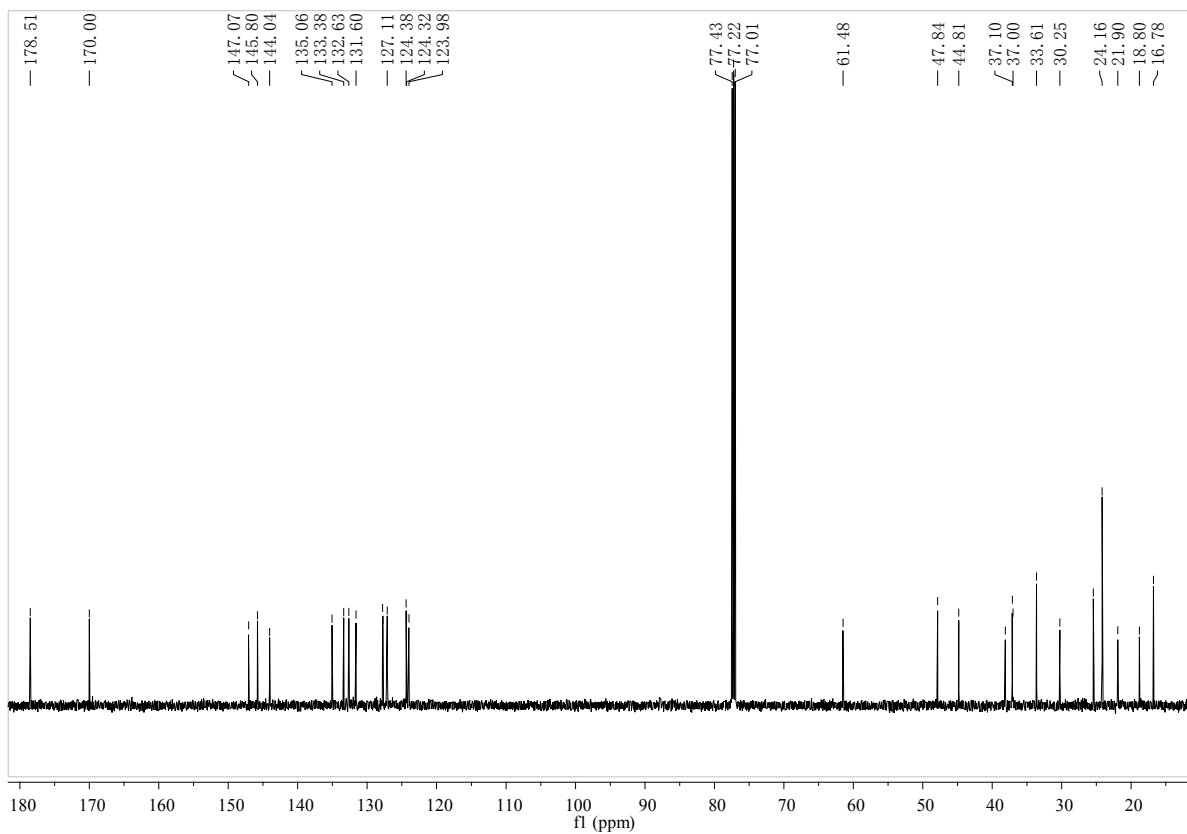

Figure S50.  $^{13}\text{C-NMR}$  spectrum of the target compound (**4k**) in  $\text{CDCl}_3$

JN-2-BR #74 RT: 0.65 AV: 1 SB: 43 0.00-0.37 NL: 2.15E6  
T: - c ESI Q1MS [100.000-1000.000]

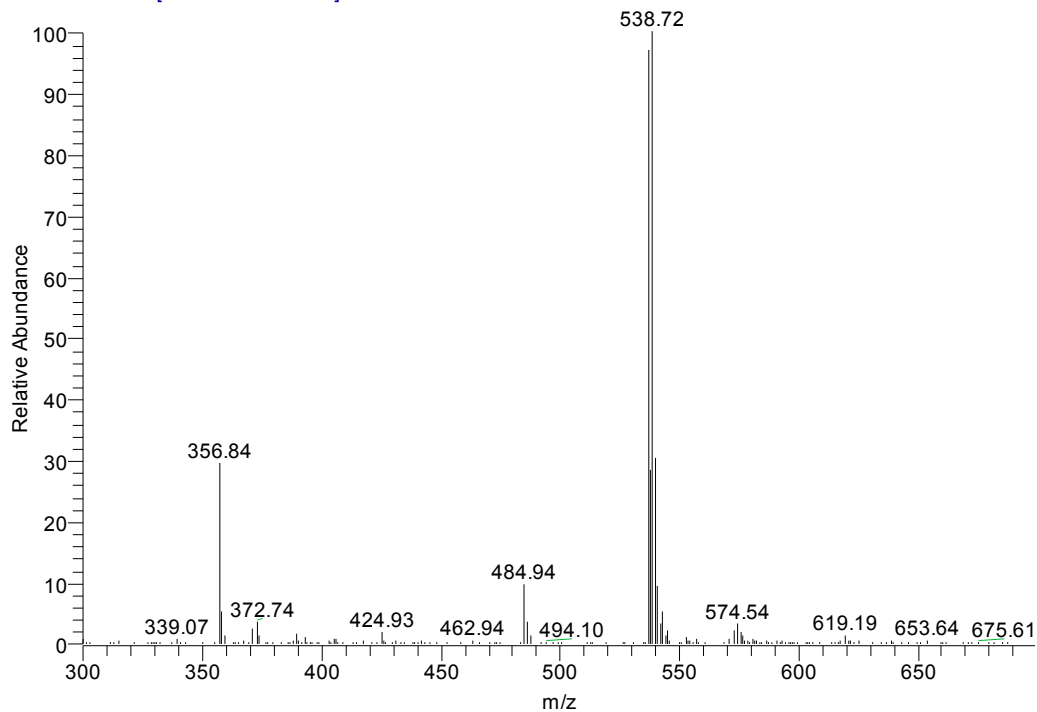

Figure S51. ESI-MS spectrum of the target compound (4k)

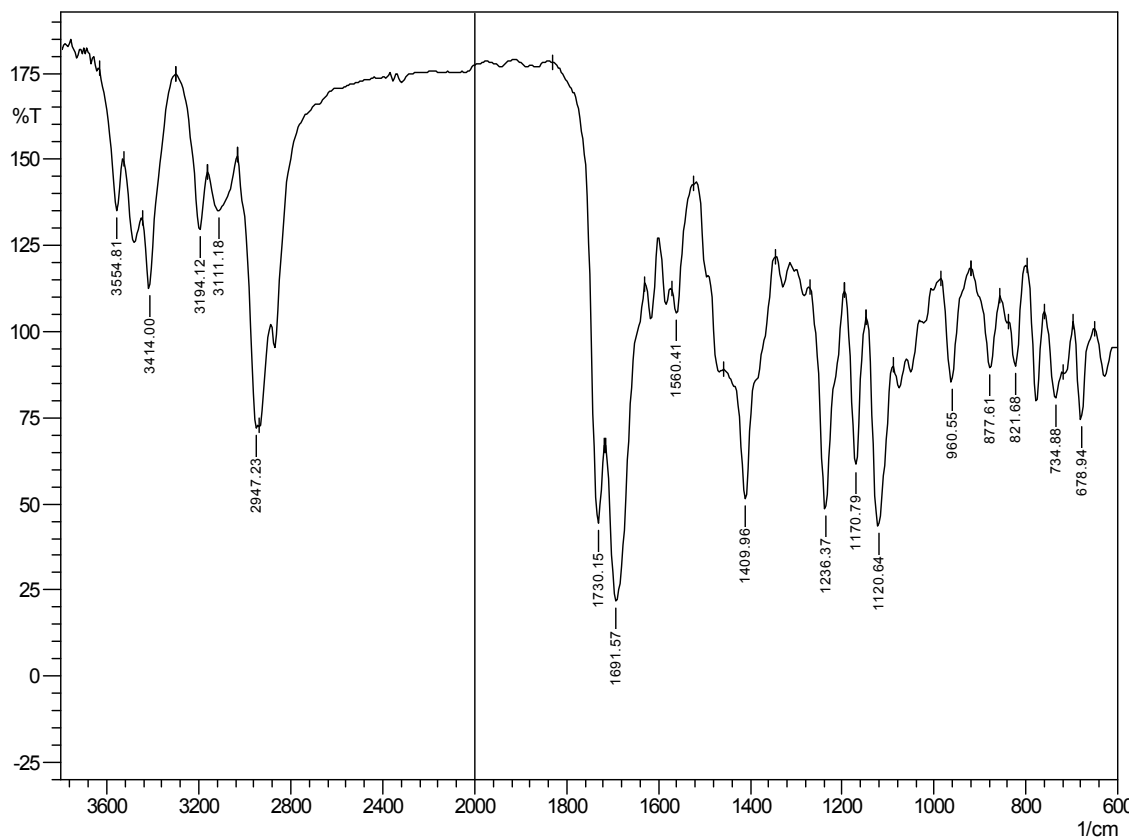

Figure S52. FTIR spectrum of the target compound (4l)

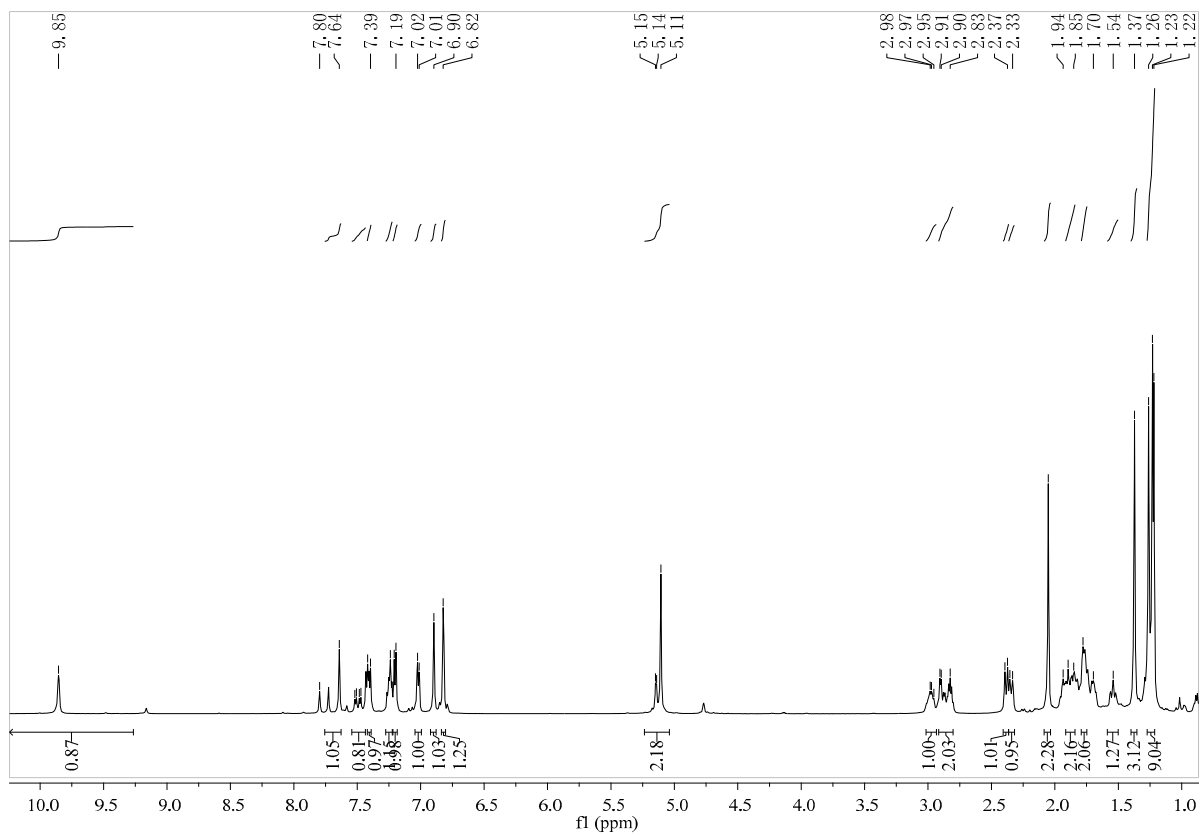

Figure S53.  $^1\text{H}$ -NMR spectrum of the target compound (**4**) in  $\text{CDCl}_3$

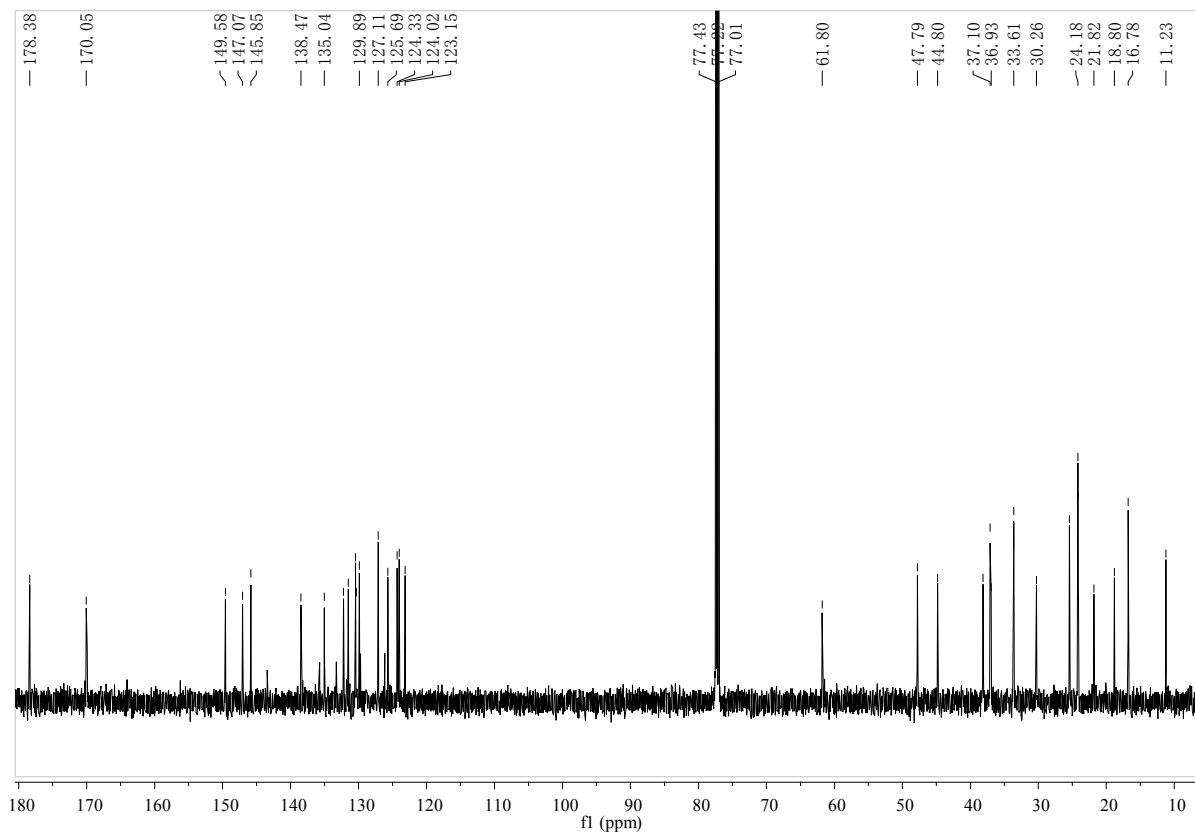

Figure S54.  $^{13}\text{C}$ -NMR spectrum of the target compound (**4**) in  $\text{CDCl}_3$

JN-3-BR #68 RT: 0.60 AV: 1 SB: 91 1.31-1.76, 0.01-0.34 NL: 7.70E5  
T: - c ESI Q1MS [100.000-1000.000]

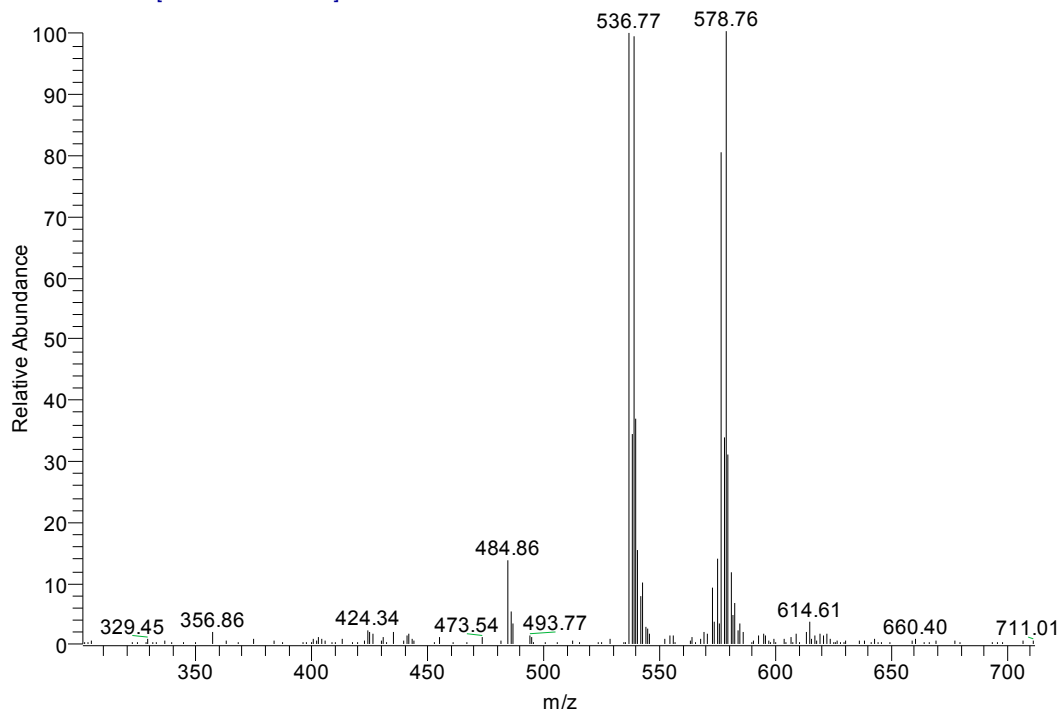

Figure S55. ESI-MS spectrum of the target compound (4l)

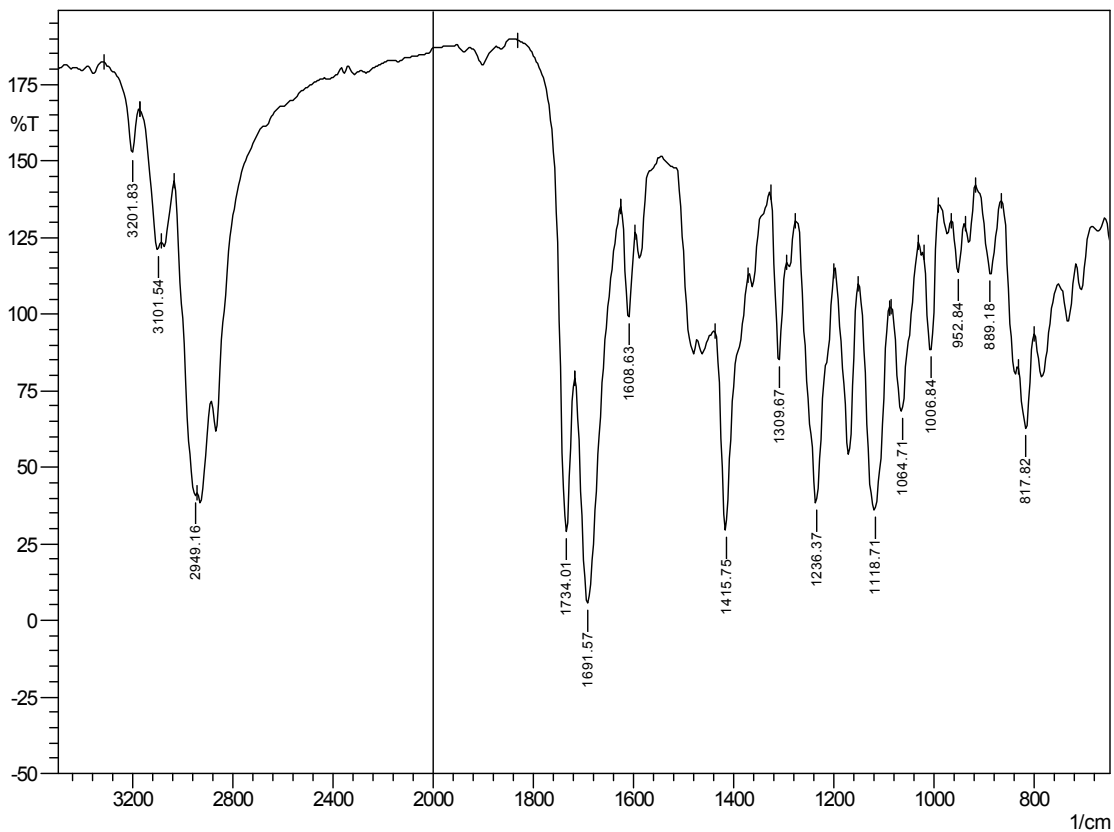

Figure S56. FTIR spectrum of the target compound (4m)

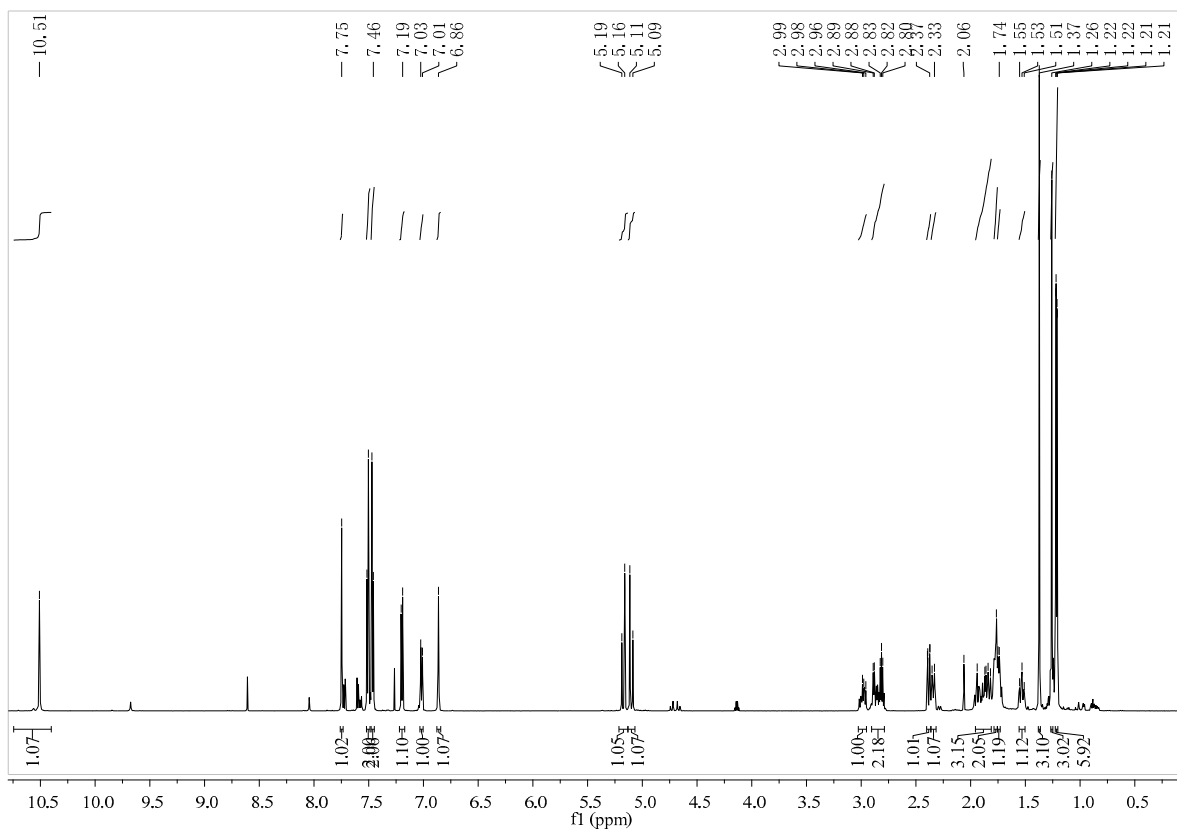

Figure S57.  $^1\text{H-NMR}$  spectrum of the target compound (**4m**) in  $\text{CDCl}_3$

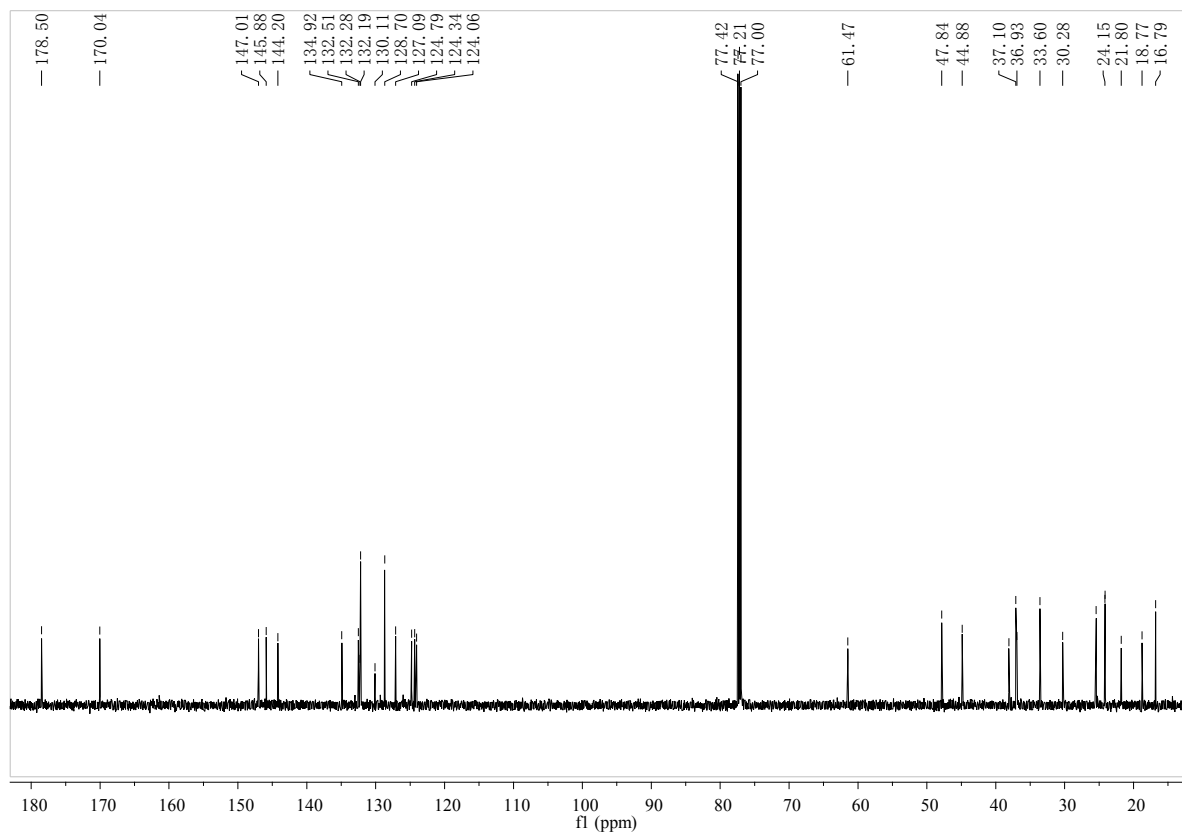

Figure S58.  $^{13}\text{C-NMR}$  spectrum of the target compound (**4m**) in  $\text{CDCl}_3$

JN-DX#97 RT: 0.86 AV: 1 NL: 2.20E6  
T: - c ESI Q1MS [100.000-1000.000]

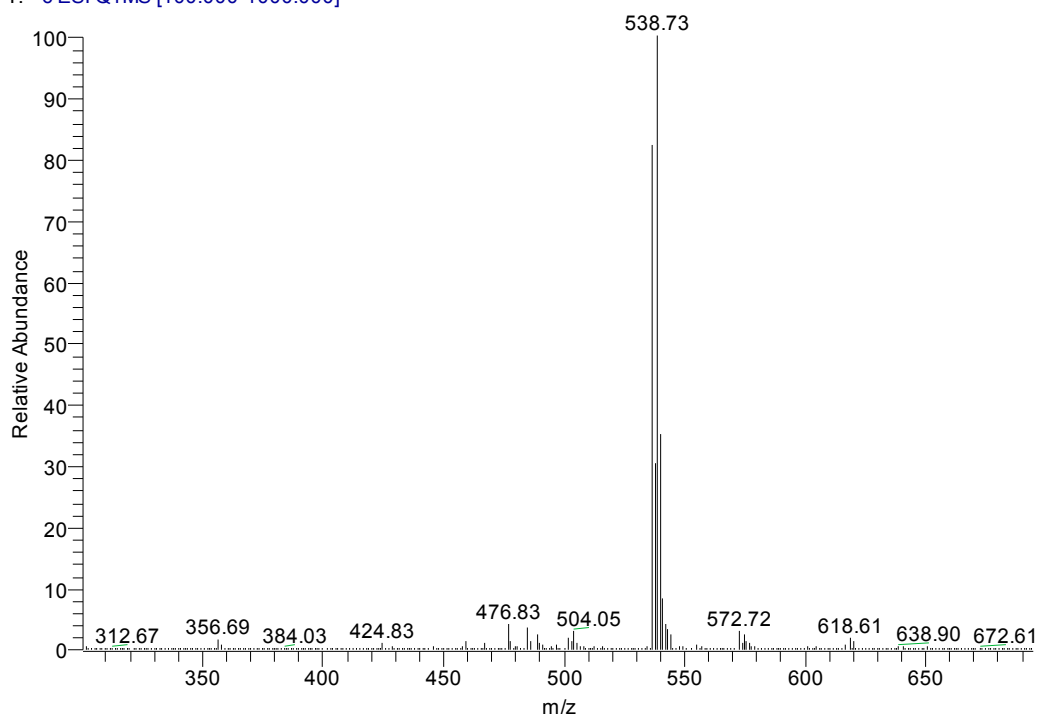

Figure S59. ESI-MS spectrum of the target compound (4m)

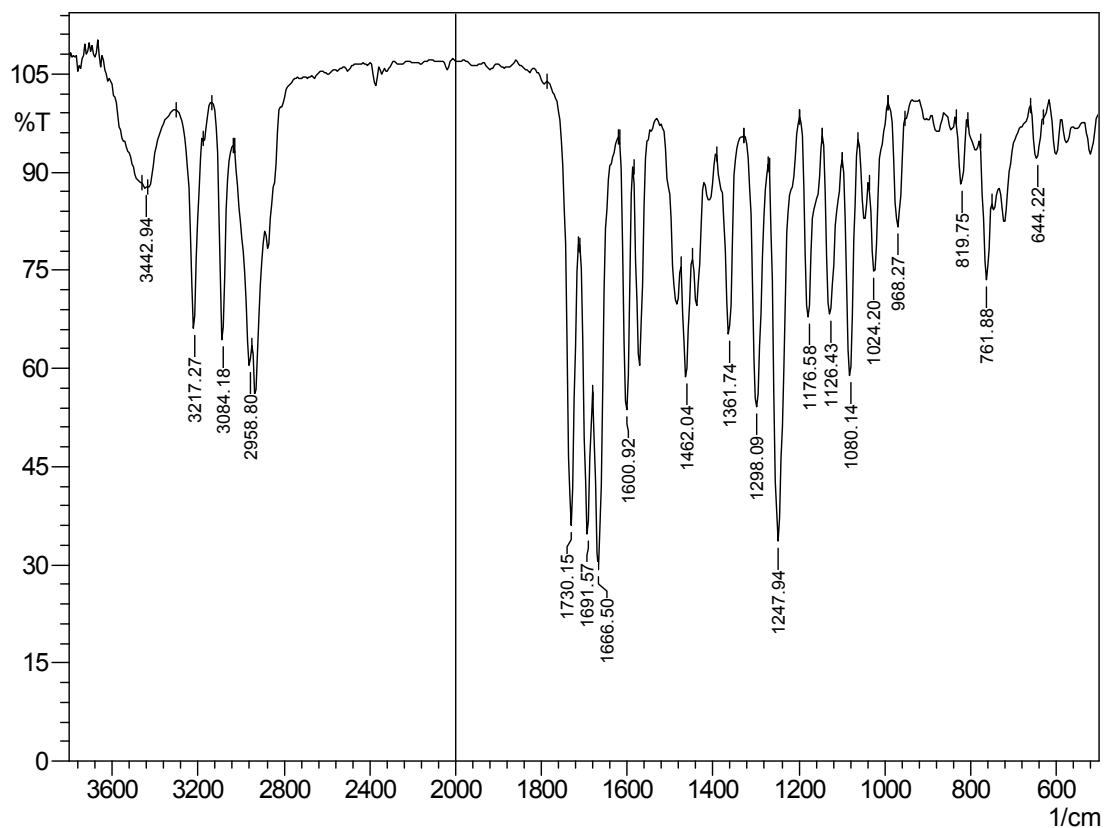

Figure S60. FTIR spectrum of the target compound (4n)

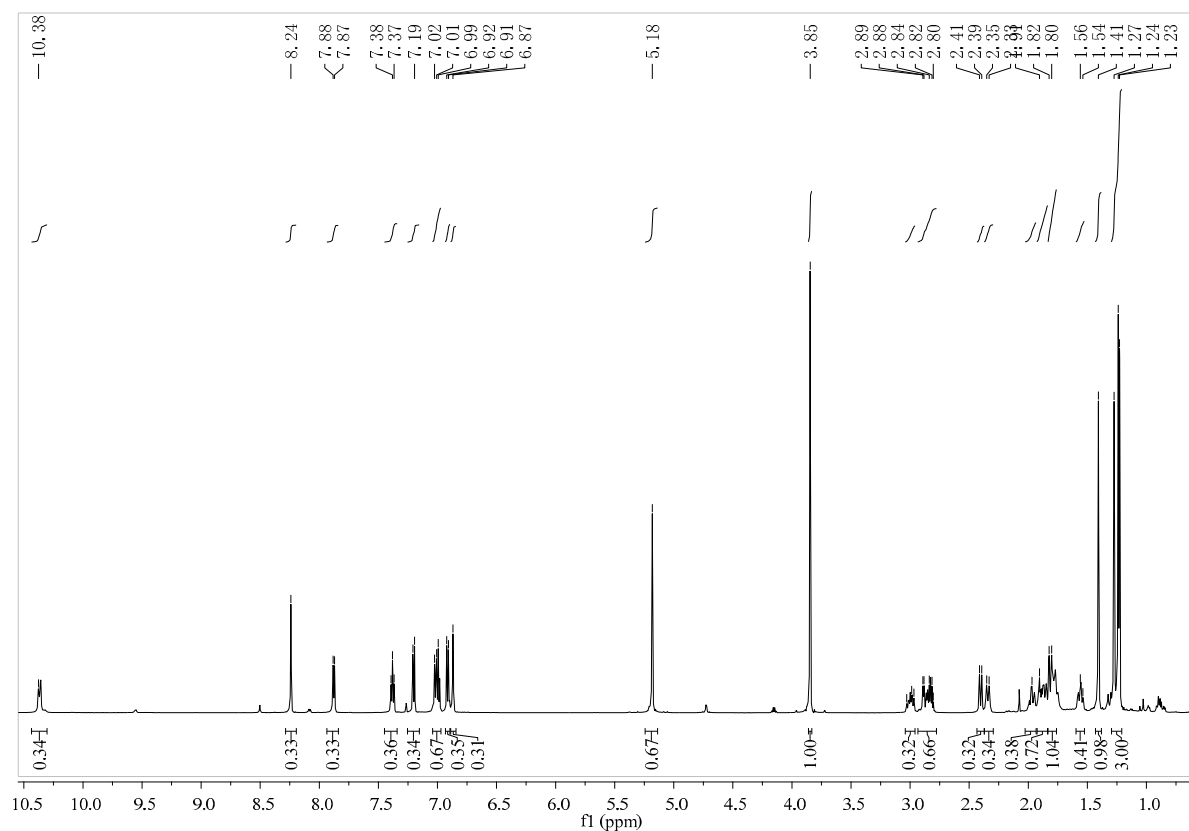

Figure S61. <sup>1</sup>H-NMR spectrum of the target compound (**4n**) in CDCl<sub>3</sub>

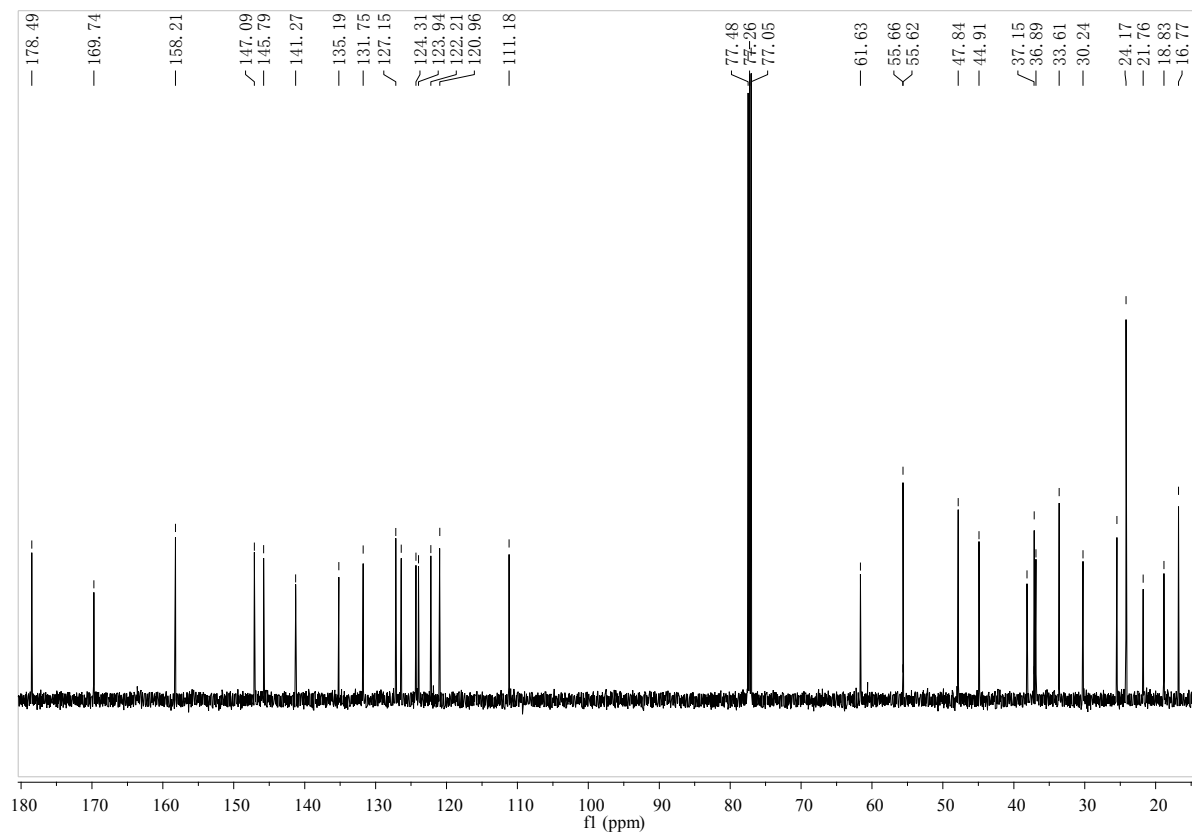

Figure S62. <sup>13</sup>C-NMR spectrum of the target compound (**4n**) in CDCl<sub>3</sub>

JN-2-JYJ #141 RT: 1.25 AV: 1 NL: 5.46E6  
T: - c ESI Q1MS [100.000-1000.000]

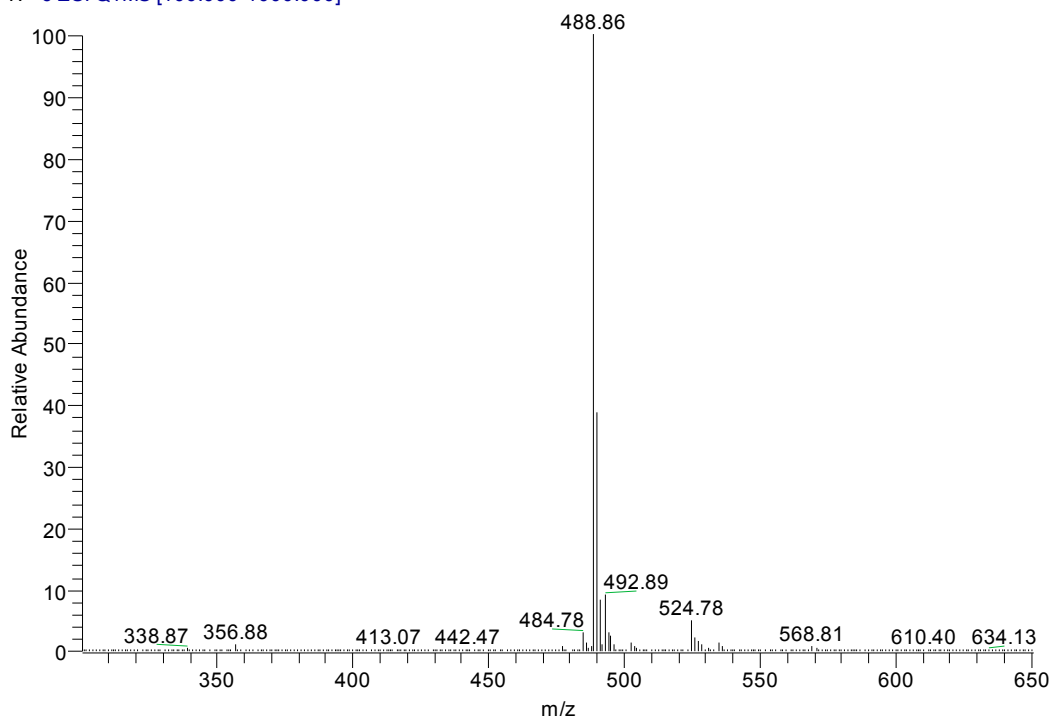

Figure S63. ESI-MS spectrum of the target compound (4n)

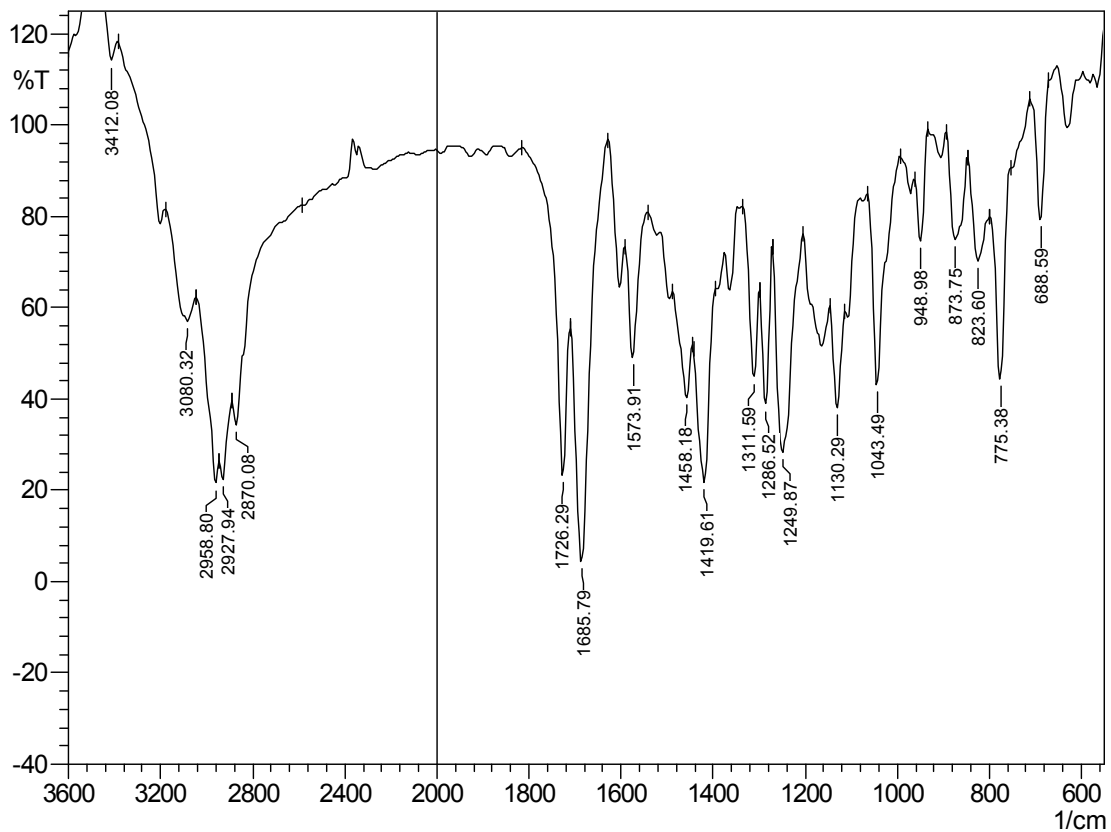

Figure S64. FTIR spectrum of the target compound (4o)



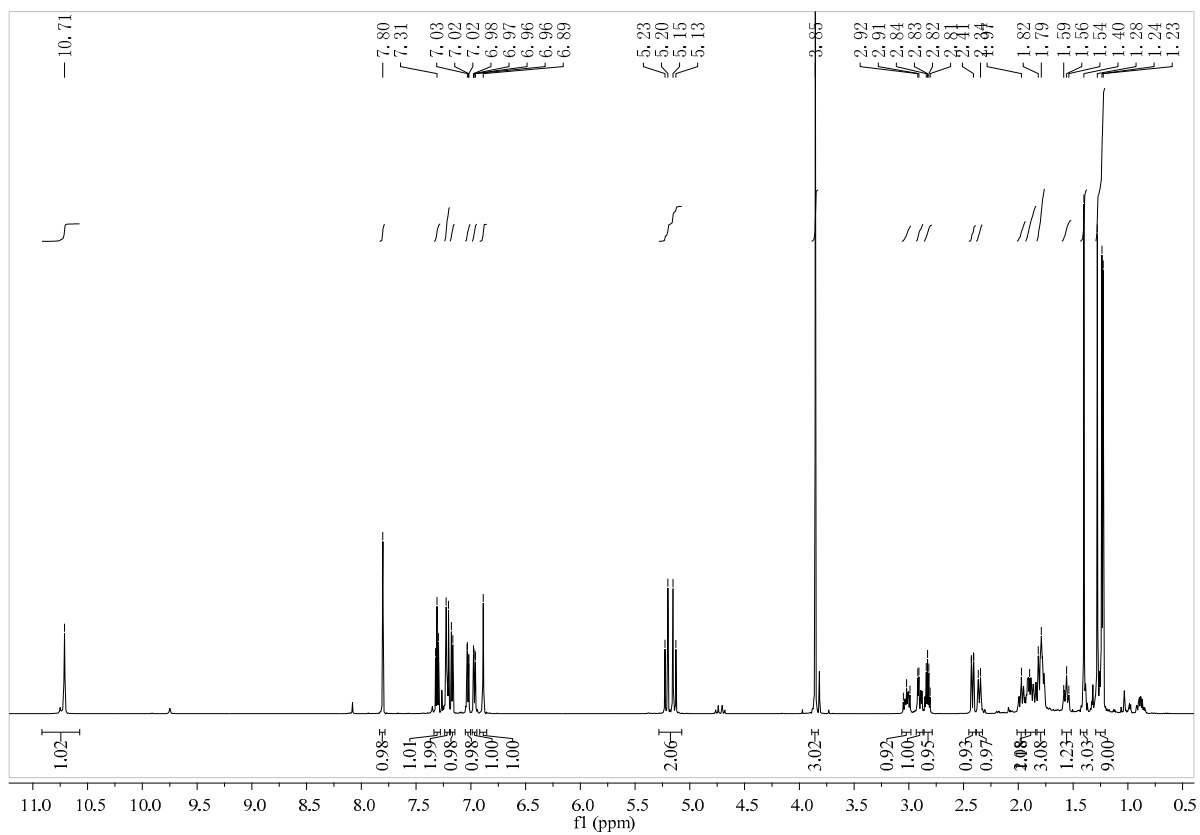

Figure S65.  $^1\text{H-NMR}$  spectrum of the target compound (**4o**) in  $\text{CDCl}_3$

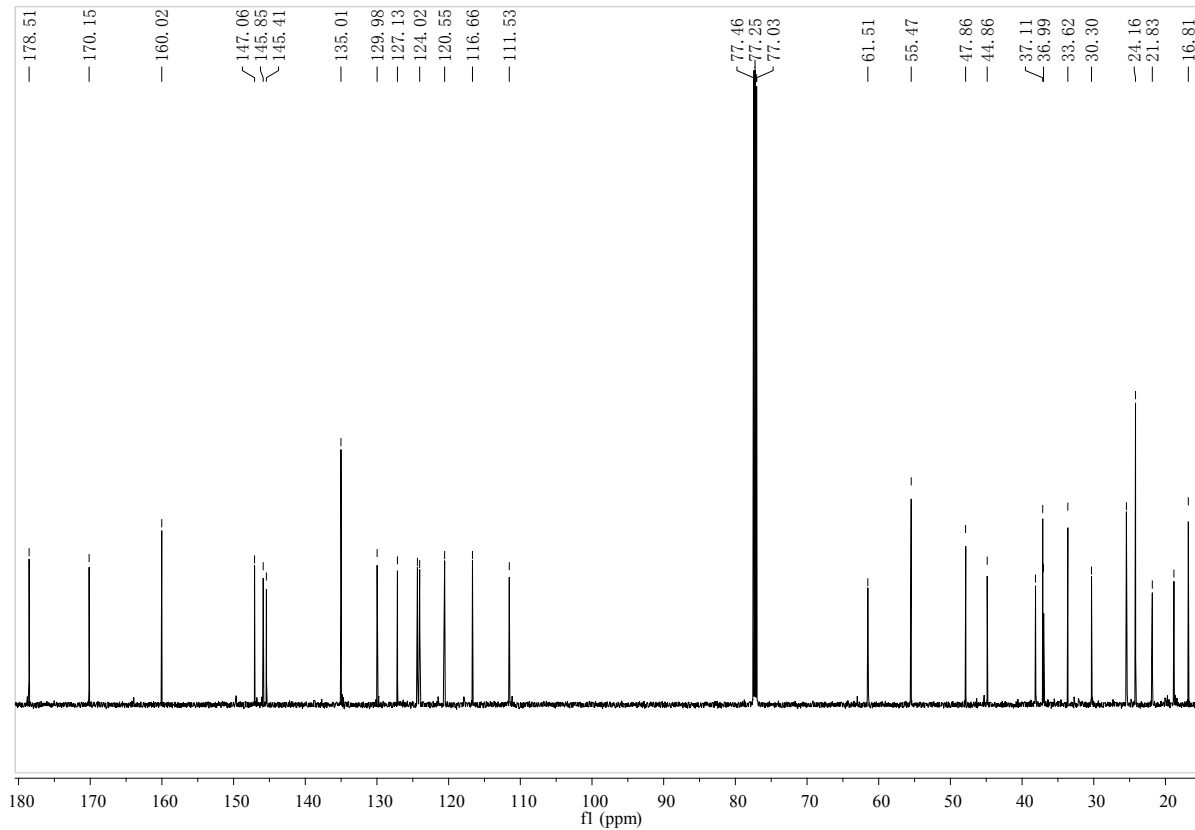

Figure S66.  $^{13}\text{C-NMR}$  spectrum of the target compound (**4o**) in  $\text{CDCl}_3$

JN-3-JYJ #70 RT: 0.62 AV: 1 SB: 37 0.01-0.33 NL: 1.32E6  
T: - c ESI Q1MS [100.000-1000.000]

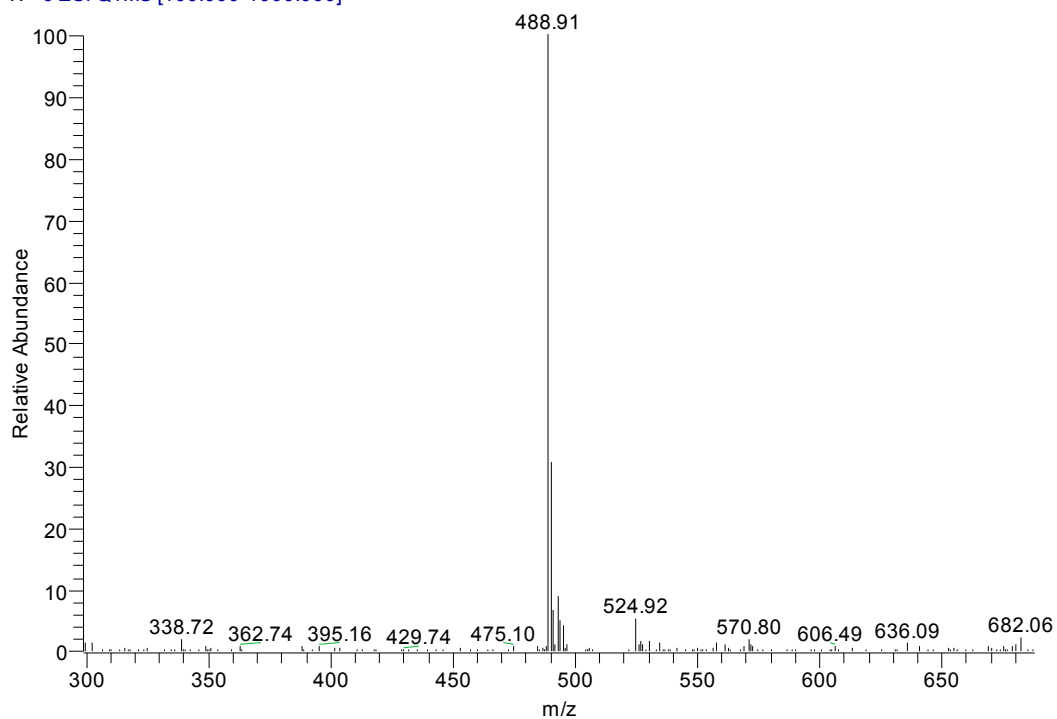

Figure S67. ESI-MS spectrum of the target compound (4o)

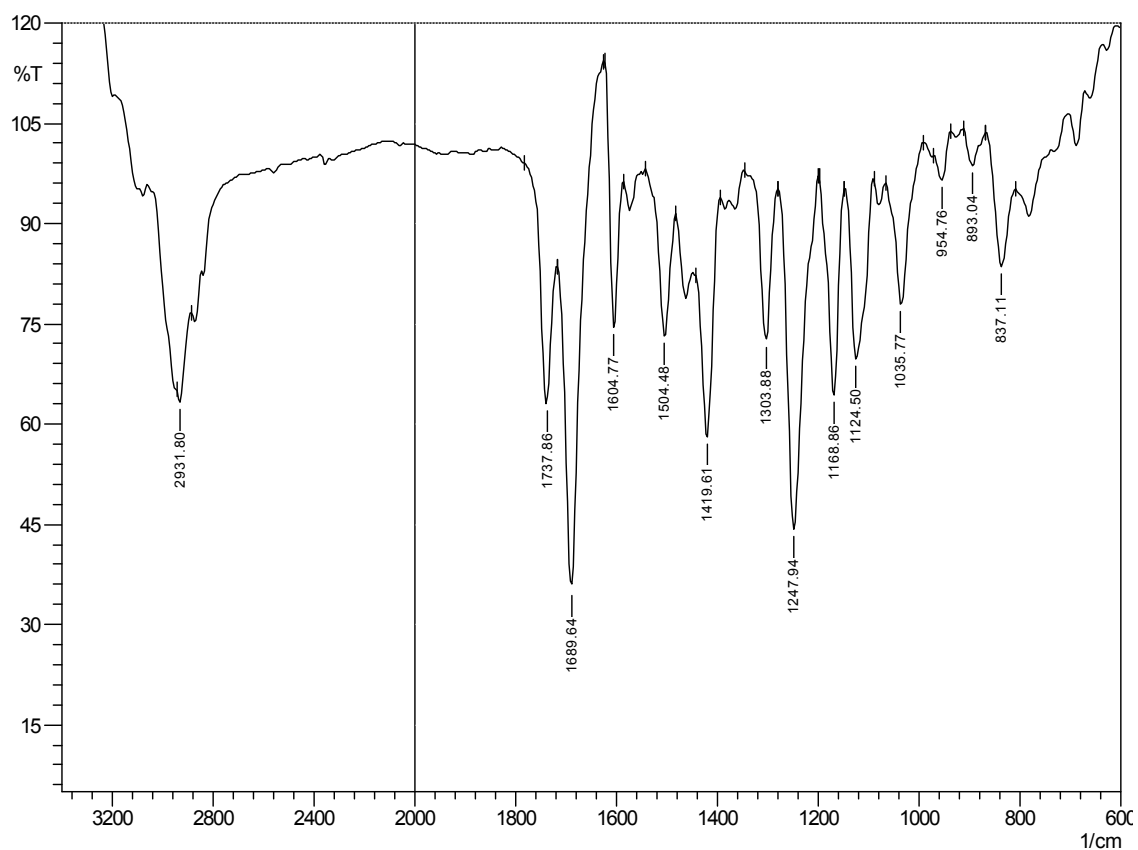

Figure S68. FTIR spectrum of the target compound (4p)

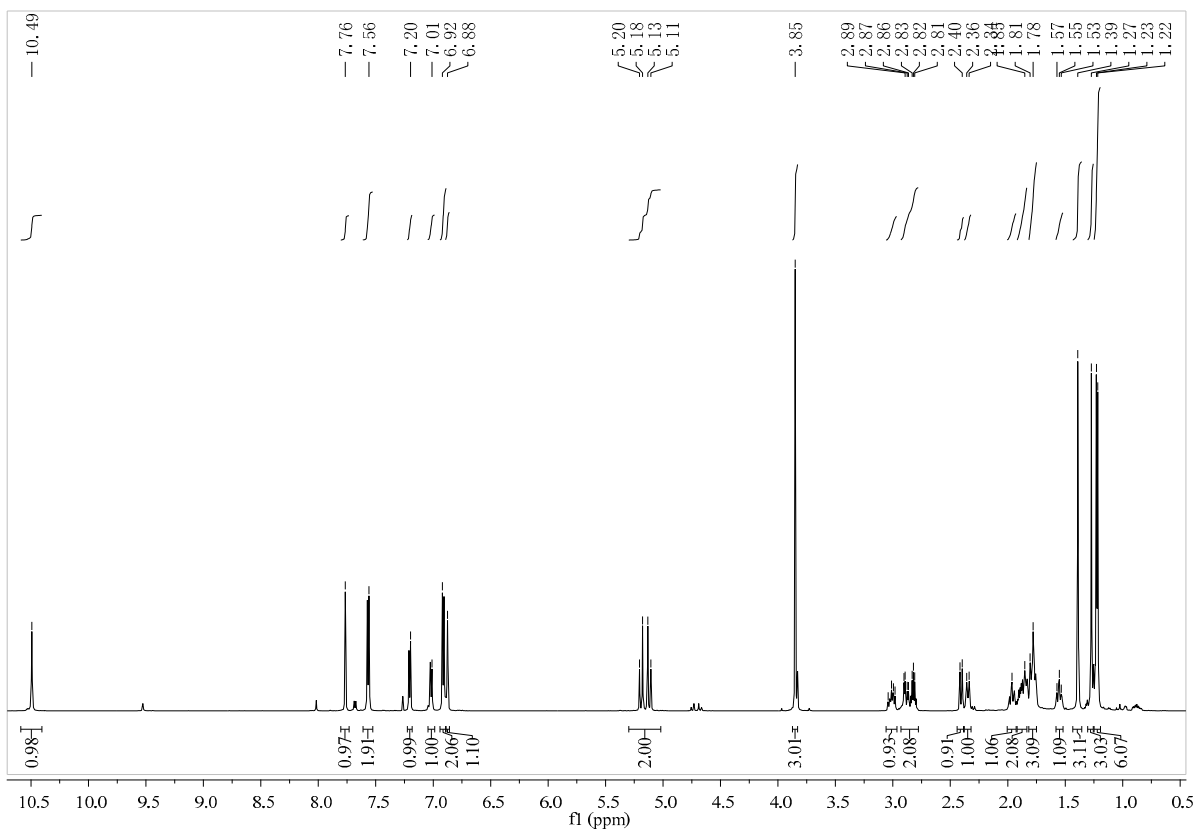

Figure S69.  $^1\text{H-NMR}$  spectrum of the target compound (**4p**) in  $\text{CDCl}_3$

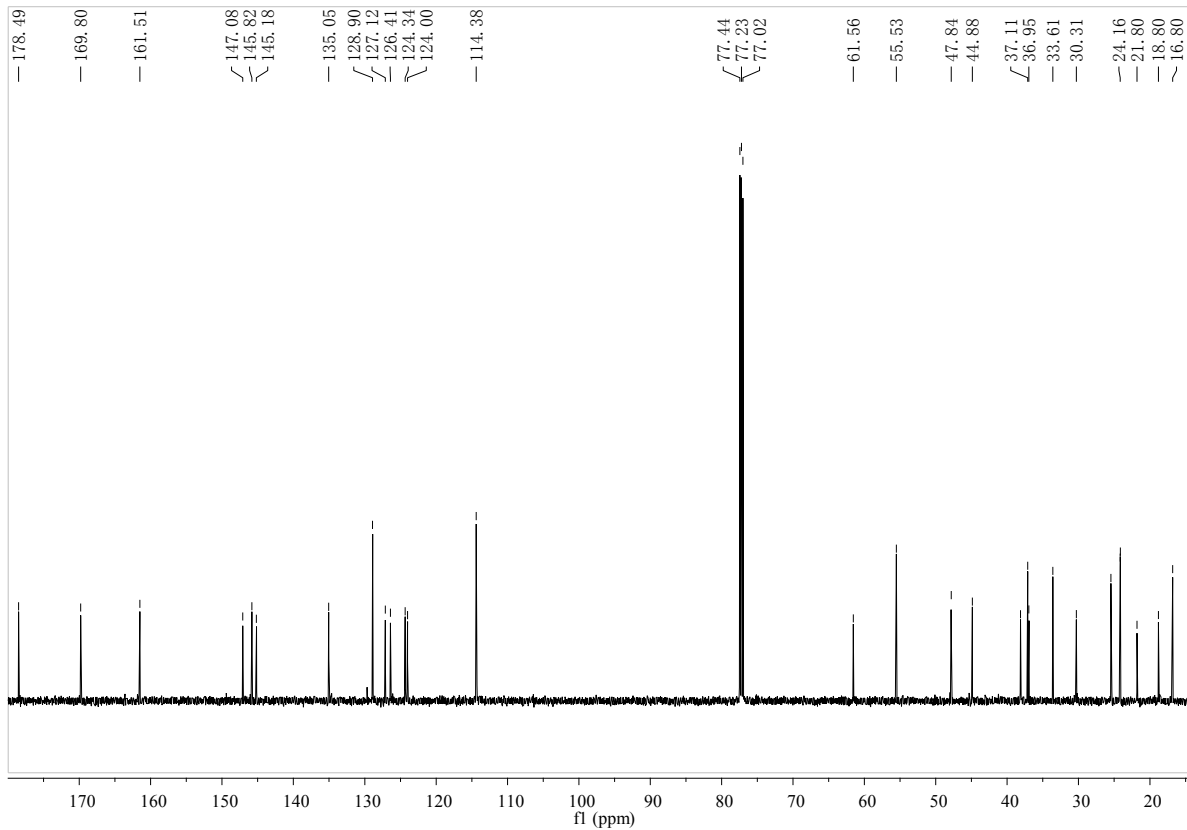

Figure S70.  $^{13}\text{C-NMR}$  spectrum of the target compound (**4p**) in  $\text{CDCl}_3$

JN-DJYJ #53 RT: 0.46 AV: 1 NL: 4.44E6  
T: - c ESI Q1MS [100.000-1000.000]

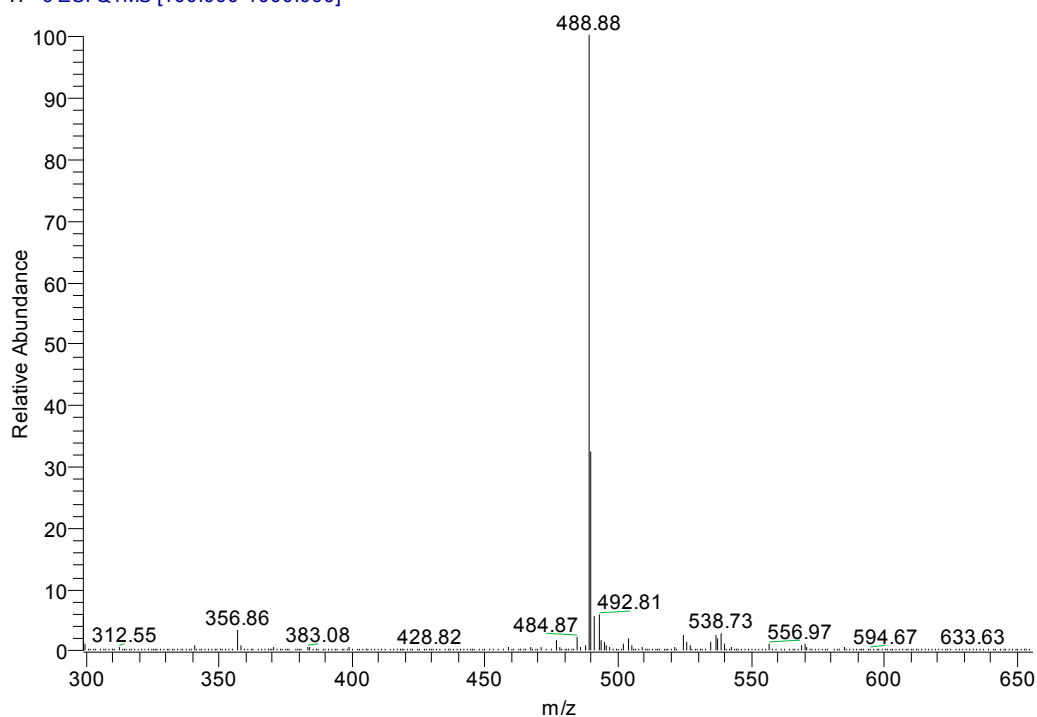

Figure S71. ESI-MS spectrum of the target compound (4p)

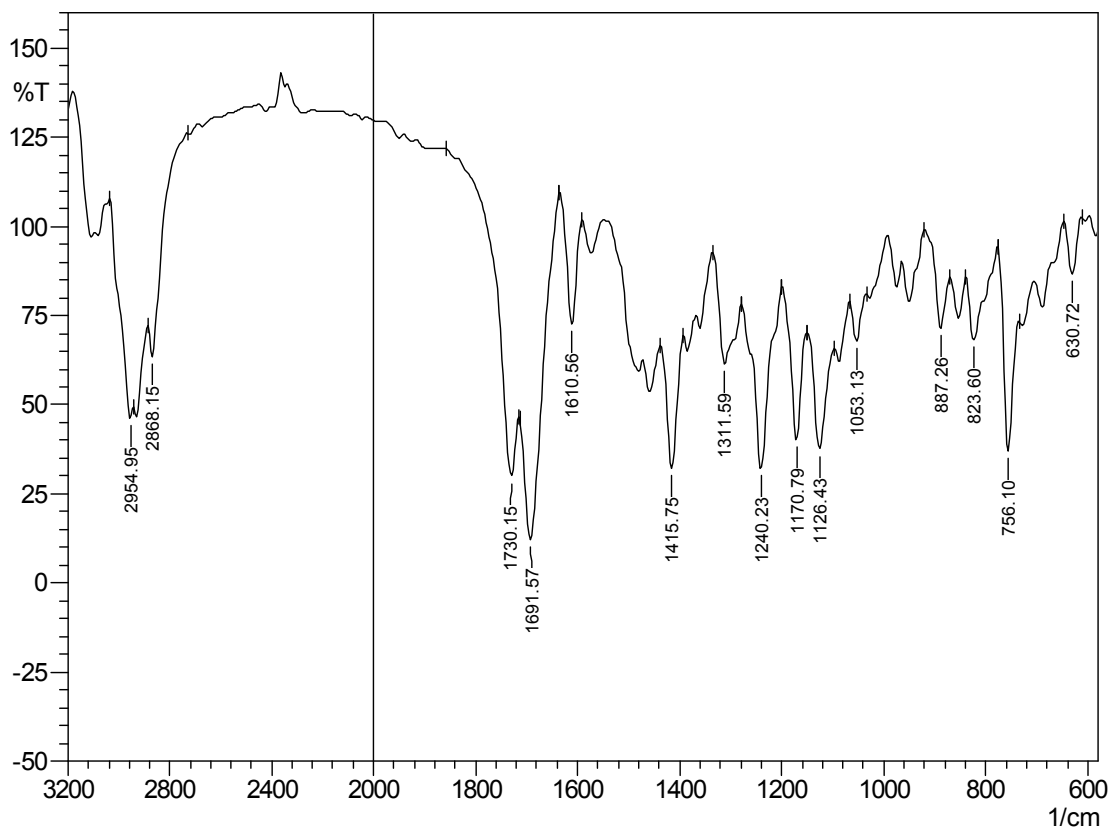

Figure S72. FTIR spectrum of the target compound (4q)

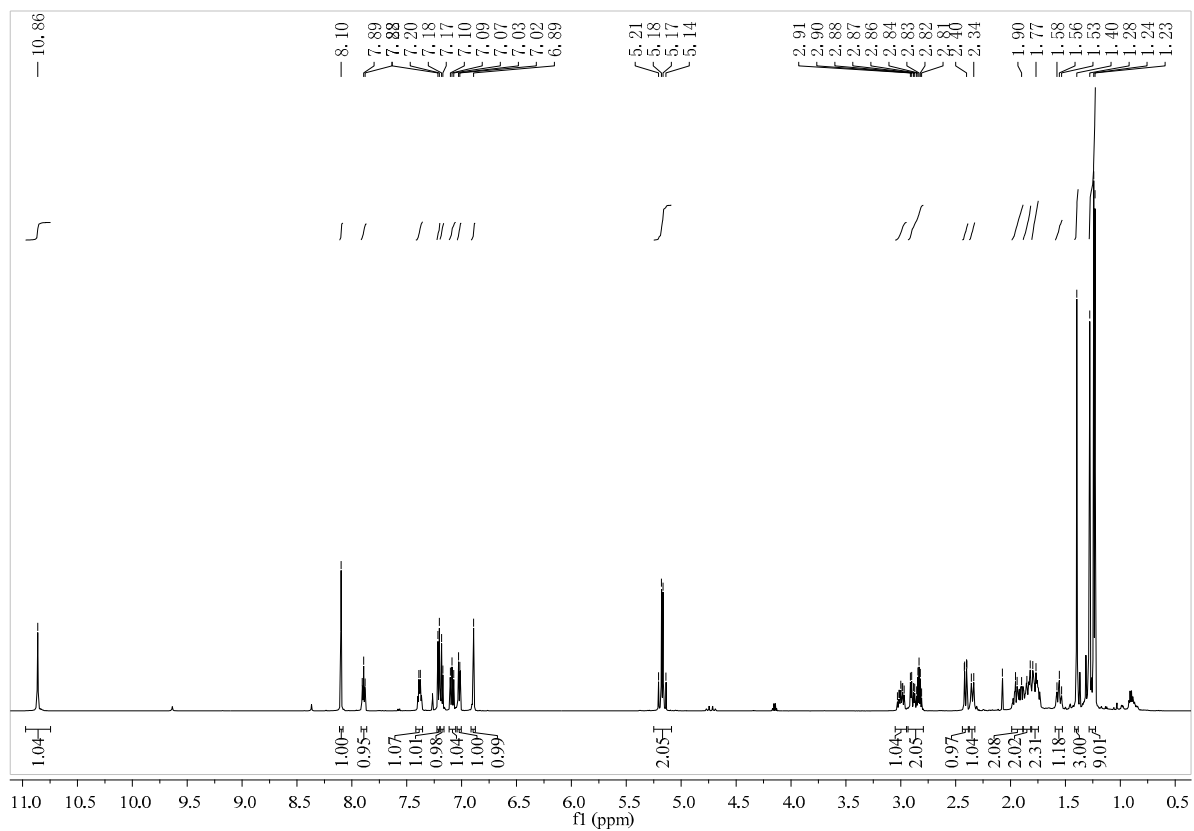

Figure S73.  $^1\text{H-NMR}$  spectrum of the target compound (**4q**) in  $\text{CDCl}_3$

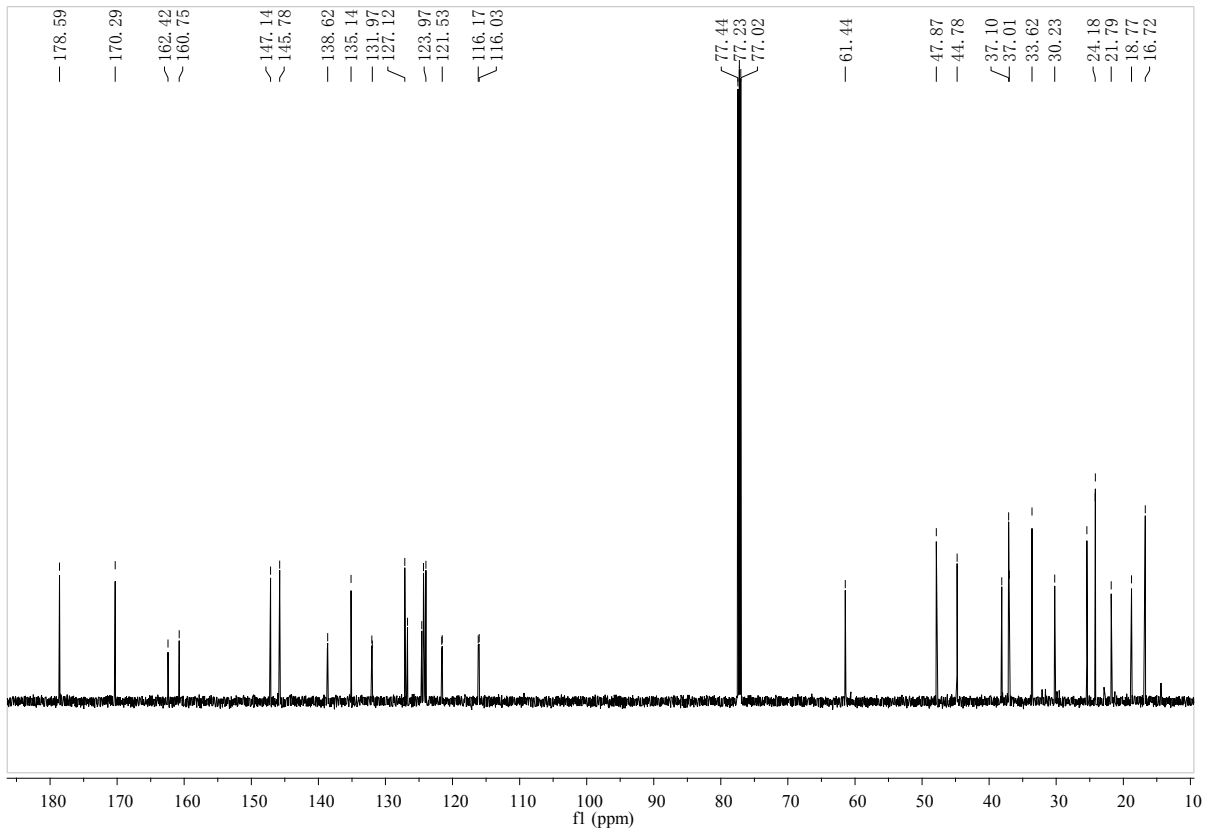

Figure S74.  $^{13}\text{C-NMR}$  spectrum of the target compound (**4q**) in  $\text{CDCl}_3$

JN-2-F #71 RT: 0.63 AV: 1 SB: 42 0.01-0.37 NL: 4.66E6  
T: - c ESI Q1MS [100.000-1000.000]

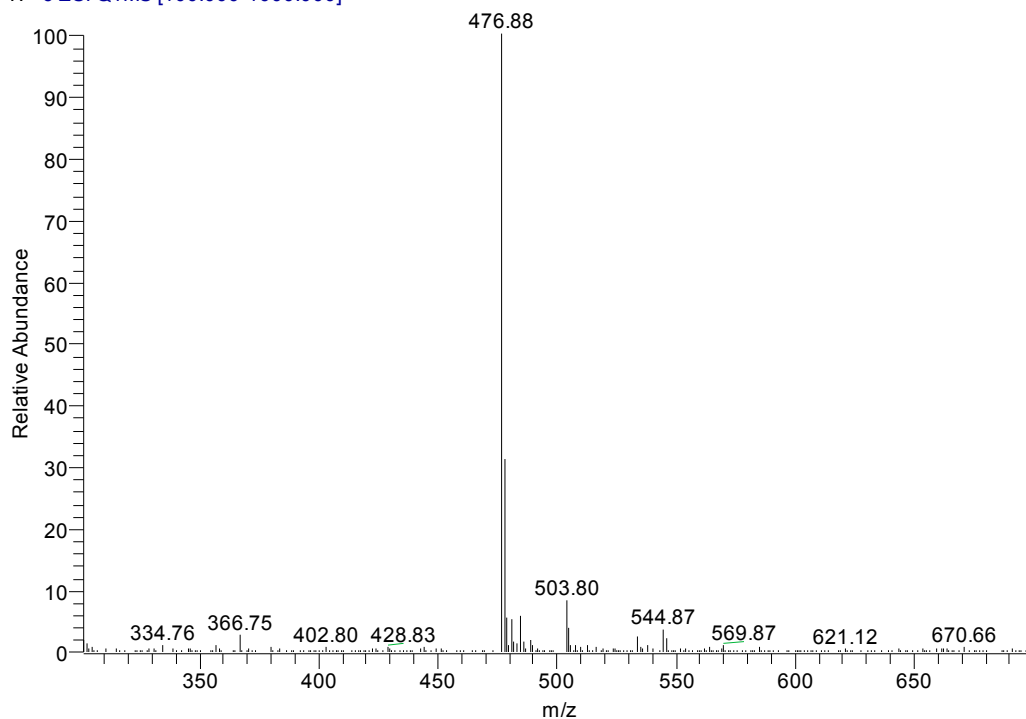

Figure S75. ESI-MS spectrum of the target compound (4q)

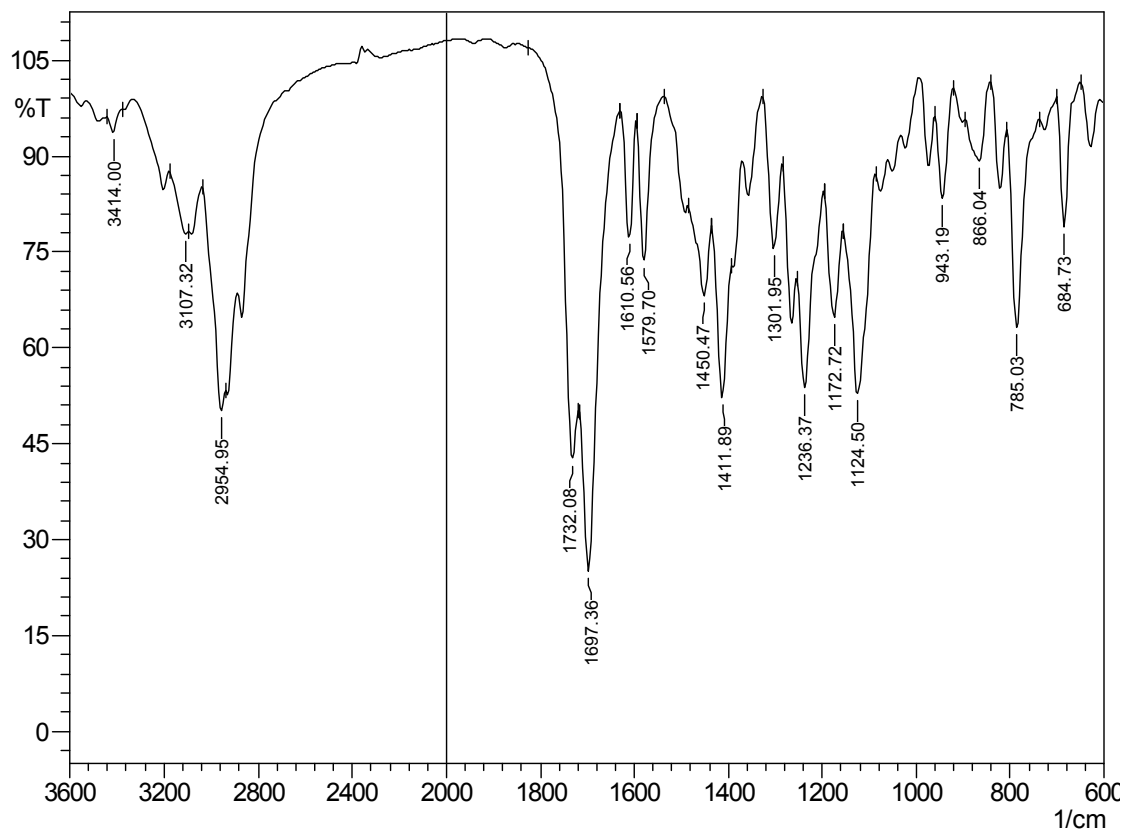

Figure S76. FTIR spectrum of the target compound (4r)

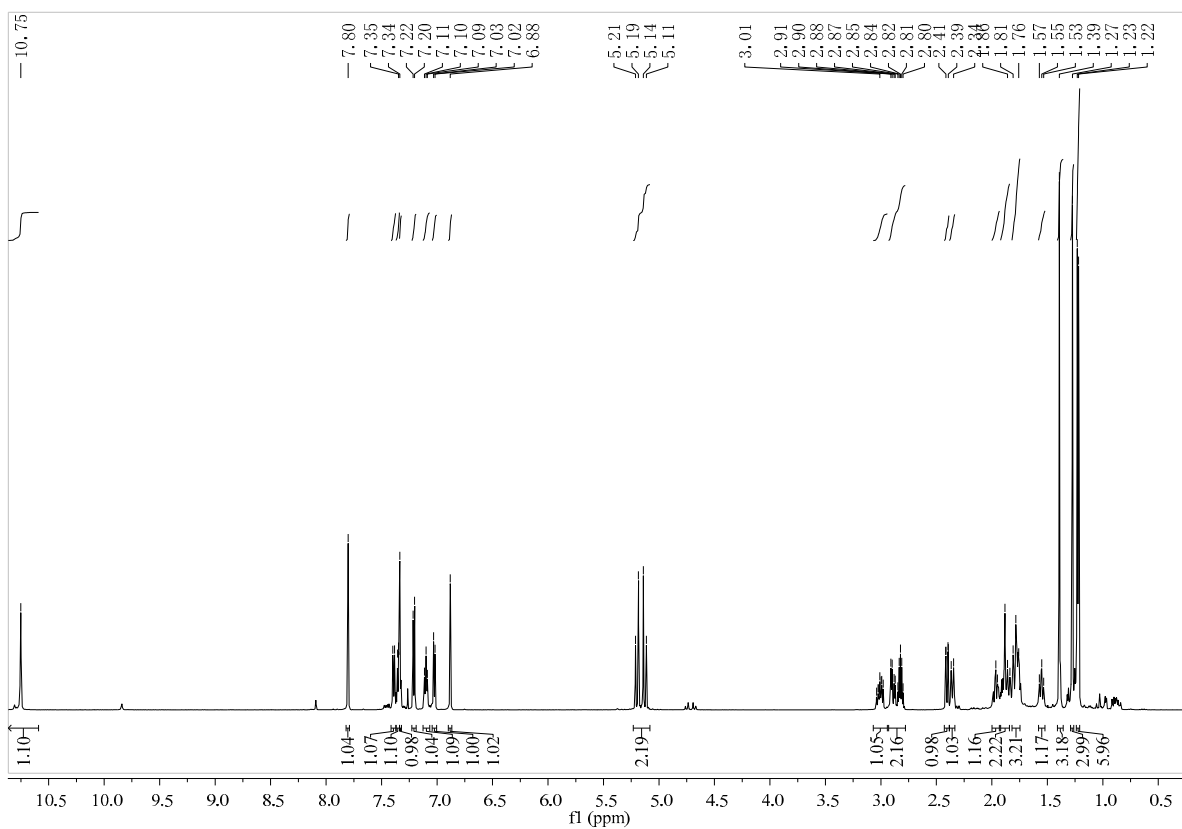

Figure S77.  $^1\text{H-NMR}$  spectrum of the target compound (**4r**) in  $\text{CDCl}_3$

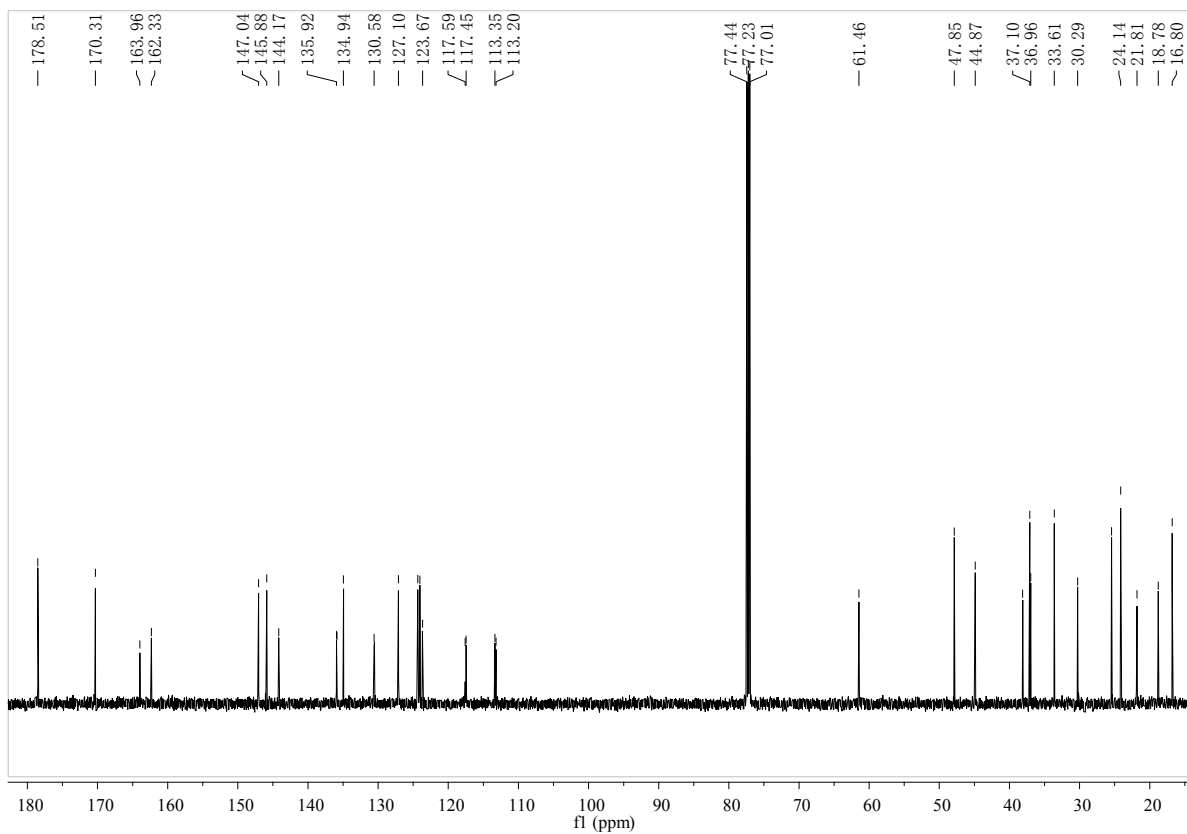

Figure S78.  $^{13}\text{C-NMR}$  spectrum of the target compound (**4r**) in  $\text{CDCl}_3$

JN-3F #75 RT: 0.66 AV: 1 NL: 6.01E6  
T: - c ESI Q1MS [100.000-1000.000]

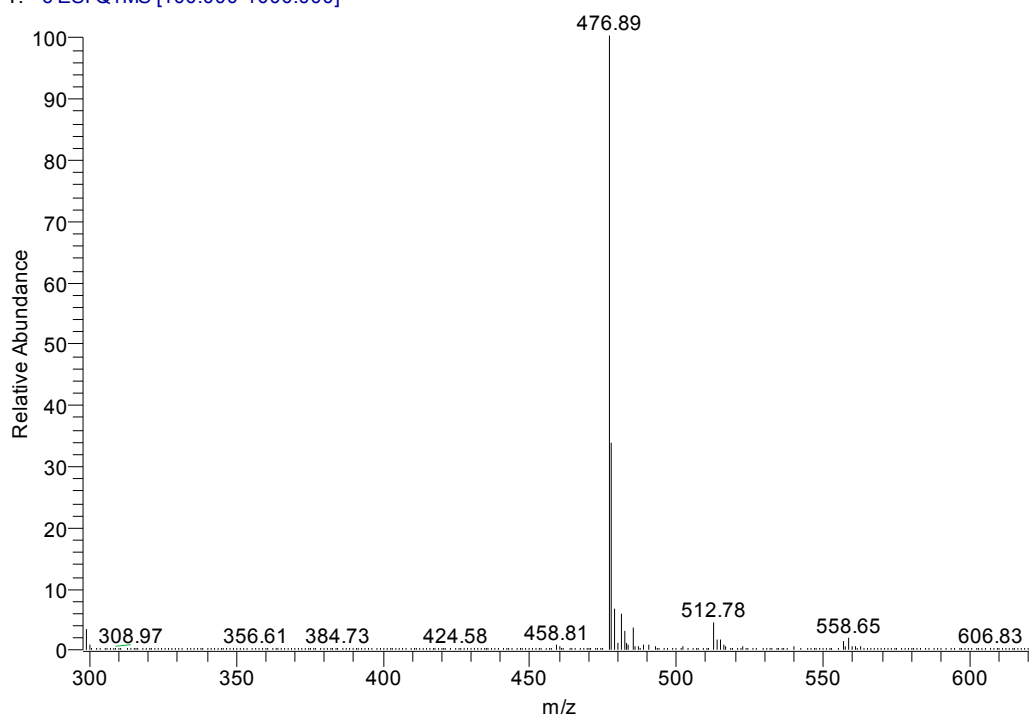

Figure S79. ESI-MS spectrum of the target compound (4r)

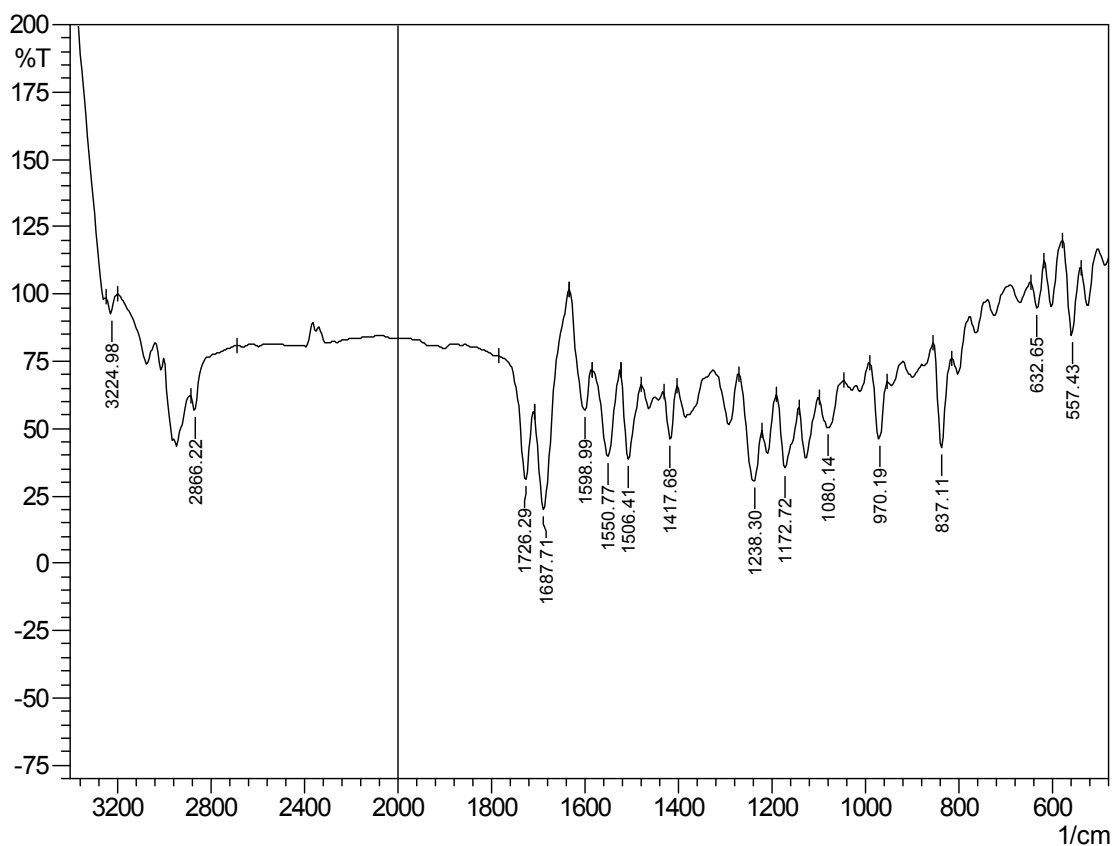

Figure S80. FTIR spectrum of the target compound (4s)



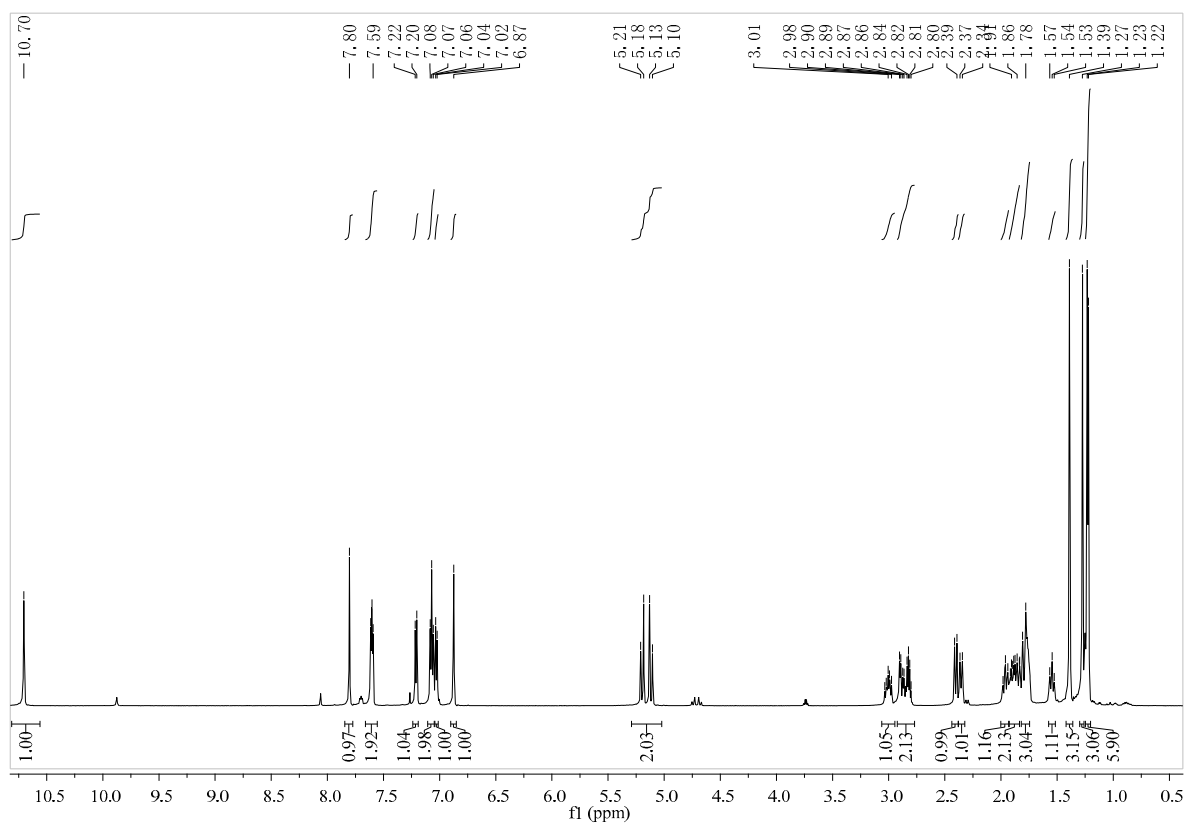

Figure S81.  $^1\text{H-NMR}$  spectrum of the target compound (**4s**) in  $\text{CDCl}_3$

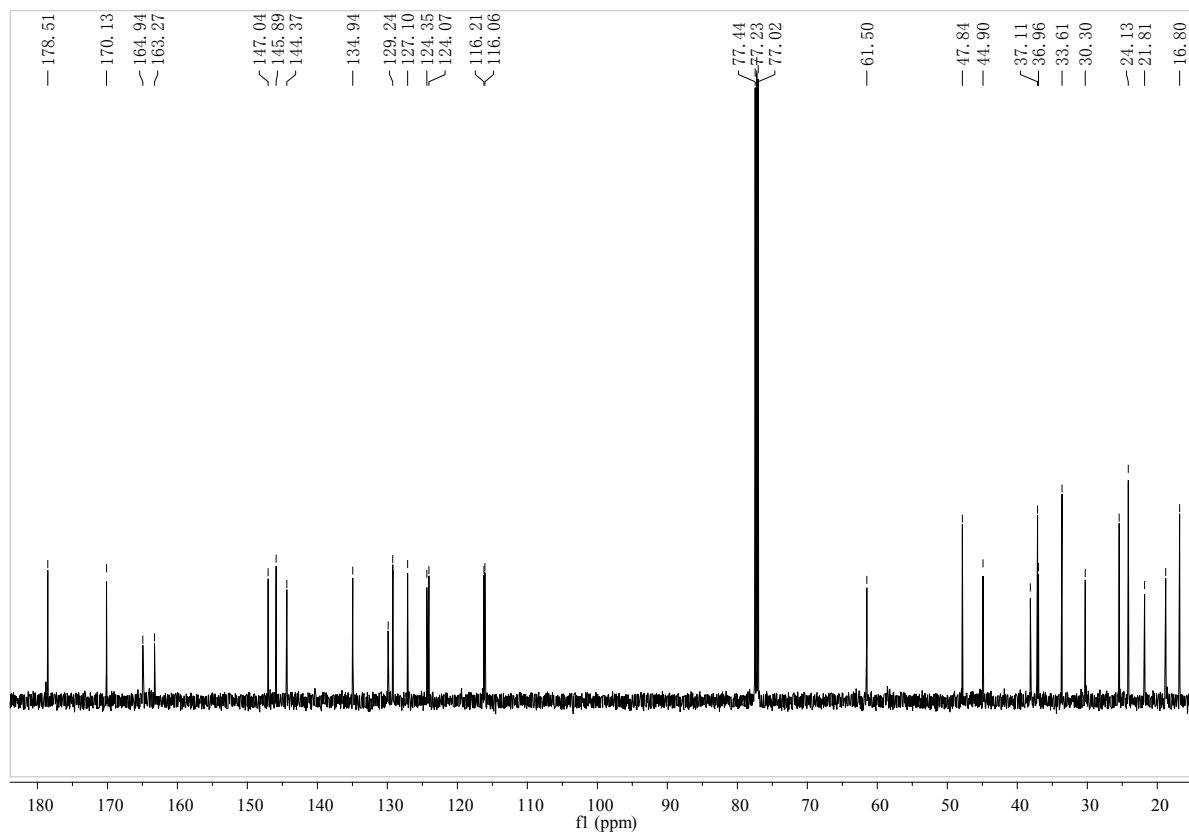

Figure S82.  $^{13}\text{C-NMR}$  spectrum of the target compound (**4s**) in  $\text{CDCl}_3$

JN-4-F #92 RT: 0.82 AV: 1 NL: 9.75E5  
T: - c ESI Q1MS [100.000-1000.000]

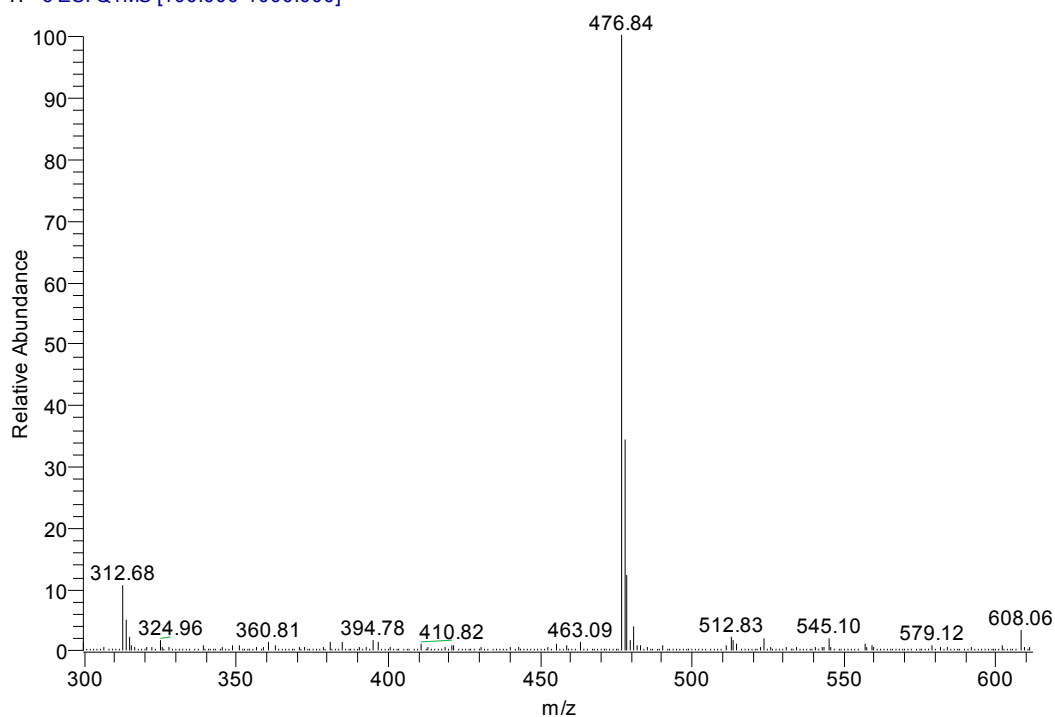

Figure S83. ESI-MS spectrum of the target compound (4s)

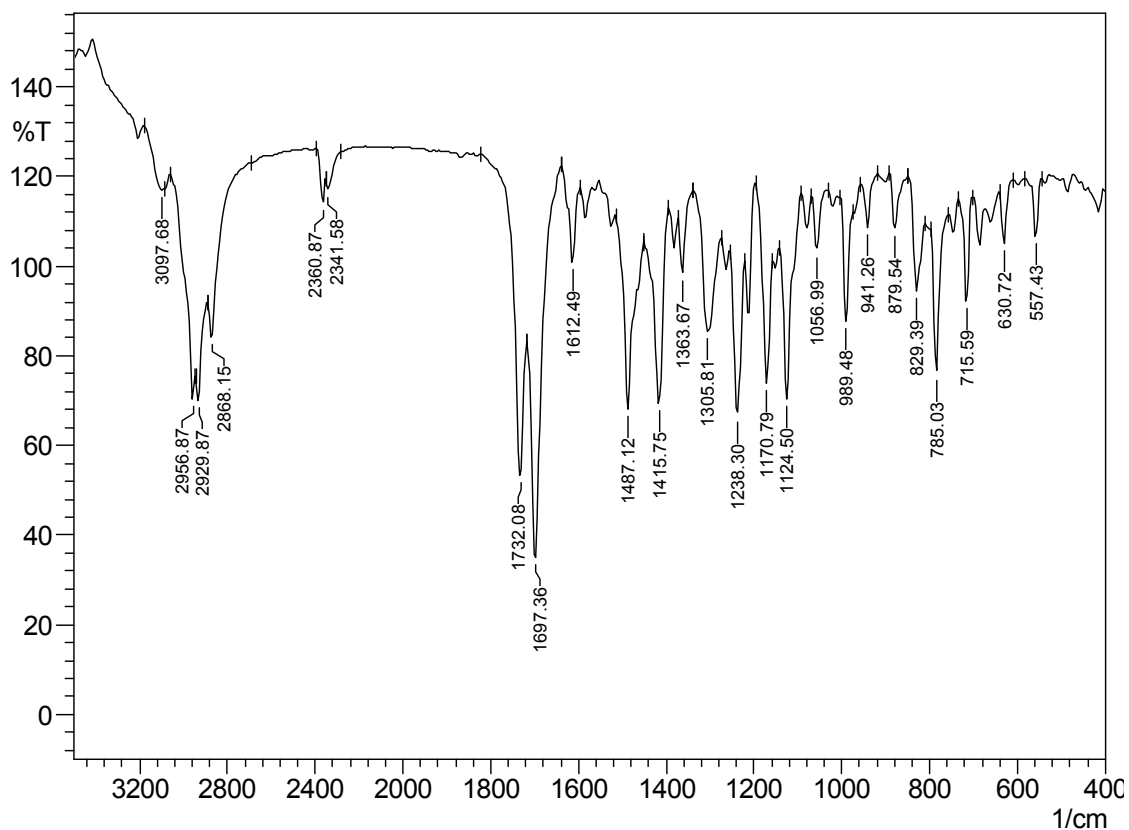

Figure S84. FTIR spectrum of the target compound (4t)

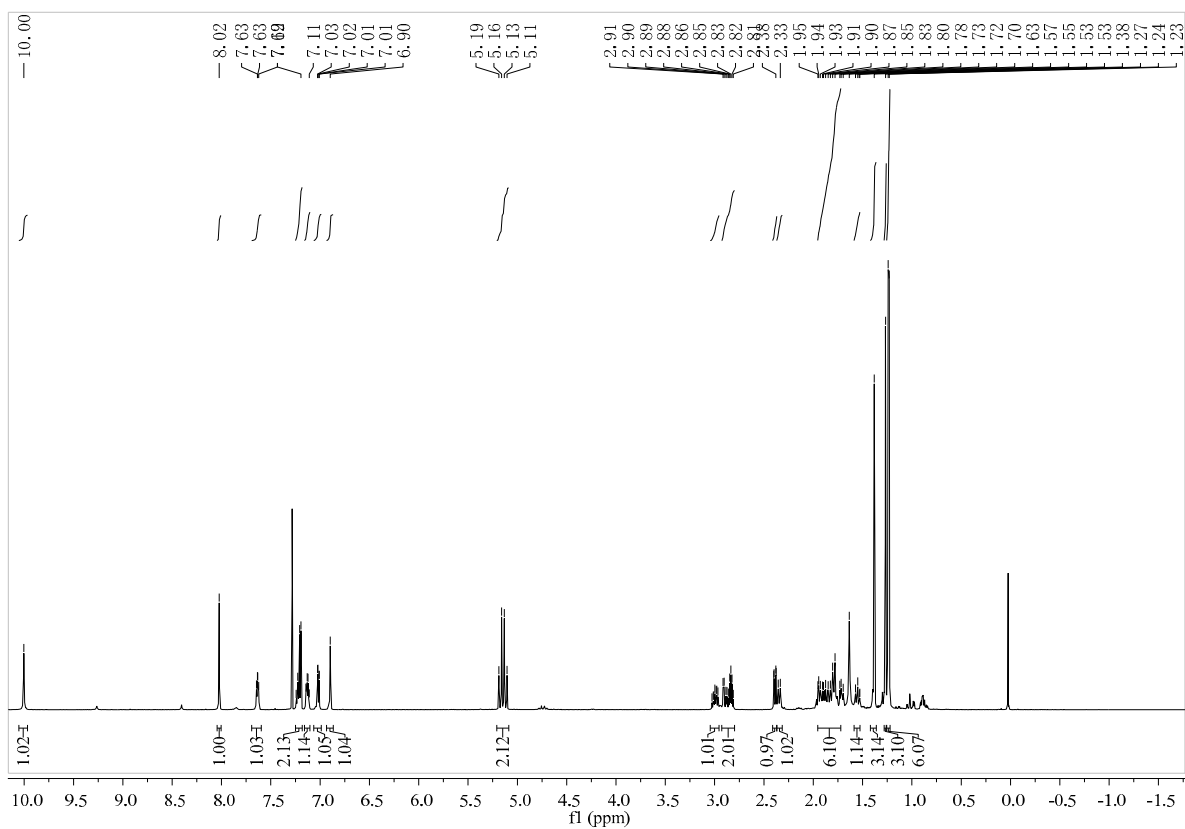

Figure S85.  $^1\text{H-NMR}$  spectrum of the target compound (**4t**) in  $\text{CDCl}_3$

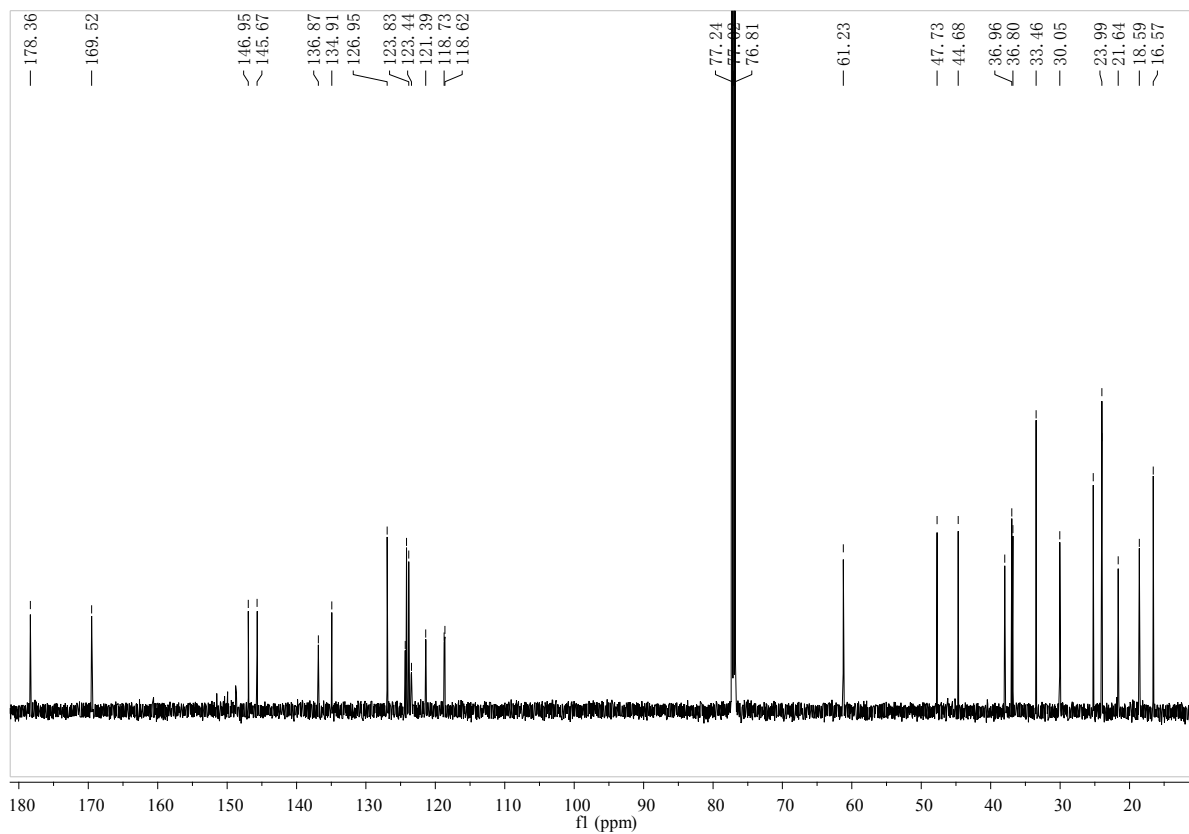

Figure S86.  $^{13}\text{C-NMR}$  spectrum of the target compound (**4t**) in  $\text{CDCl}_3$

# <Spectrum>

Line#:1 R.Time:0.417(Scan#:26)  
MassPeaks:14  
RawMode:Single 0.417(26) BasePeak:495.1(543574)  
BG Mode:None Segment 1 - Event 1

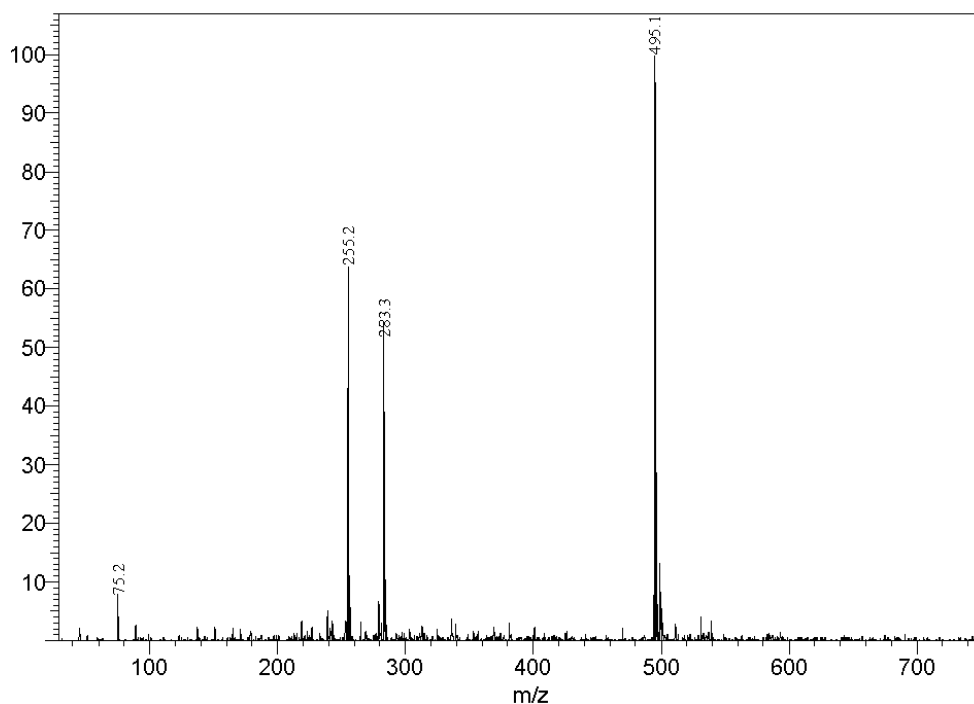

Figure S87. ESI-MS spectrum of the target compound (4t)

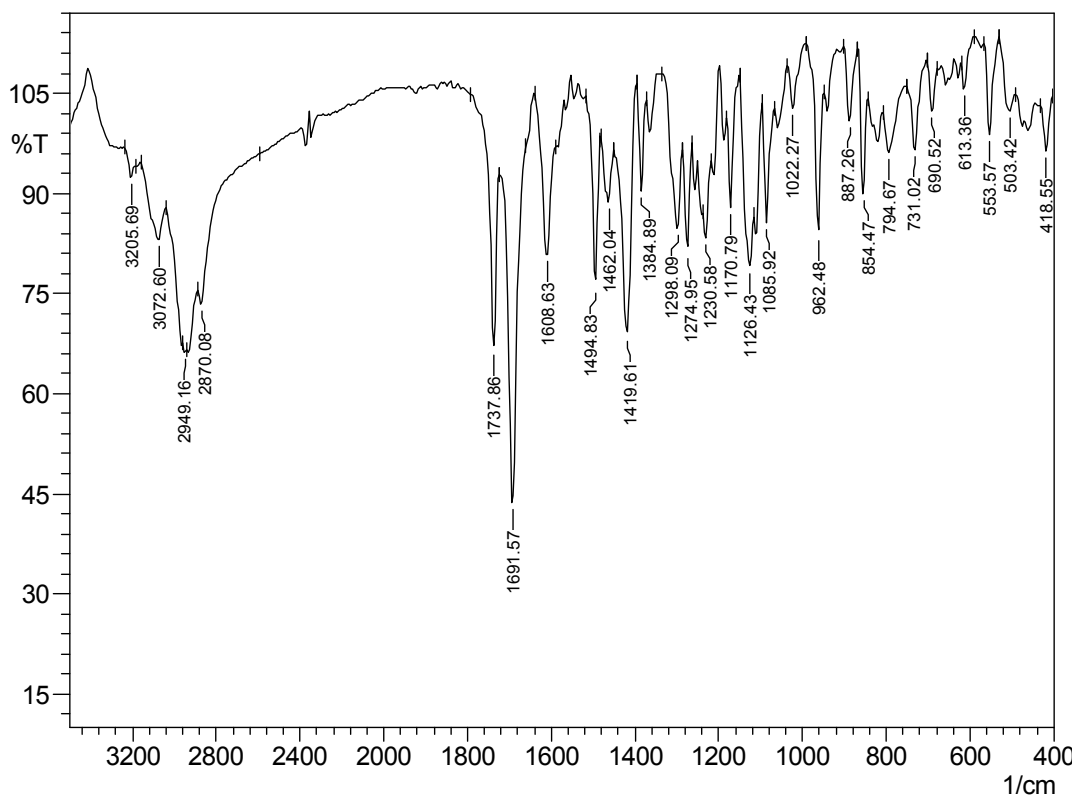

Figure S88. FTIR spectrum of the target compound (4u)

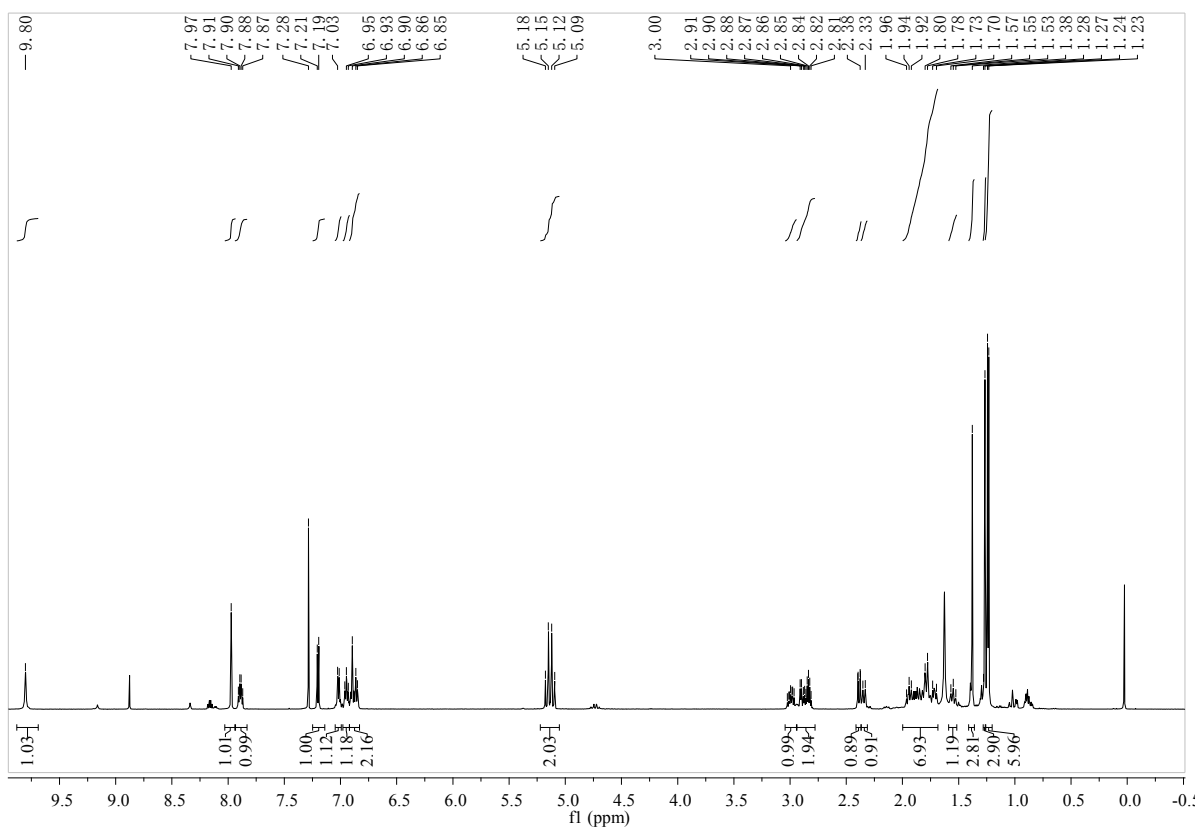

Figure S89.  $^1\text{H-NMR}$  spectrum of the target compound (**4u**) in  $\text{CDCl}_3$

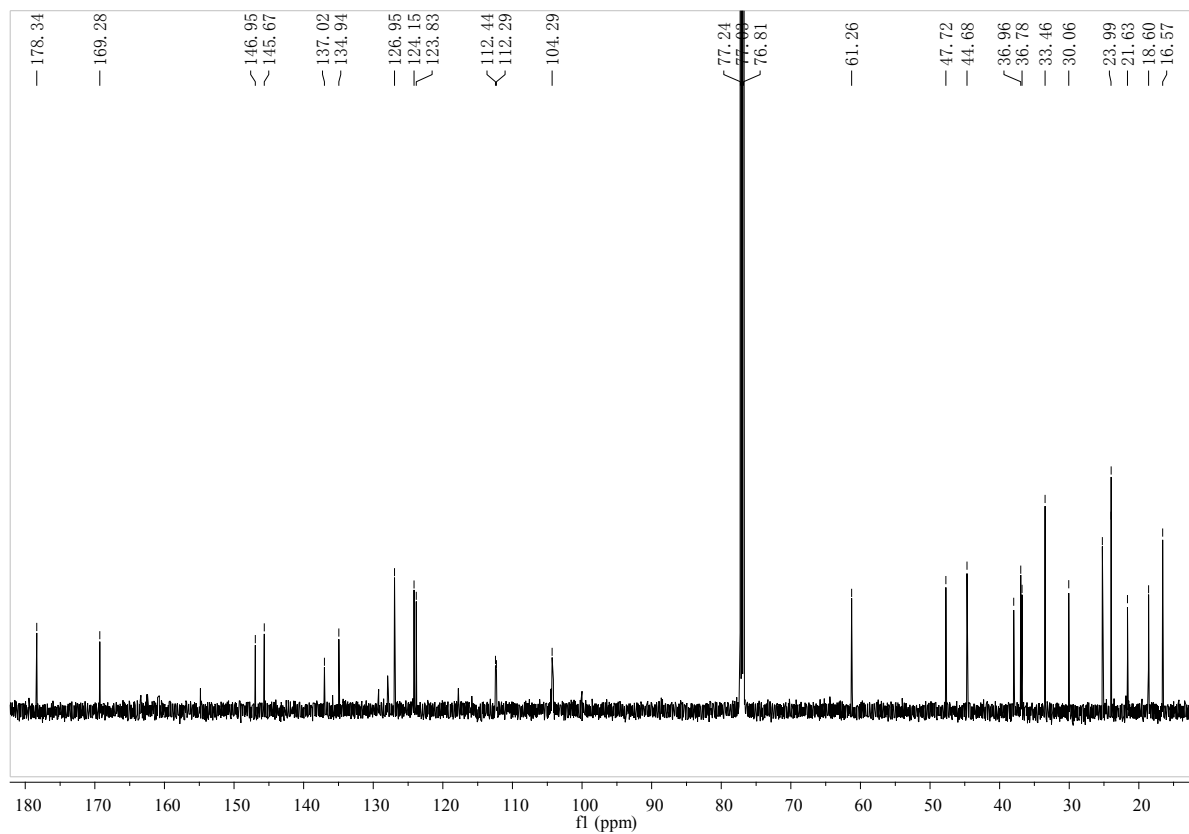

Figure S90.  $^{13}\text{C-NMR}$  spectrum of the target compound (**4u**) in  $\text{CDCl}_3$

# <Spectrum>

Line#:1 R.Time:0.417(Scan#:26)  
MassPeaks:8  
RawMode:Single 0.417(26) BasePeak:255.2(1106908)  
BG Mode:None Segment 1 - Event 1

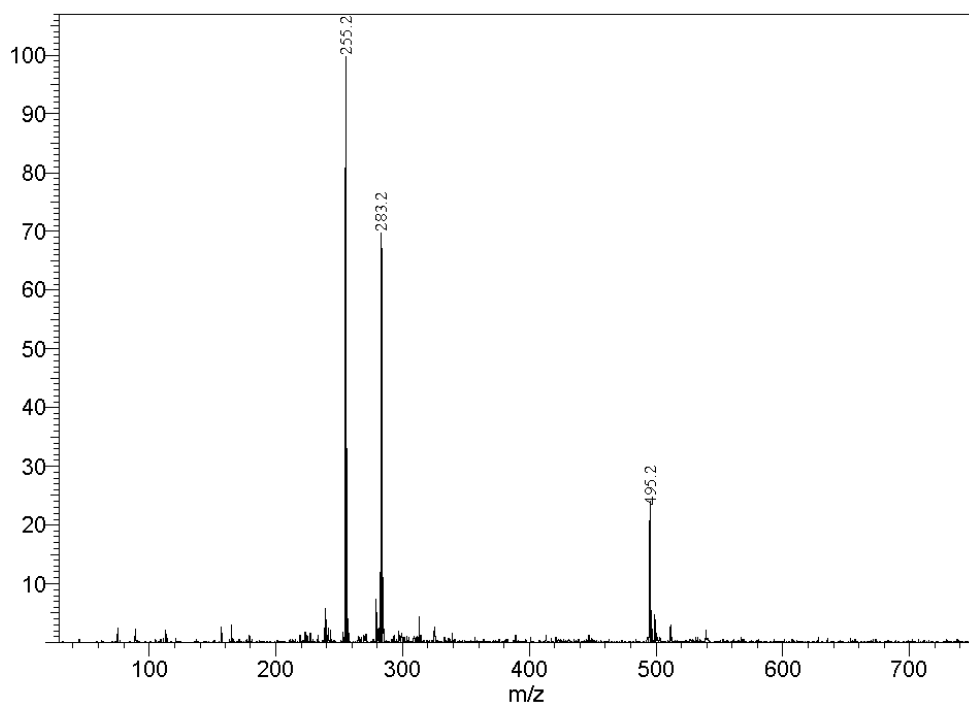

Figure S91. ESI-MS spectrum of the target compound (4u)

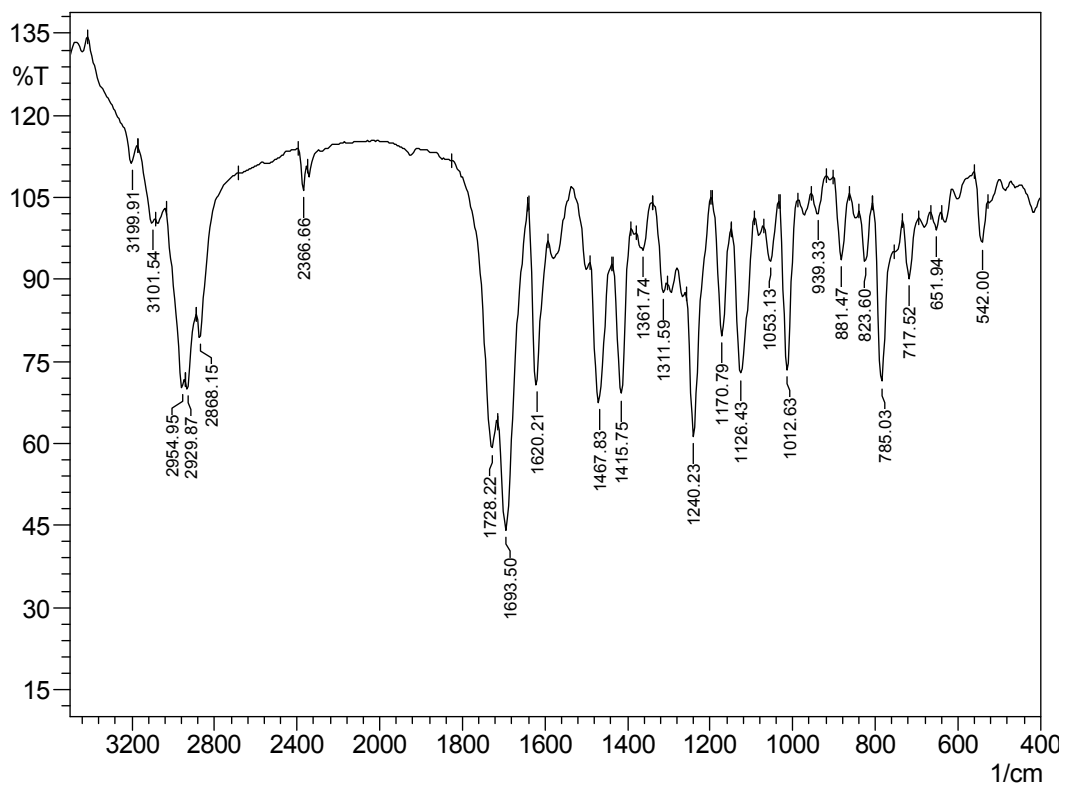

Figure S92. FTIR spectrum of the target compound (4v)

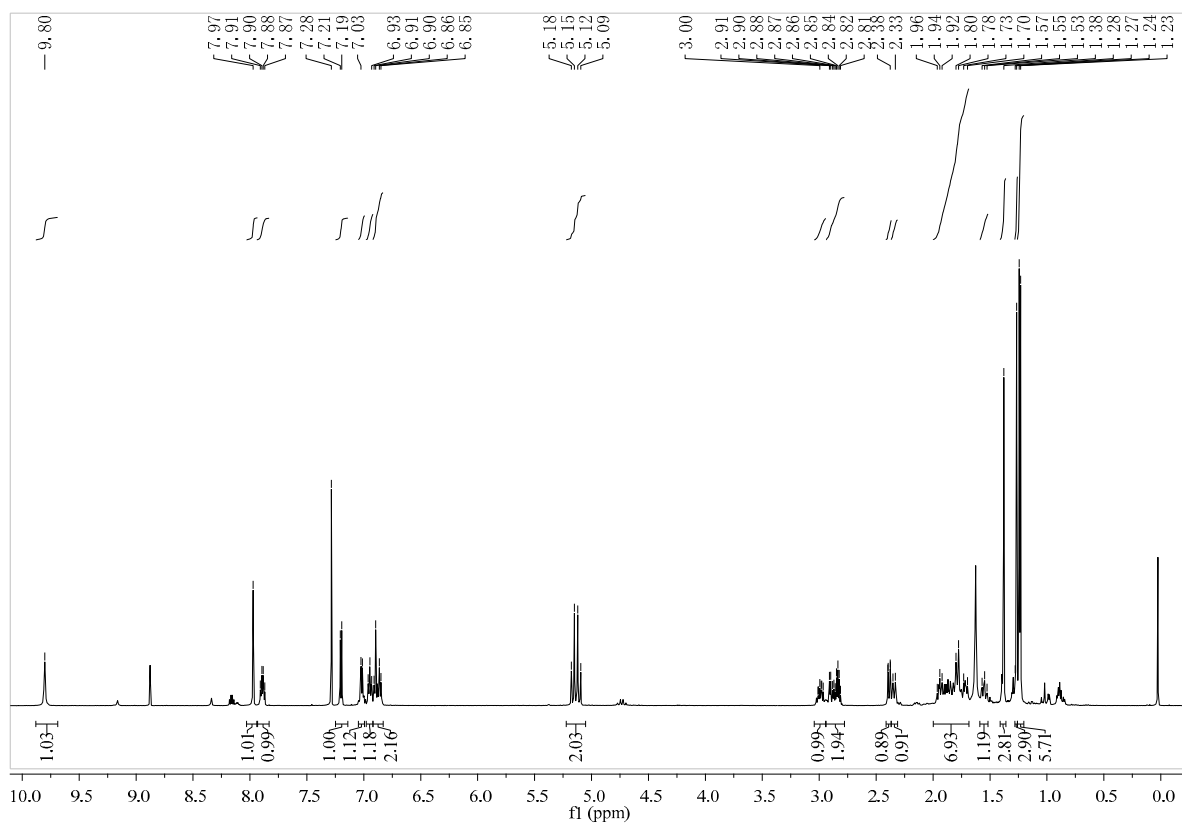

Figure S93.  $^1\text{H-NMR}$  spectrum of the target compound (**4v**) in  $\text{CDCl}_3$

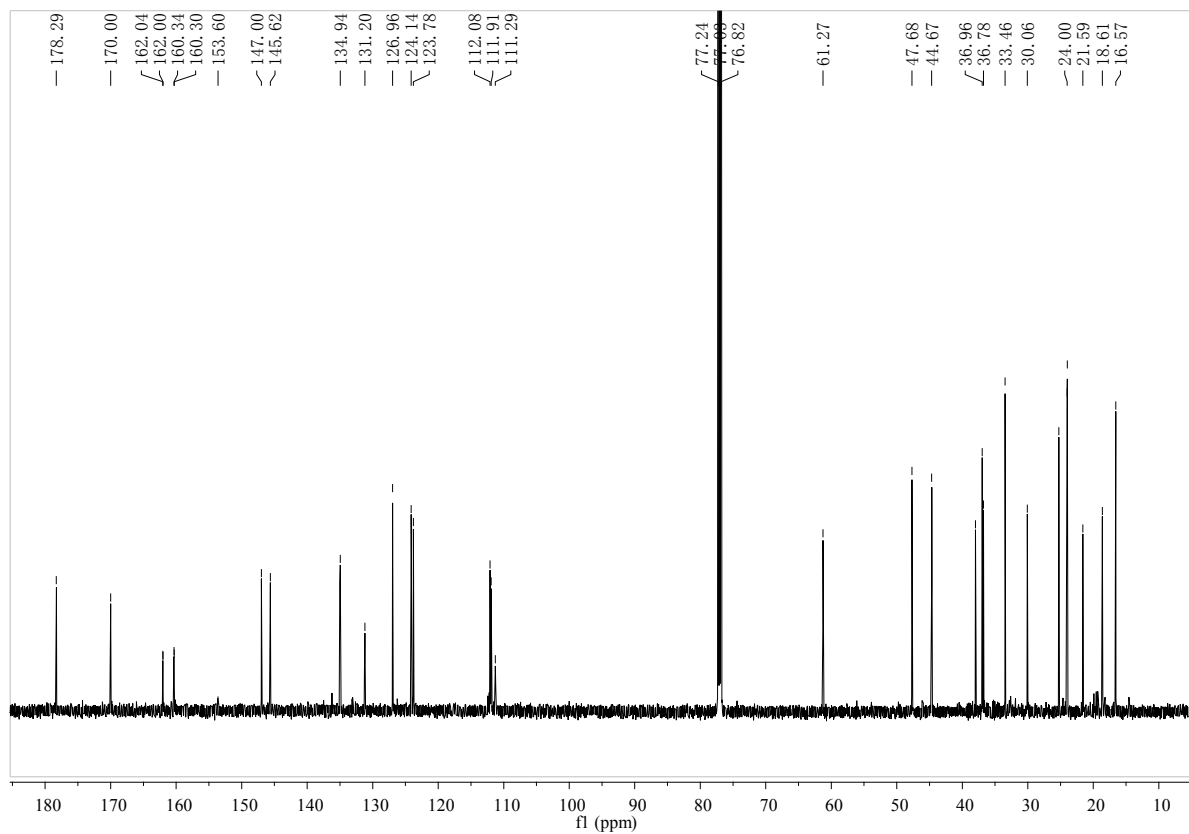

Figure S94.  $^{13}\text{C-NMR}$  spectrum of the target compound (**4v**) in  $\text{CDCl}_3$

# <Spectrum>

Line#:1 R.Time:0.417(Scan#:26)  
MassPeaks:13  
RawMode:Single 0.417(26) BasePeak:495.1(417737)  
BG Mode:None Segment 1 - Event 1

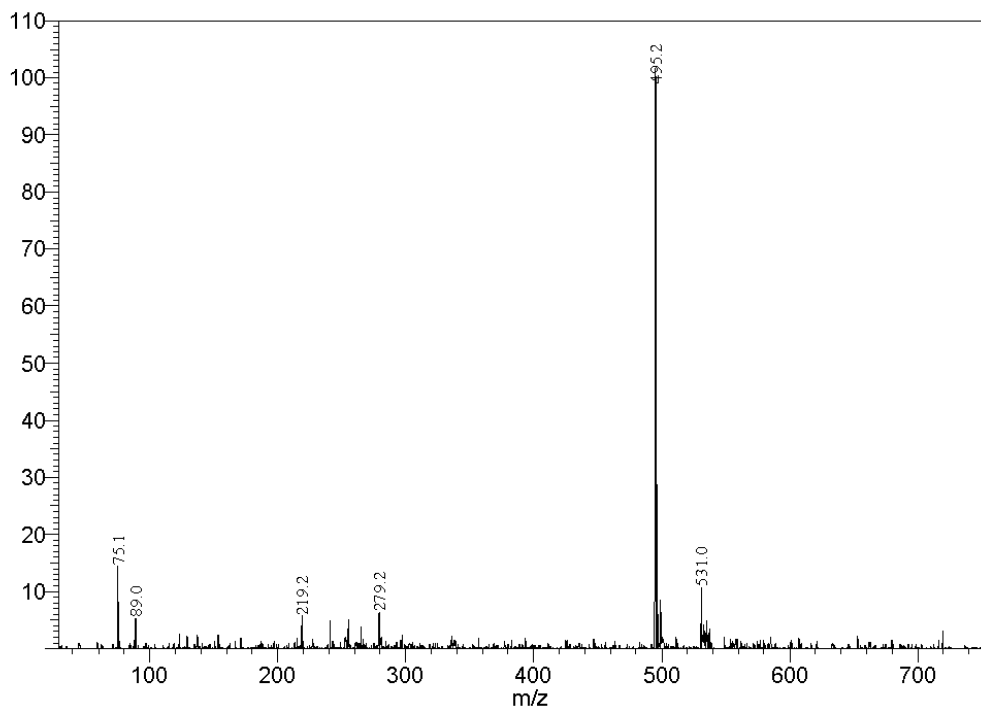

Figure S95. ESI-MS spectrum of the target compound (4v)

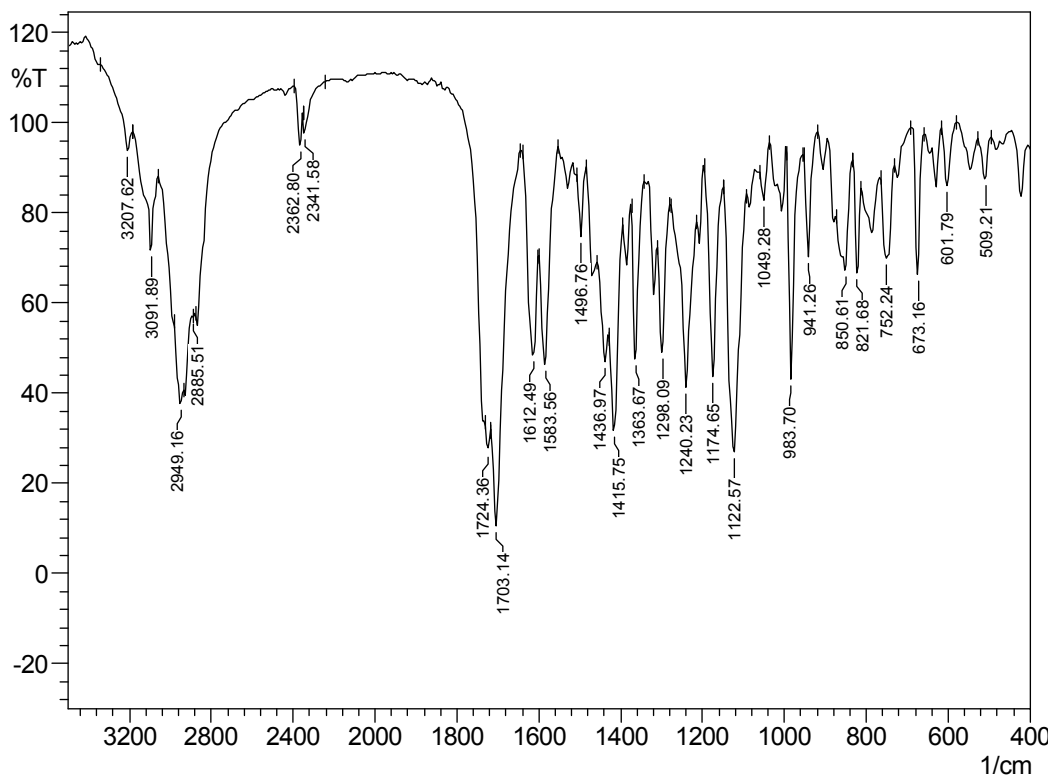

Figure S96. FTIR spectrum of the target compound (4w)



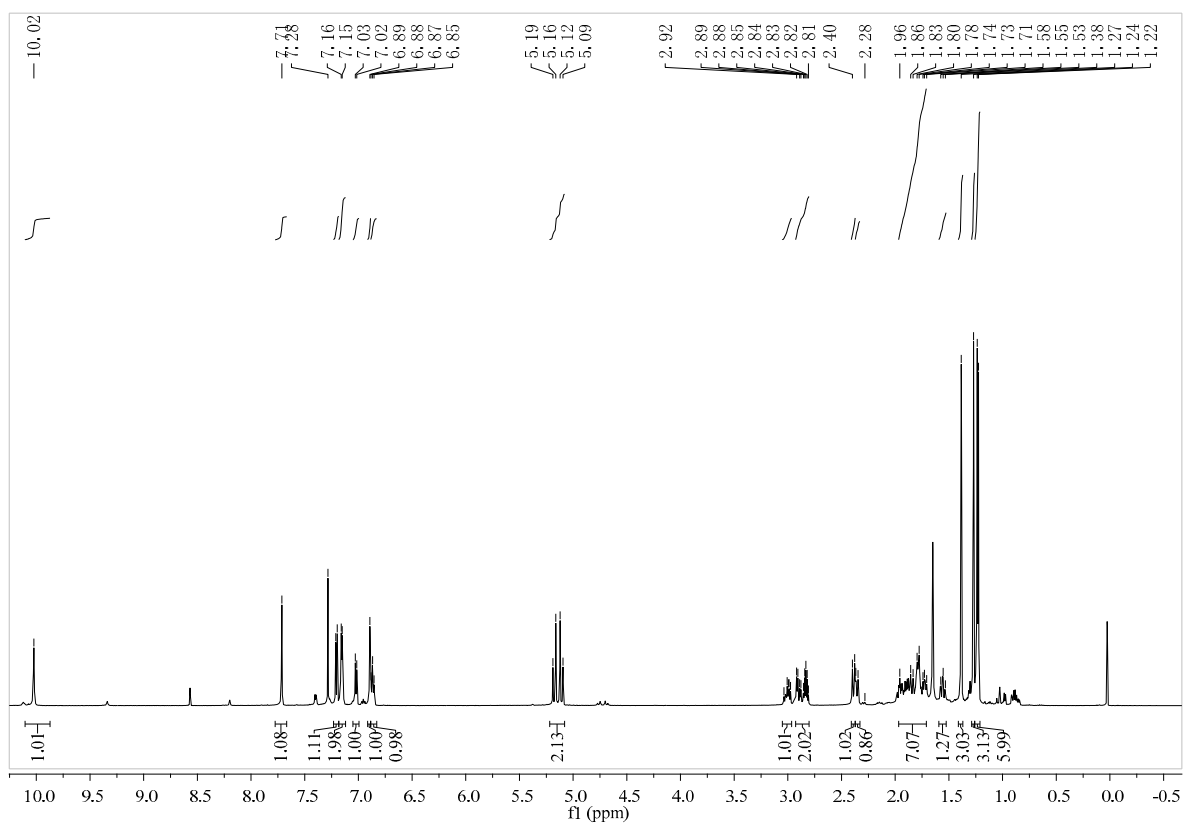

Figure S97.  $^1\text{H-NMR}$  spectrum of the target compound (**4w**) in  $\text{CDCl}_3$

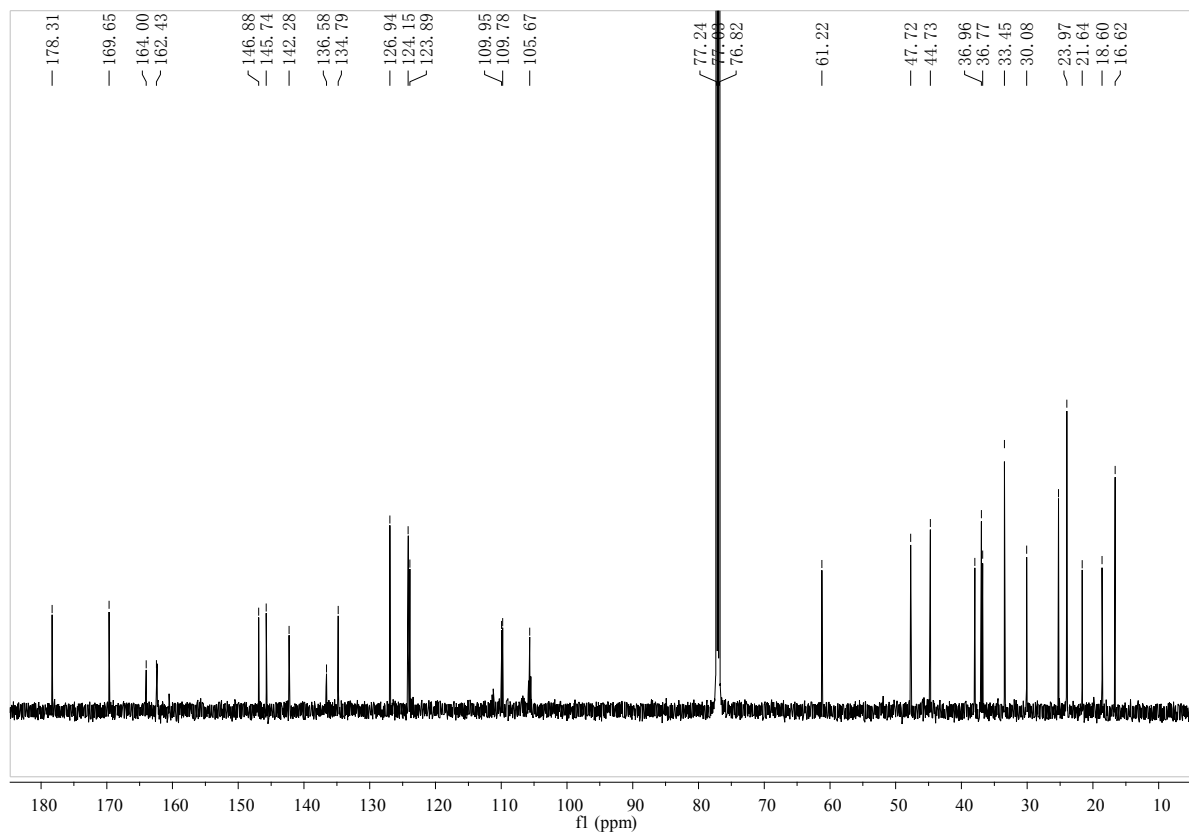

Figure S98.  $^{13}\text{C-NMR}$  spectrum of the target compound (**4w**) in  $\text{CDCl}_3$

# <Spectrum>

Line#:1 R.Time:0.450(Scan#:28)  
MassPeaks:13  
RawMode:Single 0.450(28) BasePeak:495.1(354149)  
BG Mode:None Segment 1 - Event 1

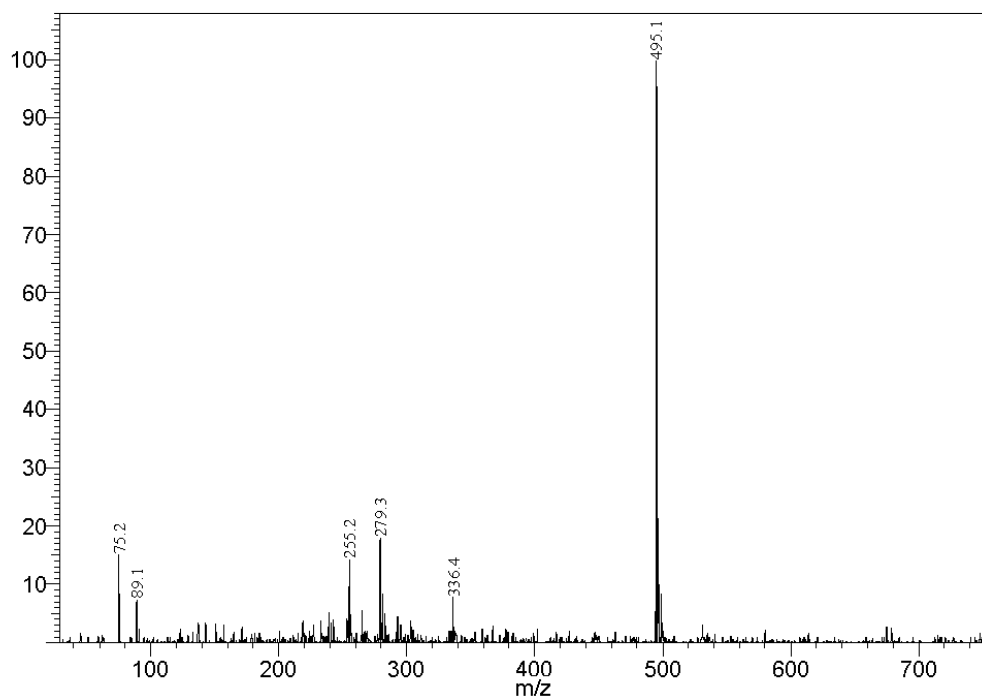

Figure S99. ESI-MS spectrum of the target compound (4w)

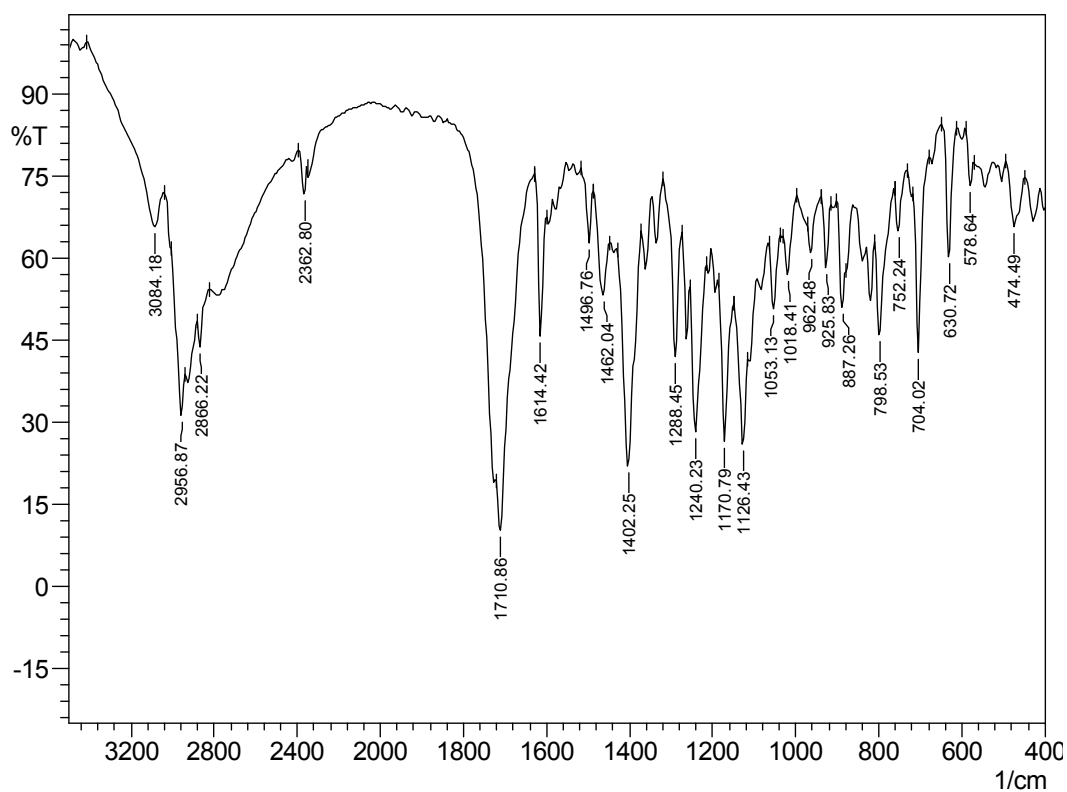

Figure S100. FTIR spectrum of the target compound (4x)

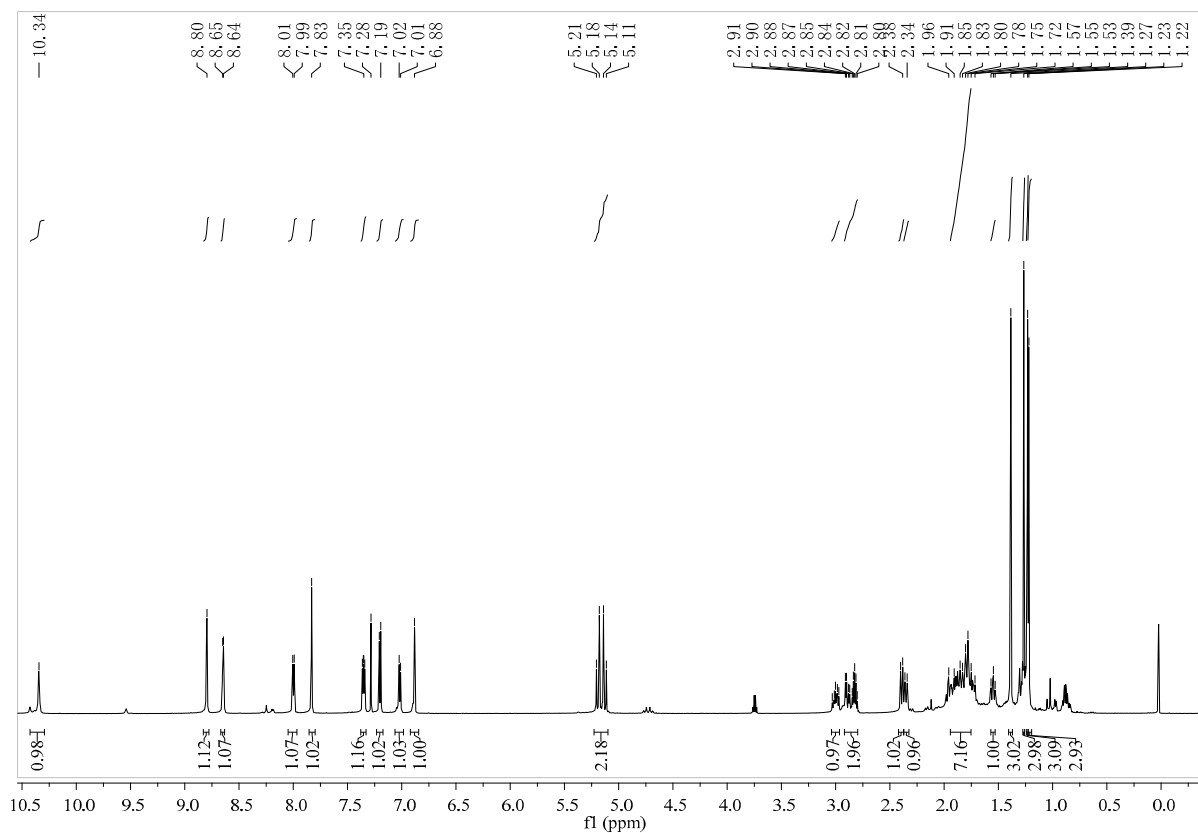

Figure S101.  $^1\text{H}$ -NMR spectrum of the target compound (**4x**) in  $\text{CDCl}_3$

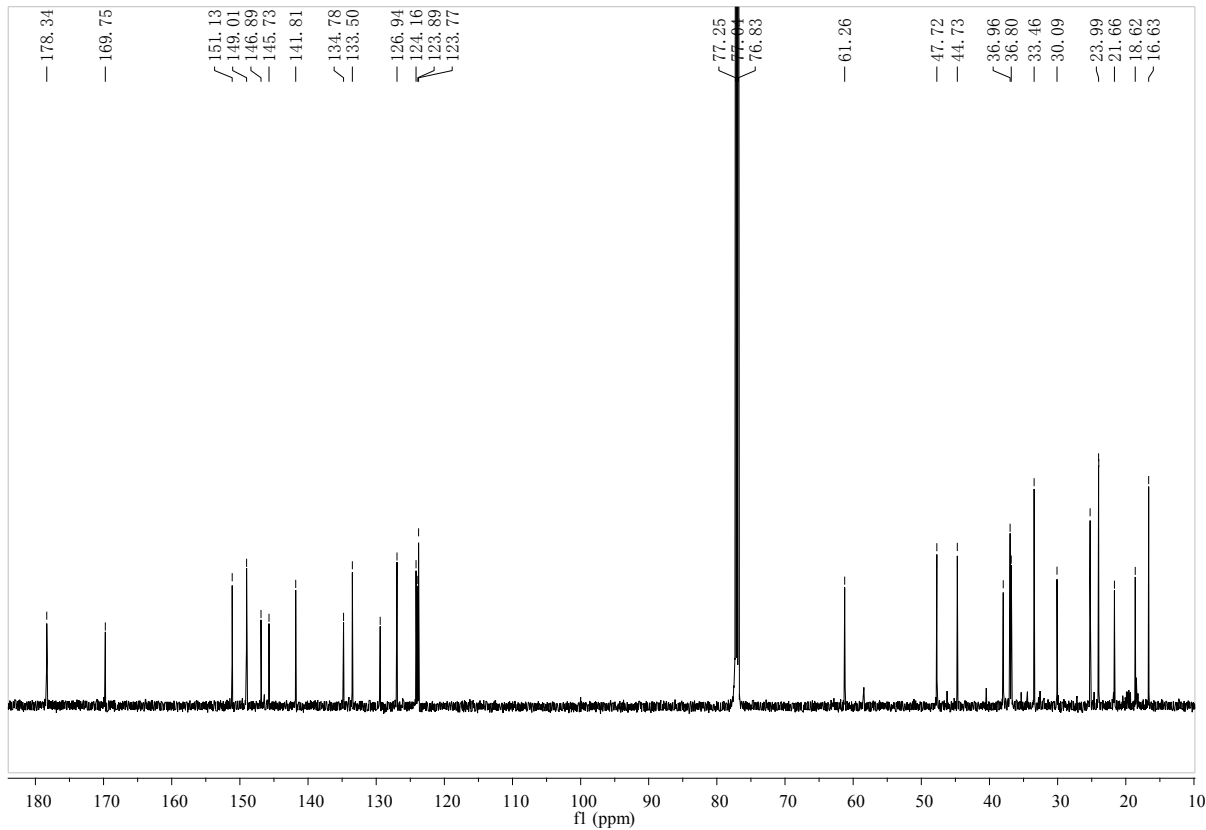

Figure S102.  $^{13}\text{C}$ -NMR spectrum of the target compound (**4x**) in  $\text{CDCl}_3$

# <Spectrum>

Line#:1 R.Time:0.417(Scan#:26)  
MassPeaks:15  
RawMode:Single 0.417(26) BasePeak:460.2(332240)  
BG Mode:None Segment 1 - Event 1

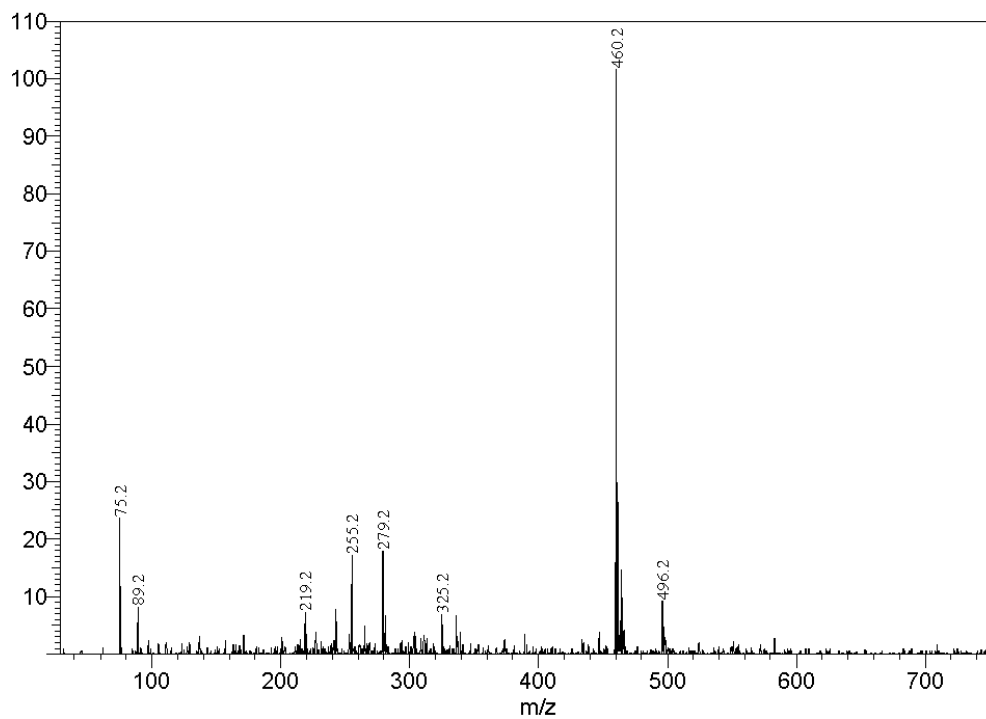

Figure S103. ESI-MS spectrum of the target compound (4x)
